# Supplementary material for: Preliminary Interpretations of Epigenetic Profiling of Cord Blood in Preeclampsia
Source: MDPI journal article supplement (doi:10.3390/genes13050888), 2022-05-16

## Supplementary Figure

### Supplementary Figure S1

- (A) The heatmap of distribution of transcription factor binding loci relative to TSS
- (B) The Distribution of transcription factor binding loci relative to TSS
- (C) Volcano plot of differential expressed genes

### Supplementary Figure S2

- (A) The Distribution of GATA family transcription factor binding sites

### Supplementary Figure S3

- (A-E) Peaks across the promoter regions of PGTIS , SERINC2, PCMTD2, TNFRSF6B and PRR25

Supplementary Figure S1

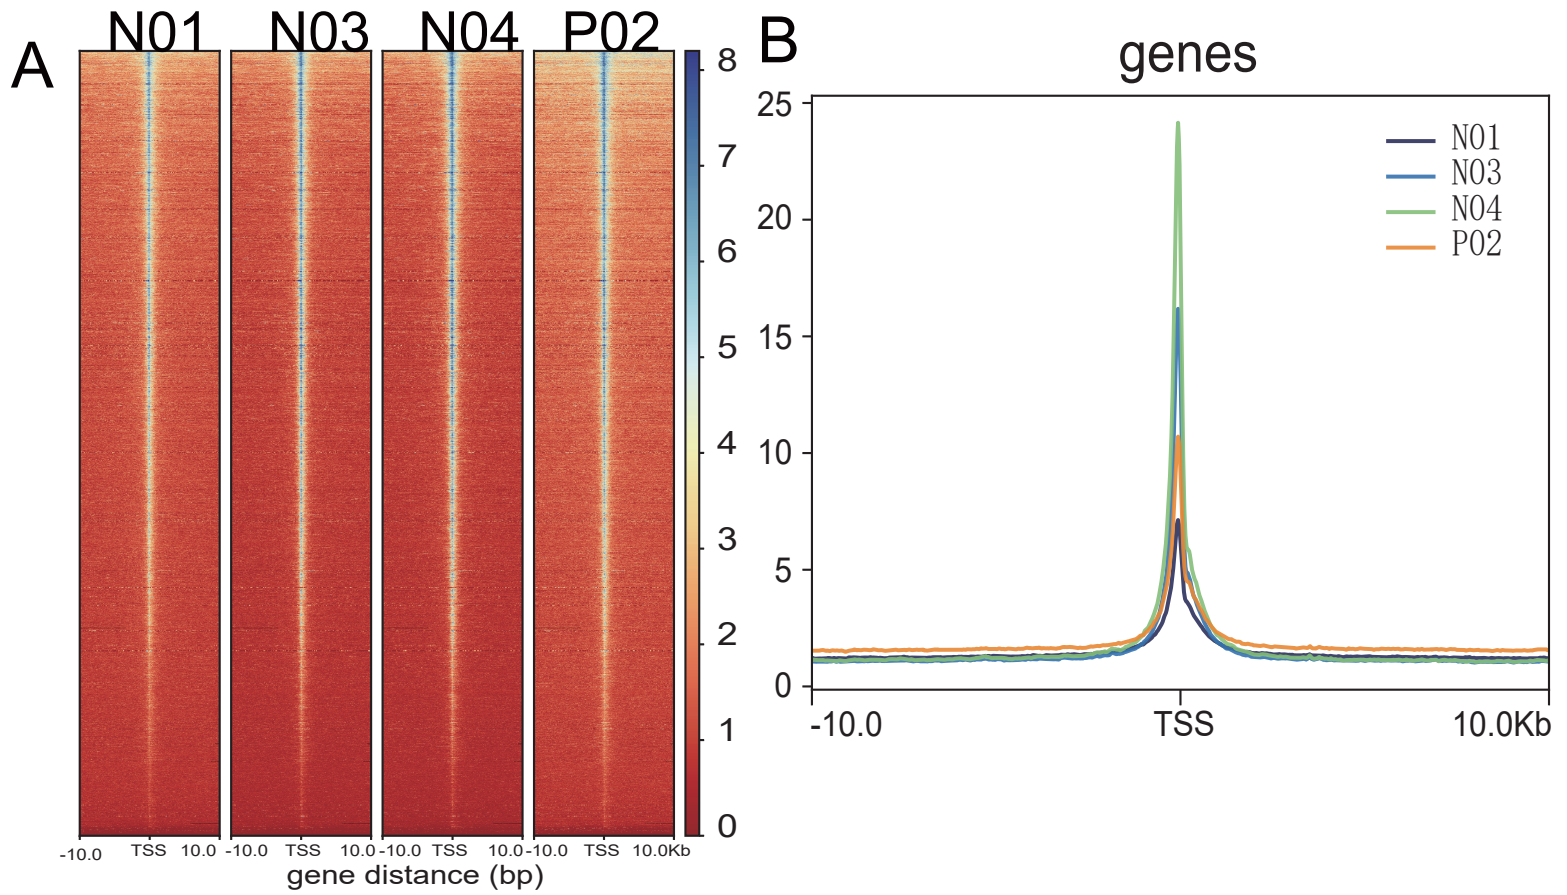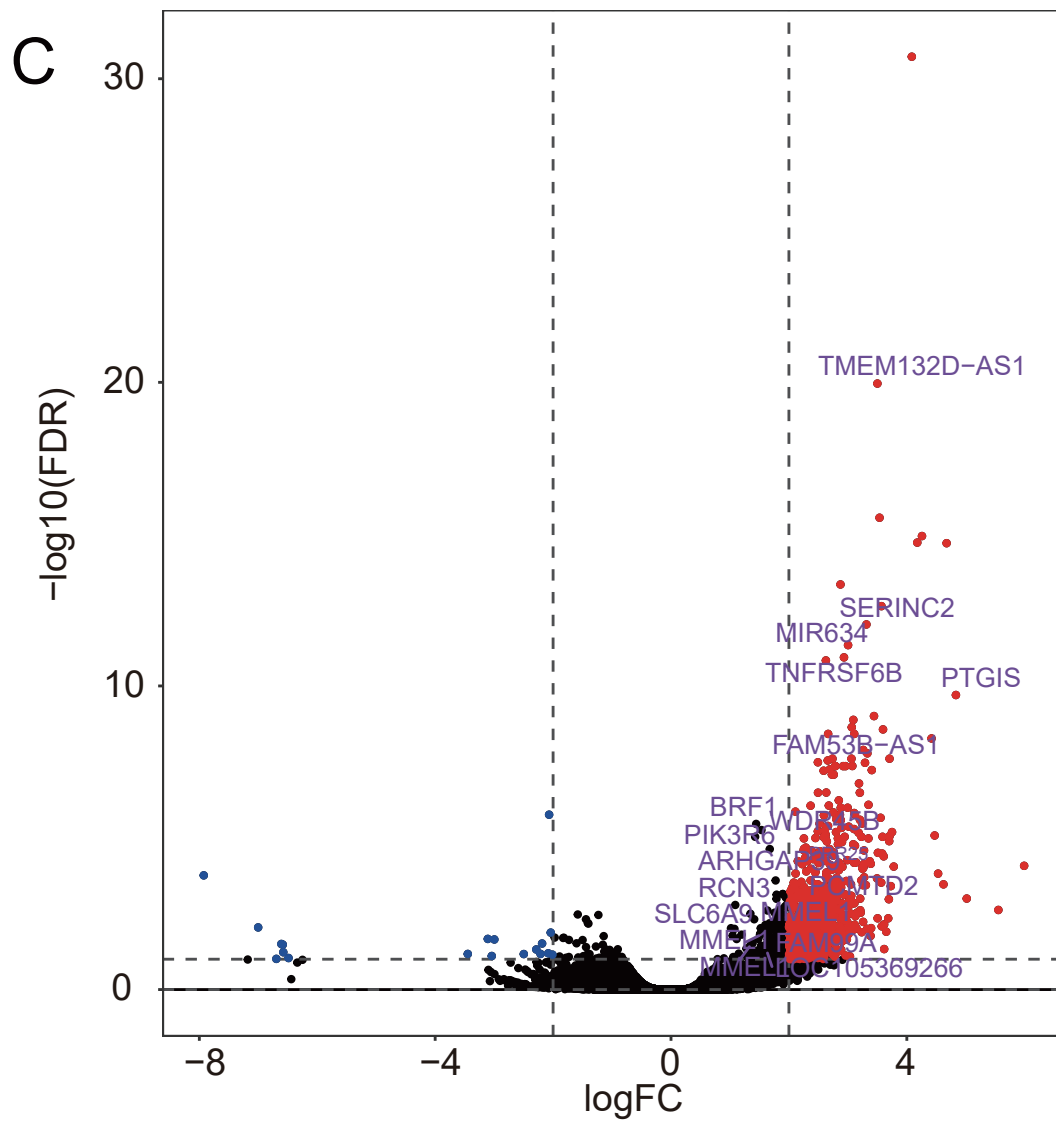



Supplimentary Figure S2

A

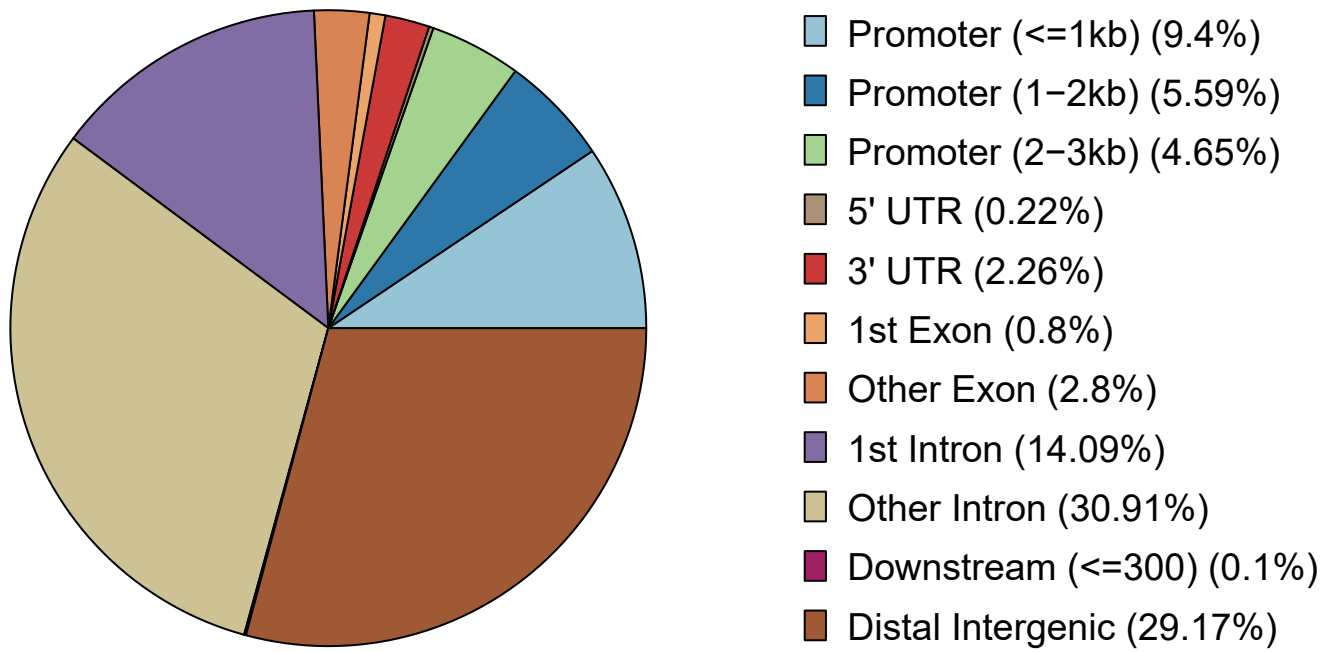

# Supplmentary Figrue S3

A

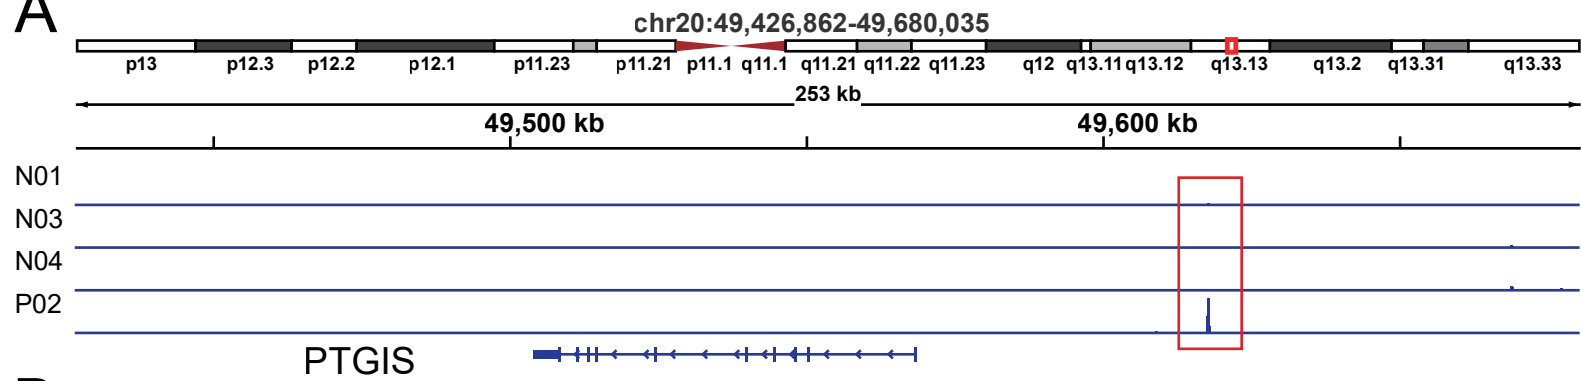

B

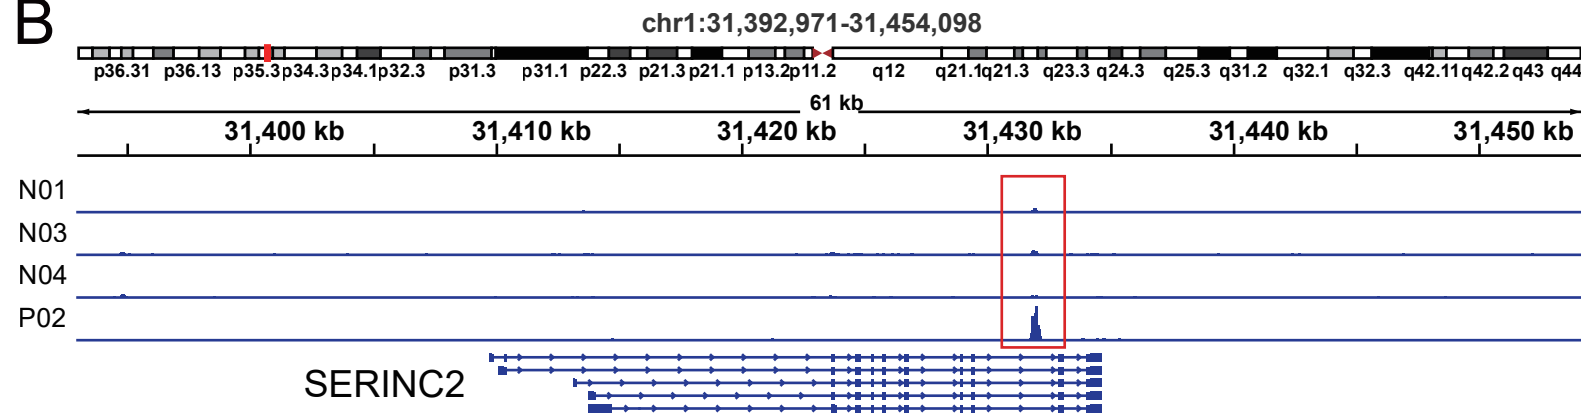

C

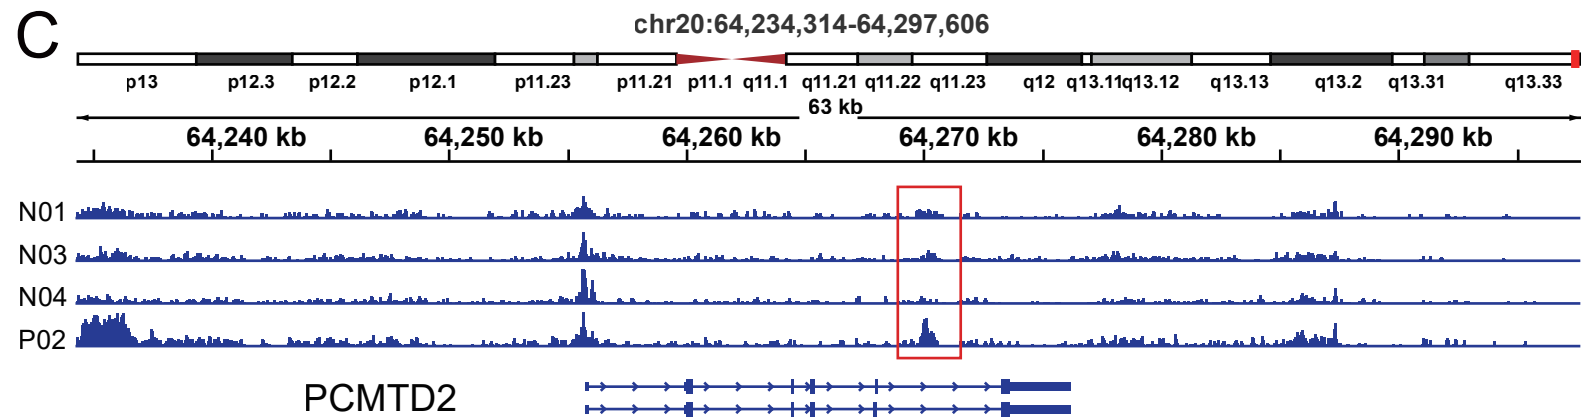

D

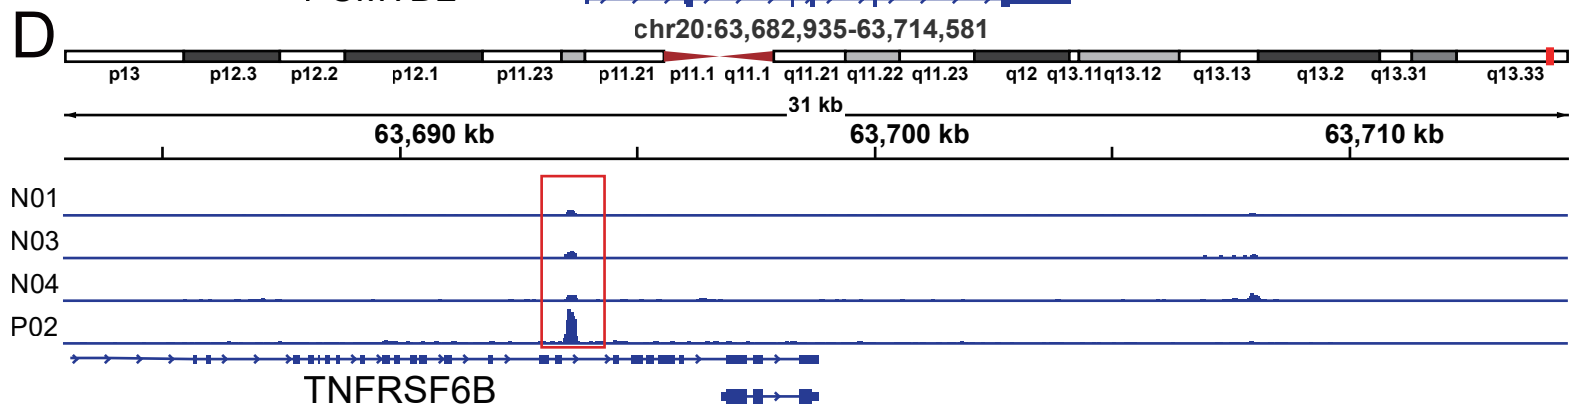

E

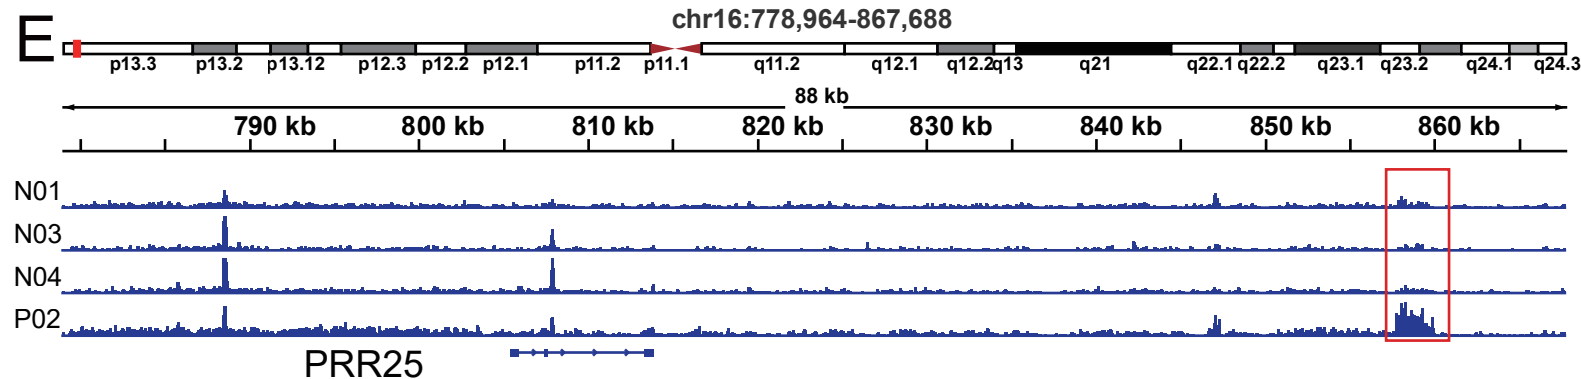

Supplement: s1 [file s1]
