# Supplementary material for: Preliminary Interpretations of Epigenetic Profiling of Cord Blood in Preeclampsia
Source: MDPI journal article supplement (doi:10.3390/genes13050888), 2022-05-16
Supplement: s1 [file s1]

Supplementary Table S1

| Supplementary Table S1 |             | The main test result of healthy gravidae (before labor) |             |  |
|------------------------|-------------|---------------------------------------------------------|-------------|--|
|                        | N01         | N03                                                     | N04         |  |
| Urine                  |             |                                                         |             |  |
| Protein                | -           | -                                                       | -           |  |
| 24h urine protein      | -           | -                                                       | -           |  |
| Blood                  |             |                                                         |             |  |
| BNP                    | NA          | NA                                                      | NA          |  |
| PT                     | 11.2s       | 11 s                                                    | 11.1 s      |  |
| FIB                    | 6.91 g/L ↑  | 5.44 g/L ↑                                              | 3.31 g/L    |  |
| PT-R                   | 97.4 %      | 100.3 %                                                 | 98.9 %      |  |
| D-Dimer                | 1.15 mg/L ↑ | 3.82 mg/L ↑                                             | 5.91 mg/L ↑ |  |

\*BNP stands for B-type Natriuretic Peptide. PT stands for prothrombin time. FIB stands for fibrinogen. PT-R stands for prothrombin time activity. D-D stands for D-Dimer. ↑ means higher than normal value. + means positive, - means negative.
