# Supplementary material for: Preliminary Interpretations of Epigenetic Profiling of Cord Blood in Preeclampsia
Source: Genes (Basel). 2022 May 16;13(5):888. doi: 10.3390/genes13050888 (PMC9141867; doi:10.3390/genes13050888)
Supplement: Supplementary file 1 [file genes-13-00888-s001.zip]

Archive with 4 entries (4 files):
- Supplementary Figures.pdf
- Supplementary Table S1 The main test result of healthy gravidae(before labor).pdf
- Supplementary Table S2 up-regulated pathway.xlsx
- Supplementary Table S3 DE peaks.xlsx
