# Supplementary material for: Preliminary Interpretations of Epigenetic Profiling of Cord Blood in Preeclampsia
Source: Genes (Basel). 2022 May 16;13(5):888. doi: 10.3390/genes13050888 (PMC9141867; doi:10.3390/genes13050888)
Supplement: Supplementary file 1 [file genes-13-00888-s001.zip › Supplementary Table S2 up-regulated pathway.xlsx]

## Sheet: new up pathway
Term	Database	ID	percent	Input number	Background number	P-Value	Corrected P-Value	Input
Acute myeloid leukemia	KEGG PATHWAY	hsa05221	0.00521512	4	66	0.0242024	0.0900942	MAP2K2|PPARD|PIK3R1|PIM1
Adrenergic signaling in cardiomyocytes	KEGG PATHWAY	hsa04261	0.011734	9	149	0.000907697	0.0160206	ADCY2|GNAS|PPP2R2D|TPM2|PPP2R2C|PRKACA|MAPK11|CACNG2|CACNG6
African trypanosomiasis	KEGG PATHWAY	hsa05143	0.00521512	4	37	0.00380465	0.0407415	HBA1|F2RL1|KNG1|PRKACA
AGE-RAGE signaling pathway in diabetic complications	KEGG PATHWAY	hsa04933	0.00651891	5	100	0.0248898	0.0900942	PLCG2|PRKACA|MAPK11|PIK3R1|PIM1
Aldosterone-regulated sodium reabsorption	KEGG PATHWAY	hsa04960	0.00521512	4	37	0.00380465	0.0407415	NEDD4L|PRKACA|PIK3R1|PDPK1
Amoebiasis	KEGG PATHWAY	hsa05146	0.00782269	6	95	0.00519262	0.0476608	RAB7A|GNAS|MUC2|PRKACA|PIK3R1|IL1R1
Autophagy - animal	KEGG PATHWAY	hsa04140	0.00782269	6	128	0.019198	0.079579	RAB7A|UVRAG|MAP2K2|PIK3R1|PDPK1|BNIP3
Breast cancer	KEGG PATHWAY	hsa05224	0.00912647	7	147	0.011	0.0614567	ESR1|FZD8|NOTCH1|NOTCH3|MAP2K2|PIK3R1|WNT7B
cAMP signaling pathway	KEGG PATHWAY	hsa04024	0.0130378	10	214	0.00298049	0.0382993	AMH|ADCY2|GNAS|GLP1R|MAP2K2|GRIN3B|PIK3R1|PDE4A|HTR1E|EDN2
Central carbon metabolism in cancer	KEGG PATHWAY	hsa05230	0.00521512	4	69	0.0277099	0.0962358	MAP2K2|PFKL|FGFR2|PIK3R1
Chagas disease (American trypanosomiasis)	KEGG PATHWAY	hsa05142	0.00912647	7	103	0.00176583	0.0274171	GNAS|PPP2R2D|KNG1|PPP2R2C|MAPK11|PIK3R1|CD3D
Choline metabolism in cancer	KEGG PATHWAY	hsa05231	0.00651891	5	99	0.0240027	0.0900942	MAP2K2|PRKACA|SLC22A1|PIK3R1|PDPK1
Cushing syndrome	KEGG PATHWAY	hsa04934	0.00912647	7	155	0.0142139	0.0679949	CACNA1H|ADCY2|GNAS|FZD8|ARNT|MAP2K2|WNT7B
Dilated cardiomyopathy (DCM)	KEGG PATHWAY	hsa05414	0.00782269	6	96	0.0054459	0.0482619	ADCY2|GNAS|ITGA2|TPM2|CACNG2|CACNG6
ECM-receptor interaction	KEGG PATHWAY	hsa04512	0.00651891	5	86	0.0142869	0.0679949	COL6A1|COMP|ITGA2|COL6A2|HSPG2
EGFR tyrosine kinase inhibitor resistance	KEGG PATHWAY	hsa01521	0.00651891	5	79	0.0103587	0.0605043	PRKACA|PLCG2|FGFR2|PIK3R1|MAP2K2
Endocrine resistance	KEGG PATHWAY	hsa01522	0.011734	9	98	4.89e-05	0.00209512	ADCY2|GNAS|ESR1|CARM1|NOTCH3|MAP2K2|MAPK11|PIK3R1|NOTCH1
Endocytosis	KEGG PATHWAY	hsa04144	0.0182529	14	244	6.49e-05	0.00236737	SNX3|RAB7A|EHD2|ZFYVE9|DNAJC6|NEDD4L|TFRC|ARFGAP3|ARFGEF2|IQSEC1|IQSEC3|CYTH2|FGFR2|CYTH3
Epstein-Barr virus infection	KEGG PATHWAY	hsa05169	0.0104302	8	201	0.0177282	0.0773073	IRF7|HLA-DRB1|MAP2K3|PLCG2|MAPK11|PIK3R1|CD3D|SIN3A
Fc epsilon RI signaling pathway	KEGG PATHWAY	hsa04664	0.00912647	7	68	0.000175921	0.00502353	MAP2K2|MAP2K3|PLCG2|PRKACA|MAPK11|PIK3R1|PDPK1
Focal adhesion	KEGG PATHWAY	hsa04510	0.011734	9	199	0.00577458	0.0487231	RASGRF1|COMP|ITGA2|PRKACA|PIK3R1|COL6A1|PDPK1|COL6A2|PARVG
Gap junction	KEGG PATHWAY	hsa04540	0.00651891	5	88	0.0155699	0.0714547	MAP2K2|TJP1|PRKACA|ADCY2|GNAS
Gastric cancer	KEGG PATHWAY	hsa05226	0.0104302	8	149	0.00344084	0.0401952	FZD8|MUC2|RXRA|MAP2K2|PIK3R1|TERT|FGFR2|WNT7B
Glutamatergic synapse	KEGG PATHWAY	hsa04724	0.0104302	8	114	0.00069584	0.0149026	ADCY2|GNAS|GRIK3|GRIN3B|DLGAP1|PRKACA|GRM4|SHANK3
GnRH signaling pathway	KEGG PATHWAY	hsa04912	0.00782269	6	93	0.00471209	0.0448521	ADCY2|GNAS|MAP2K3|MAP2K2|PRKACA|MAPK11
Hematopoietic cell lineage	KEGG PATHWAY	hsa04640	0.00651891	5	97	0.0222902	0.0881319	ITGA2|TFRC|CD3D|HLA-DRB1|IL1R1
Hepatitis B	KEGG PATHWAY	hsa05161	0.00912647	7	163	0.0180484	0.0773073	IRF7|HSPG2|MAP2K3|MAP2K2|PRKACA|MAPK11|PIK3R1
Hepatitis C	KEGG PATHWAY	hsa05160	0.00912647	7	155	0.0142139	0.0679949	IRF7|PPP2R2D|CLDN18|RXRA|PPP2R2C|MAP2K2|PIK3R1
Hepatocellular carcinoma	KEGG PATHWAY	hsa05225	0.0104302	8	168	0.0067837	0.051775	MAP2K2|FZD8|ARID1B|PLCG2|PRKACA|PIK3R1|TERT|WNT7B
HIF-1 signaling pathway	KEGG PATHWAY	hsa04066	0.00912647	7	109	0.00238884	0.0323122	TFRC|PLCG2|ARNT|MAP2K2|PFKL|PRKACA|PIK3R1
Human immunodeficiency virus 1 infection	KEGG PATHWAY	hsa05170	0.011734	9	212	0.00844577	0.0560021	CUL4A|SAMHD1|MAP2K2|MAP2K3|PLCG2|PRKACA|MAPK11|PIK3R1|CD3D
Human papillomavirus infection	KEGG PATHWAY	hsa05165	0.0195567	15	330	0.000407551	0.0104741	TERT|GNAS|FZD8|PPP2R2D|ITGA2|NOTCH1|PPP2R2C|NOTCH3|MAP2K2|PIK3R1|COMP|COL6A1|COL6A2|HES4|WNT7B
Human T-cell leukemia virus 1 infection	KEGG PATHWAY	hsa05166	0.011734	9	219	0.0102261	0.0605043	CDC16|BUB3|ADCY2|HLA-DRB1|MAP2K2|PIK3R1|TERT|CD3D|IL1R1
Inflammatory mediator regulation of TRP channels	KEGG PATHWAY	hsa04750	0.0156454	12	100	2.07e-07	5.33e-05	ADCY2|GNAS|KNG1|ASIC2|MAP2K3|PLCG2|PRKACA|MAPK11|PIK3R1|F2RL1|IL1R1|TRPV2
Influenza A	KEGG PATHWAY	hsa05164	0.011734	9	167	0.00192026	0.0274171	TPSB2|IRF7|ADAR|HLA-DRB1|MAP2K2|PRKACA|PIK3R1|TPSD1|TPSAB1
Inositol phosphate metabolism	KEGG PATHWAY	hsa00562	0.00651891	5	74	0.00805524	0.0560021	PLCH2|PLCG2|ITPKA|INPP5F|INPP5A
Insulin secretion	KEGG PATHWAY	hsa04911	0.00651891	5	86	0.0142869	0.0679949	TRPM4|GLP1R|PRKACA|ADCY2|GNAS
Leukocyte transendothelial migration	KEGG PATHWAY	hsa04670	0.00782269	6	112	0.0108309	0.0614567	PECAM1|CLDN18|PLCG2|PRKACA|MAPK11|PIK3R1
Long-term depression	KEGG PATHWAY	hsa04730	0.00521512	4	60	0.0180328	0.0773073	MAP2K2|PRKACA|GNA12|GNAS
MAPK signaling pathway	KEGG PATHWAY	hsa04010	0.0143416	11	295	0.00939543	0.0588933	CACNA1H|RASGRF1|MAP2K3|MAP2K2|PRKACA|CACNG6|GNA12|CACNG2|FGFR2|IL1R1|MAPK11
Melanogenesis	KEGG PATHWAY	hsa04916	0.00782269	6	101	0.00684961	0.051775	ADCY2|GNAS|FZD8|MAP2K2|PRKACA|WNT7B
Metabolic pathways	KEGG PATHWAY	hsa01100	0.0469361	36	1433	0.00587711	0.0487231	B4GALNT4|PTDSS2|PDXK|AGK|INPP5F|AGXT|NMRK2|RPEL1|PLCG2|ALG10B|SGMS1|INPP5A|CYP2S1|ITPKA|OGDH|PLCH2|PFKL|NDUFA10|GMPR|MRI1|HSD17B6|ST3GAL1|MAT2B|TPO|ACSF3|PTGIS|MVK|MCCC2|MAN1A2|GALNT17|ADCY2|ACYP2|ACSL6|PDE6B|AGPAT3|PDE4A
MicroRNAs in cancer	KEGG PATHWAY	hsa05206	0.0130378	10	299	0.0247442	0.0900942	MIR192|TIMP3|PIM1|NOTCH1|NOTCH3|MAP2K2|PLCG2|ST14|PRKACA|MIR324
mTOR signaling pathway	KEGG PATHWAY	hsa04150	0.0104302	8	153	0.00400599	0.0411815	FLCN|FZD8|MAP2K2|PRKACA|PIK3R1|PDPK1|NPRL3|WNT7B
Neuroactive ligand-receptor interaction	KEGG PATHWAY	hsa04080	0.0143416	11	338	0.0226796	0.0883131	KNG1|GRIK3|CHRNA4|GRM4|GALR1|GRIN3B|GLP1R|F2RL3|HTR1E|F2RL1|EDN2
Non-small cell lung cancer	KEGG PATHWAY	hsa05223	0.00782269	6	66	0.000935056	0.0160206	MAP2K2|RXRA|PLCG2|PRKACA|PIK3R1|PDPK1
Oxytocin signaling pathway	KEGG PATHWAY	hsa04921	0.00912647	7	153	0.0133545	0.0679949	ADCY2|GNAS|MAP2K2|PRKACA|CACNG6|CACNG2|TRPM2
Parathyroid hormone synthesis, secretion and action	KEGG PATHWAY	hsa04928	0.00782269	6	106	0.00849837	0.0560021	ADCY2|GNAS|RXRA|GNA12|PDE4A|PRKACA
Pathways in cancer	KEGG PATHWAY	hsa05200	0.0286832	22	530	7.37e-05	0.00236737	ITGA2|PLCG2|FZD8|ARNT|PIK3R1|GNA12|TERT|GNAS|PIM1|KIF7|RXRA|PPARD|FGFR2|ADCY2|ESR1|KNG1|NOTCH1|NOTCH3|MAP2K2|PRKACA|F2RL3|WNT7B
PD-L1 expression and PD-1 checkpoint pathway in cancer	KEGG PATHWAY	hsa05235	0.00651891	5	89	0.0162393	0.0732194	MAP2K3|MAP2K2|CD3D|MAPK11|PIK3R1
Peroxisome	KEGG PATHWAY	hsa04146	0.00651891	5	83	0.0124985	0.0679949	ACSL6|AGXT|MVK|PEX5|SLC27A2
Phagosome	KEGG PATHWAY	hsa04145	0.00912647	7	152	0.012939	0.0679949	RAB7A|COMP|ITGA2|HLA-DRB1|CORO1A|TFRC|DYNC1H1
Phosphatidylinositol signaling system	KEGG PATHWAY	hsa04070	0.00782269	6	99	0.00625996	0.0502753	INPP5A|INPP5F|ITPKA|PLCG2|PRKACA|PIK3R1
Phospholipase D signaling pathway	KEGG PATHWAY	hsa04072	0.0143416	11	148	4.53e-05	0.00209512	ADCY2|MAP2K2|GNAS|PLCG2|AGPAT3|PIK3R1|GRM4|PRKACA|CYTH3|CYTH2|GNA12
PI3K-Akt signaling pathway	KEGG PATHWAY	hsa04151	0.0156454	12	354	0.0134955	0.0679949	COMP|ITGA2|RXRA|PPP2R2C|MAP2K2|PRKACA|PIK3R1|PPP2R2D|COL6A1|PDPK1|COL6A2|FGFR2
Platelet activation	KEGG PATHWAY	hsa04611	0.00912647	7	124	0.00468557	0.0448521	ADCY2|GNAS|ITGA2|PLCG2|MAPK11|PIK3R1|F2RL3
PPAR signaling pathway	KEGG PATHWAY	hsa03320	0.00782269	6	76	0.00183821	0.0274171	ACSL6|RXRA|PPARD|SORBS1|PDPK1|SLC27A2
Progesterone-mediated oocyte maturation	KEGG PATHWAY	hsa04914	0.00651891	5	99	0.0240027	0.0900942	MOS|CDC16|MAPK11|ADCY2|PIK3R1
Prolactin signaling pathway	KEGG PATHWAY	hsa04917	0.00521512	4	70	0.0289428	0.0978725	MAP2K2|MAPK11|PIK3R1|ESR1
Proteoglycans in cancer	KEGG PATHWAY	hsa05205	0.0169492	13	203	4.1e-05	0.00209512	HSPG2|TIMP3|MAP2K2|FZD8|ITGA2|ESR1|PLCG2|ANK1|PRKACA|MAPK11|PIK3R1|PDPK1|WNT7B
Rap1 signaling pathway	KEGG PATHWAY	hsa04015	0.0143416	11	210	0.000789296	0.0156038	EVL|RAP1GAP|ADCY2|GNAS|MAP2K3|MAP2K2|PRKACA|MAPK11|PIK3R1|F2RL3|FGFR2
Regulation of actin cytoskeleton	KEGG PATHWAY	hsa04810	0.011734	9	214	0.00892835	0.0573646	MYH14|MOS|ITGA2|KNG1|MAP2K2|GNA12|PIK3R1|BAIAP2|FGFR2
Relaxin signaling pathway	KEGG PATHWAY	hsa04926	0.00782269	6	130	0.0204853	0.0835672	ADCY2|GNAS|MAP2K2|PRKACA|MAPK11|PIK3R1
Renal cell carcinoma	KEGG PATHWAY	hsa05211	0.00521512	4	69	0.0277099	0.0962358	MAP2K2|PIK3R1|FLCN|ARNT
Signaling pathways regulating pluripotency of stem cells	KEGG PATHWAY	hsa04550	0.011734	9	140	0.000597044	0.0139491	PCGF3|FZD8|JARID2|MAP2K2|KLF4|MAPK11|PIK3R1|FGFR2|WNT7B
Sphingolipid signaling pathway	KEGG PATHWAY	hsa04071	0.0130378	10	119	3.81e-05	0.00209512	PIK3R1|PPP2R2D|KNG1|PPP2R2C|MAP2K2|PRKACA|MAPK11|SGMS1|PDPK1|GNA12
T cell receptor signaling pathway	KEGG PATHWAY	hsa04660	0.00651891	5	103	0.0276765	0.0962358	MAP2K2|CD3D|MAPK11|PIK3R1|PDPK1
Th1 and Th2 cell differentiation	KEGG PATHWAY	hsa04658	0.00651891	5	92	0.0183616	0.0773595	HLA-DRB1|CD3D|NOTCH1|MAPK11|NOTCH3
Thyroid hormone signaling pathway	KEGG PATHWAY	hsa04919	0.0130378	10	119	3.81e-05	0.00209512	MAP2K2|ESR1|RXRA|NOTCH3|PLCG2|PRKACA|PIK3R1|PDPK1|NOTCH1|SIN3A
Tight junction	KEGG PATHWAY	hsa04530	0.0104302	8	170	0.00724267	0.0531819	TJP1|MYH14|PPP2R2D|CLDN18|PPP2R2C|ACTR3B|NEDD4L|MARVELD3
Toll-like receptor signaling pathway	KEGG PATHWAY	hsa04620	0.00651891	5	104	0.0286475	0.0978725	MAP2K3|MAP2K2|IRF7|MAPK11|PIK3R1
Vascular smooth muscle contraction	KEGG PATHWAY	hsa04270	0.00782269	6	132	0.0218299	0.0876608	ADCY2|GNAS|MAP2K2|PRKACA|GNA12|EDN2
VEGF signaling pathway	KEGG PATHWAY	hsa04370	0.00651891	5	59	0.00329644	0.0401952	PLCG2|PRKACA|MAPK11|PIK3R1|MAP2K2
Vibrio cholerae infection	KEGG PATHWAY	hsa05110	0.00521512	4	50	0.0101348	0.0605043	PLCG2|TJP1|PRKACA|GNAS
Vitamin digestion and absorption	KEGG PATHWAY	hsa04977	0.00391134	3	24	0.00844048	0.0560021	CBLC|SLC23A2|SLC19A1
Yersinia infection	KEGG PATHWAY	hsa05135	0.00782269	6	121	0.0151286	0.0706917	ACTR3B|MAP2K3|MAP2K2|MAPK11|PIK3R1|BAIAP2
