# Supplementary material for: Preliminary Interpretations of Epigenetic Profiling of Cord Blood in Preeclampsia
Source: Genes (Basel). 2022 May 16;13(5):888. doi: 10.3390/genes13050888 (PMC9141867; doi:10.3390/genes13050888)
Supplement: Supplementary file 1 [file genes-13-00888-s001.zip › Supplementary Table S3 DE peaks.xlsx]

## Sheet: outdeg
PeakID	logFC	logCPM	LR	PValue	FDR	GeneName		red： logFC>2, logCPM>0, FDR<0.1
peak_13116	4.08446	-0.105976	156.864	5.48154e-36	1.8805e-31	LOC100128882		blue: logFC < -2, logCPM>0,FDR<0.1
peak_8636	3.50122	0.320961	106.286	6.3835e-25	1.09496e-20	TMEM132D-AS1
peak_22827	3.53736	-0.786013	85.3381	2.51473e-20	2.87567e-16	EFCAB6-AS1
peak_5177	4.25725	-1.20112	82.016	1.3499e-19	1.15774e-15	PKP3
peak_5221	4.17741	-1.04095	80.5989	2.7652e-19	1.89726e-15	MUC2
peak_29742	4.67485	-0.828072	80.148	3.47398e-19	1.98631e-15	LOC100507642
peak_26198	2.87484	-0.4244	73.6605	9.27747e-18	4.54676e-14	TERT
peak_15859	3.56976	-1.03903	70.1533	5.48695e-17	2.35294e-13	C2CD4C
peak_823	3.31496	0.731217	67.1852	2.47165e-16	9.42137e-13	SERINC2
peak_14777	3.00344	0.514541	63.8874	1.31737e-15	4.51936e-12	MIR634
peak_21881	2.93423	-0.506011	61.8675	3.67359e-15	1.14569e-11	RIPK4
peak_21579	2.62728	0.915285	61.2372	5.05966e-15	1.44647e-11	TNFRSF6B
peak_21318	4.83279	1.54428	55.9222	7.5396e-14	1.98964e-10	PTGIS
peak_22828	3.44337	-0.492179	52.6376	4.0113e-13	9.82941e-10	EFCAB6-AS1
peak_49	3.09287	-0.731824	51.9382	5.72751e-13	1.30992e-09	ATAD3B
peak_3526	3.06627	-1.01173	50.7116	1.06986e-12	2.29392e-09	ZMYND11
peak_15279	3.59636	-1.58719	50.2713	1.33891e-12	2.70192e-09	METRNL
peak_15179	3.10797	-0.856166	49.4376	2.04784e-12	3.80215e-09	MIR3186
peak_13456	2.66518	-0.93976	49.3829	2.10578e-12	3.80215e-09	WSCD1
peak_5178	4.41906	-1.47998	48.6088	3.12466e-12	5.35973e-09	PKP3
peak_3613	3.26112	-1.43223	46.7995	7.86341e-12	1.28458e-08	LINC02657
peak_5220	3.33067	-1.06945	46.2046	1.06524e-11	1.66109e-08	MUC2
peak_6403	2.7389	-0.483957	45.3225	1.67117e-11	2.48569e-08	CCDC90B
peak_13187	3.70685	-1.63077	45.2343	1.74812e-11	2.48569e-08	DPEP1
peak_10196	3.06139	-0.828182	45.1647	1.81141e-11	2.48569e-08	NRXN3
peak_22915	2.65901	-0.788634	44.8183	2.16195e-11	2.8526e-08	GRAMD4
peak_4989	2.49184	0.10839	44.4765	2.57426e-11	3.27083e-08	FAM53B-AS1
peak_13063	3.29079	-1.66426	44.3336	2.76927e-11	3.39295e-08	LOC101928708
peak_11793	2.78334	-0.361251	43.7253	3.77861e-11	4.33318e-08	MIR3176
peak_21519	3.0759	-1.20699	43.7197	3.78929e-11	4.33318e-08	GATA5
peak_13184	2.92036	-1.15163	43.5528	4.12677e-11	4.37765e-08	CPNE7
peak_3566	2.78823	-0.939178	43.5204	4.19564e-11	4.37765e-08	ADARB2-AS1
peak_11726	2.95987	-1.41708	43.5132	4.211e-11	4.37765e-08	ADAMTS17
peak_21996	2.693	-0.822332	42.9823	5.5237e-11	5.57341e-08	UBE2G2
peak_22882	3.40559	-1.76415	42.81	6.03229e-11	5.91268e-08	WNT7B
peak_18256	2.58904	-0.904565	42.6635	6.50148e-11	6.19555e-08	HPCAL1
peak_10232	2.72871	-1.01419	42.0421	8.93286e-11	8.28246e-08	FOXN3
peak_13230	2.76048	-0.727285	41.9755	9.24228e-11	8.34383e-08	LOC100506388
peak_22939	3.18861	-0.714882	40.618	1.85098e-10	1.6282e-07	TAFA5
peak_3426	2.63419	-0.868845	39.2227	3.78118e-10	3.24293e-07	FMN2
peak_15269	2.49394	-0.622946	39.1346	3.95572e-10	3.27847e-07	B3GNTL1
peak_10917	3.20348	-1.88213	39.1062	4.01375e-10	3.27847e-07	MIR147B
peak_22820	2.84638	-1.59423	37.9214	7.36532e-10	5.87616e-07	LOC101927447
peak_22175	3.3504	-1.74536	37.2198	1.05534e-09	8.22831e-07	CCDC188
peak_9438	2.6772	-1.07457	37.0673	1.1412e-09	8.69997e-07	LOC101928841
peak_99	2.36785	-0.681058	37.0064	1.17743e-09	8.78108e-07	PLCH2
peak_11762	2.99595	-1.42168	36.6581	1.40776e-09	1.0242e-06	NPRL3
peak_26079	2.88039	-1.3254	36.6234	1.43303e-09	1.0242e-06	LINC01099
peak_22986	2.11085	-0.506592	36.0014	1.97173e-09	1.38045e-06	MAPK11
peak_16005	2.75541	-1.26892	35.846	2.13545e-09	1.46517e-06	AMH
peak_31220	3.10723	-1.33101	35.7167	2.28201e-09	1.53503e-06	AGK
peak_10916	3.11991	-1.5216	35.4677	2.59314e-09	1.71077e-06	MIR147B
peak_21940	2.86518	-0.881759	35.3967	2.6894e-09	1.73839e-06	LINC00322
peak_34178	-2.06715	0.331067	35.363	2.73635e-09	1.73839e-06	LOC283788
peak_8429	2.59391	-0.986951	35.2382	2.91748e-09	1.81977e-06	LINC02423
peak_31205	3.55499	-2.2055	34.8361	3.58661e-09	2.19718e-06	SLC37A3
peak_31441	2.80351	-1.2412	34.5996	4.04984e-09	2.43743e-06	LOC100506585
peak_30768	3.20458	-1.95979	34.4723	4.32369e-09	2.55739e-06	TMEM130
peak_10683	2.87938	-0.869462	34.3825	4.52787e-09	2.63276e-06	TJP1
peak_22938	3.24186	-1.90874	33.8493	5.95507e-09	3.40491e-06	TAFA5
peak_13006	2.52123	-1.23463	33.8071	6.0855e-09	3.42244e-06	ZDHHC7
peak_10559	1.4445	0.354934	33.7313	6.32757e-09	3.50119e-06	BRF1
peak_31454	2.66281	-1.39242	33.401	7.49835e-09	4.08315e-06	MIR595
peak_5182	2.63811	-1.50347	33.2795	7.9821e-09	4.27866e-06	SIGIRR
peak_15950	3.01484	-1.61156	33.2322	8.17851e-09	4.31649e-06	C19orf25
peak_9	2.89282	-1.63113	33.0268	9.08955e-09	4.72464e-06	PERM1
peak_4710	3.10528	-0.965789	32.8193	1.01134e-08	5.17838e-06	PAX2
peak_15247	1.5348	0.398571	32.6484	1.10431e-08	5.57124e-06	WDR45B
peak_31443	2.60961	-0.994426	32.5029	1.19018e-08	5.91741e-06	LOC100506585
peak_29743	2.49127	-0.557152	32.4035	1.2526e-08	6.13882e-06	FAM20C
peak_22777	2.79905	-0.218682	32.26	1.34863e-08	6.51074e-06	TCF20
peak_21558	3.74906	-2.01755	32.2345	1.36645e-08	6.51074e-06	KCNQ2
peak_14305	3.18231	-1.95355	32.114	1.45385e-08	6.83232e-06	SLC4A1
peak_30354	2.62359	-1.49556	31.8079	1.70202e-08	7.89047e-06	MIR4657
peak_10334	4.47217	-2.67451	31.6554	1.84106e-08	8.42127e-06	ITPK1-AS1
peak_15339	3.70752	-2.36553	31.5348	1.959e-08	8.84281e-06	DLGAP1
peak_18156	3.58785	-2.34339	31.3578	2.14596e-08	9.29257e-06	EIPR1
peak_22817	2.94623	-1.86143	31.3494	2.15522e-08	9.29257e-06	LOC105373051
peak_13590	1.42697	0.56097	31.3462	2.15882e-08	9.29257e-06	PIK3R6
peak_33979	2.59373	-1.21622	31.3206	2.18749e-08	9.29257e-06	RNU6ATAC
peak_25032	3.22946	-1.44398	31.3147	2.19407e-08	9.29257e-06	PPP2R2C
peak_22021	2.59727	-1.41405	31.1664	2.36834e-08	9.90831e-06	ADARB1
peak_7784	2.45027	-0.826395	31.0873	2.46683e-08	1.0196e-05	HSD17B6
peak_16018	3.34912	-1.96455	30.984	2.60158e-08	1.0531e-05	MIR7108
peak_21432	2.83143	-1.46891	30.956	2.63948e-08	1.0531e-05	LOC100291105
peak_11814	2.62351	1.28041	30.9362	2.66655e-08	1.0531e-05	PRR25
peak_26176	2.2548	-1.09704	30.9332	2.67066e-08	1.0531e-05	CEP72
peak_531	3.70109	-2.36378	30.5091	3.3231e-08	1.29548e-05	LOC101928163
peak_18142	2.64319	-1.40539	30.4516	3.42306e-08	1.31945e-05	TPO
peak_25033	2.90034	-1.31341	30.336	3.63325e-08	1.38491e-05	PPP2R2C
peak_8298	3.09158	-2.12354	29.9846	4.35482e-08	1.64172e-05	MVK
peak_15806	2.83198	-1.80534	29.9584	4.41411e-08	1.64598e-05	MBP
peak_6726	3.12021	-1.99914	29.7309	4.96372e-08	1.83102e-05	NECTIN1
peak_9470	2.28634	-0.390999	29.4382	5.77297e-08	2.10689e-05	CDC16
peak_7409	2.25581	-1.09874	29.233	6.41768e-08	2.31752e-05	YAF2
peak_32747	1.67548	0.556107	29.1804	6.59438e-08	2.35653e-05	ARHGAP39
peak_18424	2.69096	-1.59194	29.1556	6.67908e-08	2.36219e-05	ADGRF3
peak_11823	2.2522	-1.09185	28.9573	7.39912e-08	2.59014e-05	TPSB2
peak_34040	2.38301	-0.189356	28.9259	7.5201e-08	2.6059e-05	NOTCH1
peak_5152	3.27357	-1.9185	28.8995	7.62307e-08	2.61517e-05	ODF3
peak_22043	2.52514	-0.0168738	28.7679	8.15928e-08	2.77141e-05	LINC01694
peak_22144	2.61879	-1.28808	28.6255	8.78166e-08	2.95356e-05	SLC25A1
peak_5057	2.53717	-1.19678	28.5706	9.03422e-08	3.00901e-05	TCERG1L-AS1
peak_17819	2.76172	-1.42148	28.5221	9.26335e-08	3.05566e-05	C19orf81
peak_31707	3.51	-2.09039	28.4535	9.5974e-08	3.1357e-05	SLC25A37
peak_29724	3.5821	-1.70479	28.3268	1.02466e-07	3.31621e-05	LOC102724511
peak_22035	2.71979	-1.83015	28.2521	1.065e-07	3.41456e-05	MIR6815
peak_13261	2.47963	-1.44489	28.1633	1.115e-07	3.54178e-05	ABR
peak_4787	2.75192	-1.3749	27.9761	1.22825e-07	3.86571e-05	RPEL1
peak_21610	3.60766	-2.46105	27.8463	1.31343e-07	4.09622e-05	MYT1
peak_5185	2.54192	-1.1414	27.6491	1.45443e-07	4.49511e-05	PTDSS2
peak_16154	2.27445	-1.10197	27.584	1.50415e-07	4.60727e-05	LRG1
peak_15145	2.57247	-1.74818	27.5128	1.56057e-07	4.73778e-05	NPTX1
peak_26197	2.412	-0.429241	27.3622	1.68694e-07	5.0765e-05	TERT
peak_22056	2.99012	-1.84537	27.2018	1.83291e-07	5.4678e-05	COL6A1
peak_15178	2.63284	-1.85899	27.0403	1.99253e-07	5.88525e-05	MIR4740
peak_33262	2.31412	-1.43793	27.01	2.02408e-07	5.88525e-05	SECISBP2
peak_12398	2.1514	-0.614846	27.0098	2.02431e-07	5.88525e-05	CORO1A
peak_20602	3.37133	-2.22425	26.9691	2.06733e-07	5.9598e-05	LINC01238
peak_6944	2.22905	-0.803927	26.8851	2.15915e-07	6.17264e-05	LOC105369595
peak_10442	3.14055	-2.24139	26.7739	2.28708e-07	6.48433e-05	MIR379
peak_34039	2.85023	-1.83376	26.7125	2.36095e-07	6.63891e-05	MIR4673
peak_29871	3.10591	-2.19916	26.6922	2.38585e-07	6.65439e-05	GNA12
peak_6174	2.50261	-1.06825	26.6327	2.46049e-07	6.80723e-05	MIR3164
peak_30759	3.38823	-2.34365	26.4935	2.64421e-07	7.20129e-05	TECPR1
peak_34004	3.27551	-2.35033	26.493	2.64491e-07	7.20129e-05	C9orf62
peak_29899	2.22557	-0.141332	26.4208	2.74564e-07	7.41669e-05	MIR4656
peak_24268	2.70062	-1.97762	26.3044	2.91631e-07	7.81616e-05	RAB7A
peak_28517	5.99001	-3.14722	26.1522	3.15533e-07	8.39122e-05	PIM1
peak_33995	3.77808	-2.57017	26.0253	3.36973e-07	8.89245e-05	RXRA
peak_14676	2.90751	-2.07224	25.9644	3.47773e-07	9.1074e-05	2022-03-10
peak_16943	3.26709	-2.3485	25.897	3.60134e-07	9.30329e-05	ZNF728
peak_16134	2.76752	-1.87254	25.8941	3.60677e-07	9.30329e-05	MAP2K2
peak_20592	3.24877	-2.12952	25.8267	3.73485e-07	9.56177e-05	NEU4
peak_13939	2.73346	-1.7984	25.6337	4.12762e-07	0.000104891	DPRXP4
peak_22037	2.37046	-1.4825	25.6054	4.18861e-07	0.000105326	SLC19A1
peak_9468	3.25039	-2.34317	25.5973	4.20618e-07	0.000105326	RASA3
peak_25070	2.72379	-1.88836	25.4282	4.59161e-07	0.000114145	MIR95
peak_6082	2.84719	-2.05631	25.3734	4.72387e-07	0.000116588	CCDC87
peak_20906	2.29415	-1.17106	25.1724	5.24264e-07	0.000128467	GINS1
peak_17467	2.44813	-1.41122	25.1559	5.28778e-07	0.000128654	CBLC
peak_29687	2.63555	-1.95631	24.9904	5.76178e-07	0.0001392	HGC6.3
peak_15873	2.44743	-1.59022	24.9596	5.85442e-07	0.000140449	POLRMT
peak_1207	2.113	-0.97525	24.8093	6.32897e-07	0.000150779	LINC00853
peak_29794	4.53034	-2.80384	24.7856	6.40749e-07	0.000151597	LOC101927021
peak_16488	-7.92514	-1.56792	24.5146	7.37478e-07	0.000173287	ZNF844
peak_31708	2.63381	-2.02537	24.4137	7.77159e-07	0.000181369	SLC25A37
peak_21964	3.27706	-2.47172	24.2158	8.61245e-07	0.000199634	AGPAT3
peak_16783	2.80889	-2.07967	24.1473	8.92405e-07	0.000205469	CCDC124
peak_5067	2.62958	-1.95501	24.131	8.99991e-07	0.000205834	PPP2R2D
peak_26229	2.67378	-0.798317	24.0042	9.61264e-07	0.000218252	LINC02116
peak_26194	3.49514	-2.56185	23.9927	9.6701e-07	0.000218252	SLC6A19
peak_21550	2.66063	-1.51192	23.9657	9.80674e-07	0.000219889	HAR1B
peak_2942	2.81036	-1.85469	23.7671	1.08723e-06	0.000242198	TMCC2
peak_31510	3.2293	-2.09344	23.672	1.14232e-06	0.000252585	LOC105377777
peak_27642	2.74548	-1.89422	23.6615	1.14858e-06	0.000252585	LOC105377752
peak_17941	2.36813	-1.45561	23.62	1.17362e-06	0.000254923	LILRA6
peak_3711	1.77468	-0.209018	23.6192	1.17407e-06	0.000254923	CELF2-AS1
peak_12090	2.97294	-2.05829	23.5305	1.22947e-06	0.000265272	MIR4718
peak_24895	2.21125	-0.886834	23.3937	1.32011e-06	0.000283048	PDE6B
peak_22062	2.08209	-1.06793	23.2615	1.41404e-06	0.000300253	FTCD-AS1
peak_17319	3.56533	-2.57286	23.2563	1.41786e-06	0.000300253	CYP2S1
peak_810	2.88	-2.24638	23.0942	1.54258e-06	0.000324661	LAPTM5
peak_24841	2.45934	-1.79931	22.9977	1.62195e-06	0.000339285	ZDHHC19
peak_23889	2.13038	-0.491325	22.9628	1.65171e-06	0.000342709	MIR1284
peak_34267	4.62199	-2.91069	22.9495	1.66317e-06	0.000342709
peak_8637	2.81444	-2.11487	22.9436	1.66829e-06	0.000342709	TMEM132D-AS1
peak_31392	2.77729	-1.87522	22.9153	1.69299e-06	0.00034301	LINC01287
peak_30695	2.49435	-1.81091	22.9078	1.69963e-06	0.00034301	SRI
peak_14083	2.76656	-2.2167	22.9076	1.69975e-06	0.00034301	SRCIN1
peak_31503	3.05256	-2.41563	22.8871	1.71804e-06	0.000344673	ERICH1
peak_11819	3.30517	-2.56283	22.7791	1.81727e-06	0.000362462	SOX8
peak_22534	3.25609	-2.4235	22.752	1.84308e-06	0.000365485	CACNG2
peak_4661	3.72812	-2.6049	22.6024	1.99238e-06	0.000392357	UBTD1
peak_1955	2.58124	-2.08277	22.5936	2.00147e-06	0.000392357	CD160
peak_9439	2.61407	-2.09095	22.4719	2.13242e-06	0.000415651	ADPRHL1
peak_27430	2.2567	-1.54721	22.4232	2.18714e-06	0.000422045	CLINT1
peak_16854	2.4721	-1.68407	22.4209	2.18982e-06	0.000422045	CERS1
peak_29753	2.62726	-1.98671	22.3484	2.27397e-06	0.000435814	LOC101927000
peak_15887	2.88523	-1.8796	22.3275	2.29886e-06	0.000436718	PRTN3
peak_11770	2.05567	-1.1651	22.3129	2.31648e-06	0.000436718	HBA1
peak_29749	2.75701	-1.67168	22.3106	2.31926e-06	0.000436718	LOC442497
peak_801	2.68958	-1.9411	22.302	2.32961e-06	0.000436718	LINC01648
peak_20560	2.55842	-2.0731	22.2503	2.39321e-06	0.000446204	AGXT
peak_21980	2.57615	-1.90307	22.2153	2.43718e-06	0.000451945	PFKL
peak_10412	2.70556	-1.26196	22.0689	2.63039e-06	0.00048515	EVL
peak_32286	2.87293	-2.24461	22.028	2.68699e-06	0.00049294	MIR4471
peak_13107	2.61853	-2.16948	21.9967	2.7312e-06	0.000498386	LINC02182
peak_24930	2.03906	-1.20638	21.9034	2.8672e-06	0.000520434	MAEA
peak_32639	2.13863	-0.949379	21.8753	2.90948e-06	0.000525329	PTP4A3
peak_4945	2.37716	-1.27162	21.8112	3.0084e-06	0.000540346	INPP5F
peak_14992	2.65008	-1.77525	21.7657	3.08053e-06	0.000550421	PRCD
peak_20599	2.31868	-0.224736	21.7361	3.1285e-06	0.000556094	LOC285095
peak_5229	2.39594	-1.62742	21.6441	3.28223e-06	0.000580413	TOLLIP-AS1
peak_3098	2.02496	-0.920601	21.5801	3.39346e-06	0.000597006	NSL1
peak_12268	2.56514	-2.03678	21.4809	3.57368e-06	0.000621517	KDM8
peak_11272	2.23019	-1.65453	21.4757	3.58346e-06	0.000621517	SENP8
peak_31022	2.75763	-2.29282	21.4737	3.58714e-06	0.000621517	MIR592
peak_11783	2.82735	-1.80419	21.2597	4.01073e-06	0.000691418	TMEM8A
peak_21954	2.6259	-1.52677	21.2356	4.06156e-06	0.00069668	PDXK
peak_28553	2.53495	-2.06307	21.1927	4.15353e-06	0.000706099	GLP1R
peak_29195	2.79223	-1.65761	21.1908	4.15764e-06	0.000706099	SMPDL3A
peak_21612	2.20936	1.01708	21.1623	4.21978e-06	0.000712108	PCMTD2
peak_24861	1.8966	-0.902166	21.1556	4.23453e-06	0.000712108	CEP19
peak_4315	1.89597	-0.61386	21.1329	4.28514e-06	0.000717102	C10orf105
peak_24292	2.49561	-1.97913	21.0914	4.37891e-06	0.000727875	H1FX
peak_20842	2.15337	-0.995442	21.0857	4.39195e-06	0.000727875	INSM1
peak_23011	2.4356	-1.53451	21.0729	4.4213e-06	0.000729218	SHANK3
peak_53	2.95588	-2.15937	21.0462	4.48345e-06	0.000735929	TMEM240
peak_33868	2.72213	-1.95297	21.0342	4.51148e-06	0.000737004	FIBCD1
peak_9465	2.75458	-2.24887	21.0247	4.5341e-06	0.000737189	RASA3
peak_15985	1.79095	-0.485819	20.9829	4.6341e-06	0.000749257	BTBD2
peak_29677	2.24383	-1.38422	20.9755	4.65201e-06	0.000749257	LOC105378127
peak_605	2.93336	-2.42721	20.943	4.73155e-06	0.000754664	RHD
peak_21586	2.84643	-2.35799	20.941	4.73645e-06	0.000754664	SLC2A4RG
peak_5960	2.59538	-2.20295	20.9349	4.75157e-06	0.000754664	MIR192
peak_31391	2.407	-1.47469	20.8577	4.94696e-06	0.000782076	ACTR3B
peak_6277	3.05761	-2.33505	20.7795	5.15326e-06	0.000810501	DNAJB13
peak_13062	2.18861	-1.54924	20.7718	5.17401e-06	0.000810501	LOC101928708
peak_3184	2.05315	-1.30564	20.7464	5.24308e-06	0.000815946	CNIH3
peak_21557	2.39026	-1.39524	20.7415	5.25634e-06	0.000815946	KCNQ2
peak_34099	2.29679	-0.756541	20.704	5.36032e-06	0.000828339	EXD3
peak_16599	2.52857	-2.13714	20.6862	5.41053e-06	0.000832348	LOC100507373
peak_12848	2.5821	-1.8127	20.6039	5.64795e-06	0.000864994	MARVELD3
peak_7566	2.59586	-2.12485	20.5077	5.93912e-06	0.000905544	METTL7A
peak_27818	1.94605	-1.42508	20.4532	6.11075e-06	0.00092759	LY86-AS1
peak_13119	2.38491	-1.7734	20.3939	6.30298e-06	0.000950426	ZC3H18-AS1
peak_14276	2.45667	-1.70922	20.3878	6.32306e-06	0.000950426	MIR2117
peak_11820	2.70243	-2.11908	20.3814	6.3443e-06	0.000950426	SOX8
peak_31898	2.19812	-1.52403	20.2887	6.65919e-06	0.000993262	ANK1
peak_18139	5.01622	-3.19247	20.2561	6.77355e-06	0.00100595	SNTG2-AS1
peak_34008	2.1041	-1.35252	20.2352	6.8483e-06	0.00101121	KCNT1
peak_5121	3.20895	-2.29938	20.2297	6.86792e-06	0.00101121	ADGRA1-AS1
peak_15872	1.78941	-0.581456	20.1959	6.99035e-06	0.00102483	HCN2
peak_10	2.54912	-1.96204	20.178	7.05603e-06	0.00103006	HES4
peak_27491	2.33904	-1.92265	20.1476	7.16908e-06	0.00104213	MIR218-2
peak_25009	3.69536	-2.77699	20.1079	7.31945e-06	0.0010595	HGFAC
peak_5175	2.47078	-1.96929	20.0875	7.39775e-06	0.00106633	B4GALNT4
peak_22952	2.34019	-1.32806	20.0736	7.45198e-06	0.00106965	BRD1
peak_6618	2.63549	-2.09714	20.0406	7.58135e-06	0.00108369	LOC105369509
peak_9485	2.7127	-1.16948	20.0248	7.64456e-06	0.00108819	OR11H6
peak_610	2.80493	-2.26415	19.9889	7.78918e-06	0.0011042	RHCE
peak_32858	2.44798	-1.92654	19.9756	7.84368e-06	0.00110735	TTC39B
peak_15814	2.36748	-0.485778	19.8336	8.44852e-06	0.00118604	GALR1
peak_33534	2.64294	-2.2988	19.8287	8.4702e-06	0.00118604	DNAJC25
peak_15955	2.26711	-0.896443	19.8041	8.58004e-06	0.00119653	MEX3D
peak_7139	2.71642	-1.56	19.7962	8.61532e-06	0.00119659	LOC728715
peak_15162	2.01695	-1.42214	19.7329	8.90548e-06	0.0012319	BAIAP2
peak_95	3.01702	-2.3651	19.7087	9.01886e-06	0.00124257	LOC100129534
peak_17241	2.78321	-2.29809	19.6861	9.12628e-06	0.00125235	MIR6719
peak_245	2.08404	-1.56733	19.6597	9.25322e-06	0.00126155	CLSTN1
peak_21139	2.44829	-2.0719	19.6569	9.26693e-06	0.00126155	CTNNBL1
peak_15912	2.30187	-1.84	19.6218	9.43859e-06	0.00127984	ARHGAP45
peak_30854	3.07317	-2.42068	19.5766	9.66439e-06	0.0013053	LOC102724094
peak_22058	2.48	-1.42921	19.4761	1.01868e-05	0.00137047	COL6A2
peak_26162	1.98033	-1.24949	19.3905	1.06537e-05	0.00142768	AHRR
peak_8297	2.90305	-1.98018	19.3614	1.08173e-05	0.00144396	MVK
peak_20410	1.98096	-1.04602	19.3525	1.08679e-05	0.00144509	NGEF
peak_561	3.11005	-2.51506	19.3437	1.0918e-05	0.00144524	GRHL3
peak_15115	2.36206	-1.67507	19.3375	1.09533e-05	0.00144524	RBFOX3
peak_16432	2.27815	-1.15086	19.1872	1.18508e-05	0.00155767	CARM1
peak_27695	3.04664	-2.45605	19.1555	1.20491e-05	0.00157769	RNF130
peak_34249	2.65834	-1.75341	19.1309	1.22053e-05	0.00159207
peak_17769	2.52165	-1.70607	19.1134	1.23178e-05	0.00160066	PRR12
peak_3672	2.27857	-1.01204	19.0899	1.24705e-05	0.00161439	SFMBT2
peak_128	2.70067	-1.73968	19.078	1.2548e-05	0.00161832	ACTRT2
peak_4066	2.36274	-2.00316	19.0664	1.2625e-05	0.00162215	LOC102724323
peak_31442	2.58893	-1.51792	19.0544	1.27046e-05	0.00162629	LOC100506585
peak_17761	1.09049	0.422799	19.0373	1.28191e-05	0.00163484	RCN3
peak_13845	2.26764	-1.06575	19.0233	1.29132e-05	0.00164074	FOXN1
peak_24899	2.08027	-1.31846	19.0078	1.30188e-05	0.00164805	PCGF3
peak_22974	2.4874	-1.50642	18.989	1.31477e-05	0.00165825	TTLL8
peak_13692	3.0074	-2.48861	18.8505	1.41374e-05	0.00177655	FLCN
peak_29523	2.24197	-1.78804	18.8387	1.42249e-05	0.0017775	ARID1B
peak_34046	2.20729	-0.723117	18.8327	1.427e-05	0.0017775	LINC01451
peak_25066	2.92992	-2.5134	18.8286	1.43005e-05	0.0017775	AFAP1-AS1
peak_13796	2.61583	-2.20723	18.7715	1.47354e-05	0.00182496	MAP2K3
peak_1168	1.93362	-1.47403	18.7644	1.47904e-05	0.00182518	UROD
peak_15242	2.31512	-1.81241	18.6898	1.538e-05	0.00189113	NARF
peak_11815	2.31238	-1.57182	18.6555	1.56595e-05	0.00191304	LMF1-AS1
peak_20841	2.30183	-1.51402	18.6543	1.56697e-05	0.00191304	INSM1
peak_17938	1.97628	-1.32755	18.615	1.59956e-05	0.0019459	LILRB3
peak_11440	2.47504	-1.66162	18.5743	1.63408e-05	0.00198088	CTSH
peak_13980	2.46101	-1.83496	18.5266	1.67548e-05	0.00202351	TMEM98
peak_31479	2.28478	-1.56149	18.5203	1.68105e-05	0.00202351	LINC00689
peak_3447	2.16536	-1.30644	18.4931	1.70521e-05	0.00204542	LINC02774
peak_21975	2.47195	-2.00645	18.4699	1.72607e-05	0.00205715	LINC01678
peak_15422	2.53158	-1.96059	18.4689	1.72699e-05	0.00205715	LDLRAD4
peak_30651	2.80627	-1.69419	18.44	1.75337e-05	0.00208135	DTX2P1-UPK3BP1-PMS2P11
peak_23588	2.51353	-2.05841	18.4003	1.7903e-05	0.00211786	MAP4
peak_15415	2.87452	-2.49671	18.3621	1.82659e-05	0.00215337	CEP192
peak_31507	2.25769	-1.96373	18.3284	1.85919e-05	0.00218429	LOC105377777
peak_15282	2.061	-1.78327	18.3154	1.87189e-05	0.00219171	METRNL
peak_19298	2.77797	-2.00826	18.2842	1.90278e-05	0.00222029	PANTR1
peak_32642	2.28603	-1.94249	18.2333	1.95428e-05	0.00227266	MROH5
peak_9440	1.84388	-0.102082	18.1916	1.99757e-05	0.00231516	ADPRHL1
peak_22272	2.70411	-2.23496	18.169	2.02138e-05	0.00233487	IGLL5
peak_17686	2.20713	-1.58753	18.1225	2.07137e-05	0.00238458	CYTH2
peak_18457	5.55288	-3.46251	18.1119	2.08298e-05	0.00238992	C2orf16
peak_7685	3.21082	-2.72594	18.0568	2.14416e-05	0.00245192	HOXC4
peak_22133	1.63598	-1.04928	18.0211	2.18475e-05	0.00248922	MIR648
peak_22483	2.55951	-2.31192	18.01	2.1975e-05	0.00248922	ISX-AS1
peak_13231	2.4595	-1.68537	18.0091	2.19855e-05	0.00248922	RPH3AL
peak_13058	2.33119	-2.10934	17.9909	2.21969e-05	0.00249712	LINC02188
peak_5114	2.33256	-2.06782	17.9905	2.22008e-05	0.00249712	NKX6-2
peak_31509	2.61547	-1.52976	17.9342	2.28678e-05	0.00256373	LOC105377777
peak_21733	2.43705	-2.03094	17.8615	2.37577e-05	0.00265483	SCAF4
peak_33246	2.46955	-2.08224	17.7221	2.55639e-05	0.00284702	CTSL3P
peak_27947	2.4428	-1.89439	17.7162	2.56436e-05	0.00284702	JARID2
peak_22405	2.56238	-2.07615	17.6937	2.59482e-05	0.00287154	ASCC2
peak_7	2.39941	-1.94622	17.6765	2.61837e-05	0.00287328	PLEKHN1
peak_33992	2.22937	-2.07217	17.6748	2.62075e-05	0.00287328	RXRA
peak_4953	2.76586	-2.51228	17.6743	2.62151e-05	0.00287328	FGFR2
peak_13271	3.1558	-2.57269	17.629	2.68469e-05	0.00293316	TRARG1
peak_500	2.87488	-2.45338	17.6097	2.71201e-05	0.0029446	RAP1GAP
peak_16382	1.75759	-1.22606	17.6064	2.71669e-05	0.0029446	ICAM5
peak_8759	3.21679	-2.67925	17.6035	2.72092e-05	0.0029446	LINC00539
peak_30121	2.22998	-1.54063	17.5855	2.74675e-05	0.00296321	HOXA1
peak_20884	2.64848	-2.29886	17.5519	2.79564e-05	0.0030065	CST7
peak_5328	2.37575	-2.08386	17.5032	2.86824e-05	0.00307494	HBE1
peak_24722	3.04525	-2.63683	17.4684	2.92127e-05	0.00312203	KNG1
peak_9464	2.17753	-1.86062	17.444	2.95903e-05	0.00315256	RASA3
peak_29725	1.34715	-0.08559	17.4245	2.98945e-05	0.00317511	LOC102724511
peak_24892	2.3768	-1.03637	17.4125	3.00842e-05	0.0031854	TMEM271
peak_3481	1.90605	-0.413497	17.3268	3.14725e-05	0.00332214	LINC01341
peak_1546	-1.58099	-0.047053	17.2942	3.20161e-05	0.00336388	CDC7
peak_21546	2.64615	-2.38367	17.286	3.2155e-05	0.00336388	BHLHE23
peak_16210	2.31545	-2.14197	17.2856	3.21621e-05	0.00336388	RFX2
peak_26667	2.29724	-2.05702	17.2339	3.30484e-05	0.00344608	F2RL1
peak_34141	-1.23116	0.768234	17.2049	3.35568e-05	0.00348849	LOC389831
peak_10573	2.59308	-1.65275	17.195	3.37321e-05	0.00349611	LOC105370697
peak_3999	2.96737	-2.2416	17.1736	3.41144e-05	0.00352509	FZD8
peak_45	2.63956	-1.8395	17.1669	3.42353e-05	0.00352695	TMEM88B
peak_22710	2.7702	-2.467	17.1509	3.45241e-05	0.00354606	MRTFA-AS1
peak_10697	2.41579	-2.17814	17.0982	3.54951e-05	0.00362033	KLF13
peak_16087	2.27208	-2.04527	17.0954	3.55489e-05	0.00362033	SMIM24
peak_10694	2.32195	-2.06459	17.0896	3.56563e-05	0.00362033	LOC283710
peak_26224	2.94472	-2.51772	17.0889	3.56693e-05	0.00362033	LOC728613
peak_3567	2.5066	-2.17055	17.056	3.62939e-05	0.00367285	ADARB2-AS1
peak_21620	2.17244	-1.75718	17.0398	3.66047e-05	0.00369342	MIR3648-2
peak_17208	2.2106	-1.87403	16.9904	3.75695e-05	0.00377965	FBXO17
peak_8007	2.04176	-0.896508	16.9774	3.7827e-05	0.00379443	OTOGL
peak_21548	2.69139	-2.23318	16.966	3.80556e-05	0.00380622	LINC00029
peak_9418	2.28883	-2.09128	16.9584	3.82072e-05	0.00381028	MCF2L-AS1
peak_10762	3.1267	-2.61134	16.9371	3.86386e-05	0.00384214	GPR176
peak_15287	2.53128	-2.1408	16.9161	3.90696e-05	0.00387377	METRNL
peak_11366	2.40286	-1.31298	16.9029	3.93417e-05	0.0038895	SIN3A
peak_485	2.96741	-2.66524	16.8819	3.97795e-05	0.00392148	HP1BP3
peak_15414	2.68044	-2.43955	16.8554	4.03389e-05	0.00396524	CEP192
peak_25948	2.33332	-1.33166	16.8481	4.04942e-05	0.00396912	TRIM2
peak_13488	2.47161	-2.28213	16.8381	4.07069e-05	0.0039786	MIR324
peak_7496	2.50881	-1.7067	16.8188	4.11246e-05	0.00400801	DDX23
peak_5122	2.9626	-2.47937	16.808	4.13587e-05	0.00401941	ADGRA1-AS1
peak_21152	2.00343	-1.39127	16.7668	4.22673e-05	0.00408619	RALGAPB
peak_15892	1.79374	-1.47287	16.766	4.2284e-05	0.00408619	RNU6-7
peak_29654	1.92497	-0.510072	16.6678	4.45313e-05	0.00429127	RPS6KA2-IT1
peak_4622	1.92661	-1.35645	16.6562	4.48046e-05	0.00430539	ENTPD1
peak_970	2.16979	-1.31229	16.6509	4.49288e-05	0.00430539	GRIK3
peak_22438	3.50453	-2.94431	16.5609	4.71122e-05	0.00450204	SMTN
peak_31301	1.91094	-0.974779	16.5547	4.72657e-05	0.00450416	ZNF746
peak_4076	3.68485	-3.03243	16.5485	4.74218e-05	0.00450616	SNORA74C-1
peak_27135	2.29364	-2.01612	16.5434	4.75494e-05	0.00450616	SIL1
peak_74	2.8692	-2.45322	16.4801	4.91628e-05	0.00464222	CFAP74
peak_14005	2.86918	-2.45322	16.4765	4.92558e-05	0.00464222	SLC35G3
peak_5327	2.48326	-2.37637	16.4318	5.04332e-05	0.00473192	HBE1
peak_29723	2.47308	-1.38753	16.4299	5.04834e-05	0.00473192	LOC102724511
peak_26327	1.91526	-0.977097	16.4204	5.07357e-05	0.00474261	CDH9
peak_25035	2.27448	-1.40526	16.3876	5.16223e-05	0.00481237	MAN2B2
peak_18150	2.34857	-1.36057	16.369	5.21304e-05	0.00483737	LINC01250
peak_16280	1.93167	-1.44174	16.3669	5.21876e-05	0.00483737	STXBP2
peak_27903	-1.4419	-0.105868	16.3576	5.24456e-05	0.00483737	GFOD1
peak_16547	1.41134	-0.732809	16.3573	5.24544e-05	0.00483737	LYL1
peak_24350	2.72356	-2.5474	16.3391	5.29604e-05	0.00487094	CLDN18
peak_22943	2.97037	-2.61794	16.2932	5.4257e-05	0.00497685	LINC01310
peak_31446	2.01034	-1.36954	16.2801	5.46352e-05	0.00499702	LOC100506585
peak_24877	2.02249	-1.54008	16.2728	5.48447e-05	0.00499702	LRCH3
peak_13146	2.68208	-2.08341	16.2704	5.49139e-05	0.00499702	LOC101927793
peak_20582	1.84209	-1.26505	16.2449	5.56604e-05	0.00504751	BOK-AS1
peak_26760	2.33235	-1.8557	16.2414	5.5763e-05	0.00504751	ADGRV1
peak_11822	2.32505	-0.111912	16.2191	5.64235e-05	0.00509386	CACNA1H
peak_18014	2.30695	-1.8793	16.184	5.74766e-05	0.00517531	ZNF865
peak_15252	2.30939	-1.78224	16.161	5.81793e-05	0.00522486	MIR4525
peak_2892	2.58121	-2.15978	16.1065	5.98766e-05	0.00535632	OPTC
peak_21560	2.0716	-0.911814	16.1041	5.99553e-05	0.00535632	EEF1A2
peak_11320	2.61008	-2.2883	16.0938	6.02823e-05	0.00536283	CLK3
peak_8950	2.16115	-2.08402	16.0906	6.03841e-05	0.00536283	TPTE2P5
peak_13359	2.55933	-1.78416	16.0804	6.0708e-05	0.00536283	OR1E1
peak_30346	2.48742	-2.37809	16.0784	6.07748e-05	0.00536283	OGDH
peak_26165	2.5255	-2.38985	16.0773	6.08098e-05	0.00536283	EXOC3-AS1
peak_1232	2.91161	-2.55502	16.0583	6.14214e-05	0.00539812	TTC39A
peak_15903	2.21577	-1.98696	16.0551	6.15247e-05	0.00539812	GRIN3B
peak_21614	1.95581	-1.12643	15.9878	6.3751e-05	0.00557919	PCMTD2
peak_27147	2.09615	-1.97764	15.9615	6.46443e-05	0.00564297	ECSCR
peak_17006	2.52546	-2.219	15.9164	6.62018e-05	0.00576426	TDRD12
peak_32775	2.46516	-0.509726	15.8967	6.68952e-05	0.00580989	KANK1
peak_3562	3.25896	-2.78833	15.8649	6.80282e-05	0.00589338	LINC00200
peak_17630	2.11351	-1.58067	15.857	6.83149e-05	0.0059033	MEIS3
peak_4600	1.91785	-1.58524	15.843	6.88196e-05	0.00593197	CYP26C1
peak_26033	1.7758	-1.28706	15.8291	6.93276e-05	0.00596078	PALLD
peak_28814	2.39166	-2.25458	15.8059	7.01836e-05	0.00601929	OGFRL1
peak_16400	2.28762	-2.1318	15.7756	7.13181e-05	0.00609335	PDE4A
peak_9700	1.80379	-0.788275	15.7733	7.14023e-05	0.00609335	LRFN5
peak_17598	2.99353	-2.72304	15.76	7.19074e-05	0.00611353	NPAS1
peak_34129	2.21487	-2.14592	15.7577	7.19951e-05	0.00611353	TUBBP5
peak_15338	2.3315	-2.19069	15.7255	7.32314e-05	0.00620315	DLGAP1-AS2
peak_5125	2.21927	-2.06518	15.6934	7.44849e-05	0.00629379	KNDC1
peak_2228	2.15561	-1.57003	15.6862	7.47658e-05	0.006302	MUC1
peak_13164	2.39414	-2.09359	15.6796	7.50309e-05	0.00630885	LOC105371414
peak_5088	1.89692	-0.469145	15.6668	7.55382e-05	0.00633598	LRRC27
peak_20534	1.92114	-0.961178	15.648	7.6294e-05	0.00638376	LOC150935
peak_10224	2.13816	-2.03352	15.6341	7.68549e-05	0.00641505	FOXN3
peak_1072	2.52285	-2.30138	15.625	7.72248e-05	0.00643028	EDN2
peak_1246	2.15689	-1.85467	15.616	7.75949e-05	0.00644545	ZFYVE9
peak_11825	2.64519	-2.34273	15.606	7.80047e-05	0.00645384	TPSAB1
peak_14307	2.64518	-2.34273	15.6044	7.80722e-05	0.00645384	SLC4A1
peak_8433	2.19904	-2.0987	15.5959	7.84252e-05	0.00646744	CIT
peak_22946	2.15199	-1.30755	15.584	7.89206e-05	0.00649105	MIR3667
peak_7532	1.99971	-0.843245	15.5789	7.91312e-05	0.00649105	LOC100335030
peak_15857	1.80766	-0.771513	15.5754	7.92791e-05	0.00649105	PLPP2
peak_4100	2.10712	-1.87001	15.5694	7.95321e-05	0.00649626	GDF2
peak_12110	2.16758	-1.43845	15.5621	7.98411e-05	0.00650385	LOC100288162
peak_31531	-1.40955	0.126122	15.5582	8.00042e-05	0.00650385	MIR7160
peak_4938	2.29985	-1.87809	15.552	8.02675e-05	0.00650982	RGS10
peak_21555	1.91813	-1.55557	15.5448	8.05729e-05	0.00651918	COL20A1
peak_33244	1.67148	-1.18423	15.5278	8.13022e-05	0.00656271	CTSL
peak_16117	2.37768	-0.75234	15.5083	8.2142e-05	0.00661493	NMRK2
peak_13090	1.97105	-1.70815	15.4815	8.33185e-05	0.00669397	MIR11401
peak_11809	2.33709	-1.85933	15.4675	8.39376e-05	0.00671625	MIR662
peak_20486	-1.40097	0.0730903	15.4663	8.39874e-05	0.00671625	RAMP1
peak_10233	2.50166	-2.29435	15.4134	8.63743e-05	0.00689106	FOXN3
peak_11827	2.00932	-1.00261	15.4023	8.68827e-05	0.00691554	TPSD1
peak_22206	2.27056	-2.16833	15.3867	8.76046e-05	0.00695686	AIFM3
peak_17309	1.91782	-1.78959	15.3632	8.87007e-05	0.00702763	CYP2B6
peak_27957	1.92874	-1.20789	15.3295	9.02975e-05	0.00713766	JARID2
peak_1454	3.61513	-3.07681	15.3201	9.07465e-05	0.00715667	NEXN
peak_22799	2.25371	-1.92985	15.281	9.26415e-05	0.00728324	ARFGAP3
peak_28430	2.22515	-1.99109	15.2783	9.27761e-05	0.00728324	NUDT3
peak_11000	2.19865	-1.98117	15.2694	9.32139e-05	0.0073009	RFX7
peak_16564	2.7497	-2.55599	15.265	9.34298e-05	0.00730114	MRI1
peak_16194	2.2094	-2.02343	15.2517	9.40905e-05	0.00732624	RPL36
peak_30518	3.11593	-2.80499	15.2468	9.43348e-05	0.00732624	GALNT17
peak_14722	2.74369	-2.55429	15.2457	9.43916e-05	0.00732624	PECAM1
peak_29679	2.74367	-2.55429	15.2407	9.46401e-05	0.00732895	LOC105378127
peak_16109	2.05325	-1.88334	15.2101	9.61853e-05	0.00743183	APBA3
peak_34232	1.60006	-0.867048	15.2033	9.65346e-05	0.00744206
peak_8343	2.32167	-1.21923	15.1908	9.71748e-05	0.00746061	LOC105369980
peak_30650	2.07589	-0.628249	15.1901	9.72102e-05	0.00746061	DTX2P1-UPK3BP1-PMS2P11
peak_33692	2.08985	-1.8988	15.1547	9.90515e-05	0.00758496	PBX3
peak_9431	2.24182	-1.78895	15.1439	9.96204e-05	0.00761153	CUL4A
peak_12117	1.84063	-1.64951	15.1298	0.000100364	0.0076513	PKD1P6-NPIPP1
peak_31449	2.32176	-0.701668	15.1117	0.000101332	0.00770146	LOC100506585
peak_29055	2.37527	-2.24936	15.1091	0.000101471	0.00770146	SNX3
peak_31450	2.22105	-2.19154	15.0888	0.000102571	0.00776776	LOC100506585
peak_13186	2.66163	-2.22805	15.0836	0.000102851	0.00777181	DPEP1
peak_27371	1.7786	-0.758157	15.0181	0.000106487	0.0080289	GRIA1
peak_17646	2.35084	-2.19827	15.0006	0.000107476	0.00807337	EHD2
peak_18124	2.51586	-1.70969	14.9994	0.000107548	0.00807337	LINC01874
peak_33964	2.86031	-2.41243	14.9817	0.000108559	0.00813147	DBH-AS1
peak_6935	3.01481	-2.62907	14.9674	0.000109384	0.00816388	IQSEC3
peak_3486	1.91794	-1.82639	14.9656	0.00010949	0.00816388	ZNF695
peak_27571	2.2911	-1.54512	14.9619	0.000109705	0.00816388	C5orf47
peak_7138	3.57503	-2.76303	14.9294	0.000111607	0.00828745	LOC728715
peak_8653	2.43031	-2.26991	14.9211	0.0001121	0.00830127	LINC02370
peak_29832	2.23973	-1.92498	14.9165	0.000112378	0.00830127	SNX8
peak_21830	1.97481	-1.52131	14.9141	0.000112519	0.00830127	CLDN14
peak_17007	2.68018	-2.19689	14.9079	0.000112887	0.00831054	TDRD12
peak_18406	2.2913	-1.62865	14.9035	0.00011315	0.00831207	DTNB
peak_11595	1.83761	-1.64858	14.892	0.000113844	0.00834514	SEMA4B
peak_33245	2.00199	-1.90063	14.8692	0.000115227	0.00841334	CTSL3P
peak_29716	1.66495	-1.156	14.8686	0.000115265	0.00841334	LINC00242
peak_21985	2.04551	-1.91924	14.8521	0.00011628	0.00846855	TRPM2
peak_8511	1.88912	-1.45295	14.8483	0.000116515	0.00846855	TMEM120B
peak_33209	2.26478	-2.00797	14.834	0.000117399	0.00851475	GKAP1
peak_29754	2.10279	-1.97989	14.7671	0.000121638	0.00880359	LOC101927000
peak_30830	2.74032	-2.46129	14.7283	0.000124166	0.00896762	AGFG2
peak_16487	-7.00219	-2.37875	14.7225	0.00012455	0.00897653	ZNF844
peak_16015	2.28771	-1.98065	14.7106	0.000125337	0.00901428	TMPRSS9
peak_15264	2.0025	-1.97863	14.6998	0.000126061	0.00904735	ZNF750
peak_21441	2.27606	-2.05063	14.6873	0.000126899	0.00908849	CTCFL
peak_17026	2.72736	-2.55047	14.6705	0.000128037	0.00914201	LSM14A
peak_22547	2.08462	-1.18818	14.6684	0.000128179	0.00914201	TMPRSS6
peak_6232	2.56898	-2.27618	14.6619	0.000128618	0.00915428	CLPB
peak_5232	1.59925	-0.769243	14.6578	0.000128901	0.00915543	MOB2
peak_18246	1.80307	-1.41672	14.6467	0.000129664	0.00917578	CYS1
peak_8698	2.14894	-1.38204	14.6458	0.000129722	0.00917578	GOLGA3
peak_24948	3.01145	-2.67969	14.6176	0.000131677	0.00929486	LETM1
peak_4052	2.90653	-2.04364	14.57	0.000135046	0.00948296	TMEM72
peak_27641	3.39463	-2.37952	14.5681	0.000135181	0.00948296	LOC105377752
peak_10641	1.52188	-0.723503	14.5645	0.000135444	0.00948296	UBE3A
peak_25339	2.10644	-1.76763	14.5644	0.000135447	0.00948296	SCFD2
peak_1137	1.01755	0.168285	14.5557	0.000136075	0.00950754	SLC6A9
peak_21036	1.7859	-1.04824	14.5495	0.000136521	0.00951931	EIF2S2
peak_16788	3.14542	-2.86764	14.5452	0.000136834	0.00952178	ARRDC2
peak_30845	1.96669	-1.9681	14.5274	0.000138137	0.00959296	GIGYF1
peak_9441	2.27706	-1.90562	14.4769	0.000141888	0.00983355	ADPRHL1
peak_20683	2.13795	-2.11573	14.469	0.000142482	0.0098548	UBOX5-AS1
peak_18130	1.84614	-1.5855	14.4607	0.000143113	0.00987857	LOC105373352
peak_13706	3.02579	-2.83729	14.4393	0.000144749	0.00997139	SMCR2
peak_2904	2.13582	-1.3272	14.4223	0.000146063	0.0100268	SNRPE
peak_26052	3.3261	-2.90787	14.4202	0.000146224	0.0100268	MFAP3L
peak_4738	2.15627	-2.00331	14.4154	0.000146598	0.0100268	ARMH3
peak_114	1.53766	1.35618	14.4138	0.000146722	0.0100268	MMEL1
peak_22143	1.07649	-0.113749	14.4085	0.000147138	0.0100352	SLC25A1
peak_14118	2.41021	-2.22161	14.4028	0.000147585	0.0100457	MIR548BC
peak_6336	2.28098	-2.25877	14.3849	0.00014899	0.0101213	UVRAG
peak_3037	2.39091	-2.43943	14.3785	0.000149501	0.0101359	LINC01774
peak_30652	1.92469	-1.59039	14.3553	0.000151355	0.0102414	SPDYE11
peak_30649	2.292	-1.60294	14.3425	0.000152388	0.0102702	DTX2P1-UPK3BP1-PMS2P11
peak_29922	1.73259	-1.50368	14.3407	0.000152532	0.0102702	ACTB
peak_8952	2.1202	-1.80735	14.3389	0.000152678	0.0102702	ELF1
peak_34100	2.38713	-1.95006	14.2782	0.000157679	0.0105858	EXD3
peak_12672	2.11507	-1.91086	14.2733	0.000158095	0.010593	GINS3
peak_5109	2.14368	-1.99793	14.2638	0.000158893	0.0106065	INPP5A
peak_16216	2.40491	-1.99194	14.2635	0.000158915	0.0106065	MLLT1
peak_135	3.09757	-2.80091	14.257	0.000159466	0.0106226	WRAP73
peak_4111	2.25872	-2.12339	14.2463	0.000160376	0.0106625	ARHGAP22
peak_22131	1.86407	-1.76511	14.2191	0.000162708	0.0107967	MIR648
peak_44	2.22084	-2.06875	14.1911	0.000165146	0.0109373	ANKRD65
peak_31458	1.95405	-1.63798	14.1715	0.000166877	0.0110306	MIR595
peak_22197	2.32593	-1.99747	14.1647	0.000167484	0.0110494	POM121L4P
peak_10829	2.24515	-2.29063	14.1419	0.000169526	0.0111493	ITPKA
peak_21559	2.86242	-2.08142	14.1396	0.000169729	0.0111493	KCNQ2
peak_698	3.03385	-2.78785	14.1369	0.000169973	0.0111493	TENT5B
peak_21120	2.3051	-1.95369	14.1308	0.00017053	0.0111645	SAMHD1
peak_8364	2.08663	-1.38219	14.1041	0.000172967	0.0113025	TMEM116
peak_5237	1.81672	0.502954	14.0939	0.000173908	0.0113423	FAM99A
peak_15846	2.20044	-1.74353	14.0761	0.000175557	0.0114282	CTDP1
peak_32745	2.08369	-1.89822	14.0458	0.000178412	0.0115921	ARHGAP39
peak_21455	1.98823	-1.97195	14.0282	0.000180088	0.0116785	ANKRD60
peak_3531	1.6311	-1.3609	14.0247	0.000180424	0.0116785	LOC101930421
peak_13665	2.04766	-1.77733	14.0191	0.000180966	0.0116916	TRPV2
peak_32863	1.87465	-1.73611	14.0114	0.000181702	0.011717	SNAPC3
peak_9461	2.41728	-2.44843	13.9849	0.000184287	0.0118615	RASA3
peak_6201	1.87014	-1.09063	13.9767	0.000185093	0.011891	SHANK2
peak_22322	2.6309	-2.52132	13.9694	0.000185815	0.0119151	SPECC1L
peak_5089	1.94221	-1.8745	13.9209	0.000190664	0.0122032	PWWP2B
peak_6046	3.65105	-2.92544	13.8809	0.000194765	0.0124425	SART1
peak_15897	1.80423	-1.73928	13.8383	0.000199237	0.0127045	ARID3A
peak_21939	2.37838	-2.38707	13.831	0.000200005	0.0127068	CRYAA2
peak_20409	2.51364	-2.34529	13.831	0.000200014	0.0127068	SNORC
peak_21461	2.35362	-1.80649	13.8166	0.000201543	0.0127803	VAPB
peak_14962	1.83774	-1.82859	13.8044	0.000202859	0.01284	CDK3
peak_29611	3.23453	-2.99933	13.786	0.000204854	0.012932	SLC22A1
peak_3564	2.32734	-1.9263	13.7841	0.000205067	0.012932	LINC00200
peak_13061	2.28641	-1.46889	13.7485	0.000208984	0.0131549	LOC101928708
peak_2286	2.30221	-2.40752	13.7384	0.000210118	0.013202	TSACC
peak_26143	-2.03976	-0.525583	13.7175	0.00021247	0.0133062	CYP4V2
peak_26522	2.58988	-2.55696	13.7167	0.000212551	0.0133062	C5orf67
peak_17802	2.39787	-2.39414	13.7127	0.000213012	0.0133107	MYH14
peak_32574	2.74079	-2.70499	13.6961	0.000214896	0.0133667	ST3GAL1
peak_6915	2.35157	-2.33141	13.6952	0.000215	0.0133667	SPATA19
peak_55	1.90671	-1.30108	13.6922	0.000215342	0.0133667	FNDC10
peak_3120	1.94307	-1.95259	13.6889	0.000215724	0.0133667	LYPLAL1-AS1
peak_30106	1.94819	-1.24525	13.6878	0.000215857	0.0133667	NFE2L3
peak_22940	2.88431	-2.60116	13.656	0.000219539	0.0135703	MIR4535
peak_22292	1.84083	-1.21947	13.6416	0.000221225	0.0136499	LINC01659
peak_4524	1.99803	-1.86212	13.629	0.000222718	0.0137174	GLUD1
peak_12134	2.69961	-2.54493	13.5983	0.000226389	0.0139185	LOC100288162
peak_18773	2.06788	-2.04679	13.5922	0.000227124	0.0139387	MIR4432HG
peak_15869	1.51764	-0.900253	13.576	0.000229091	0.0140343	GZMM
peak_1879	2.23457	-1.89227	13.5639	0.000230581	0.0141004	MAN1A2
peak_5117	2.57921	-2.02386	13.542	0.000233278	0.0142399	CFAP46
peak_2319	2.15464	-2.00424	13.5238	0.000235558	0.0143536	LRRC71
peak_11029	2.40492	-2.44475	13.5073	0.000237643	0.0144549	HSP90AB4P
peak_32673	2.26427	-1.87023	13.4889	0.000239977	0.0145538	TOP1MT
peak_4137	2.93198	-2.4377	13.4878	0.000240118	0.0145538	SGMS1
peak_22137	2.72438	-2.64665	13.4753	0.000241722	0.0146252	DGCR11
peak_2097	1.94789	-1.10702	13.4486	0.00024519	0.0147964	SEMA6C
peak_3114	3.01149	-2.63559	13.4467	0.000245442	0.0147964	GPATCH2
peak_26326	2.02293	-2.02772	13.4436	0.000245844	0.0147964	CDH9
peak_21880	2.42221	-1.96654	13.4036	0.000251146	0.015089	LINC00111
peak_803	1.88043	-1.31528	13.3656	0.000256275	0.0153703	MATN1-AS1
peak_17758	1.50985	-1.07952	13.3548	0.00025776	0.0154323	FCGRT
peak_1230	2.45169	-2.5104	13.3443	0.000259203	0.0154861	LINC01562
peak_12959	2.24207	-2.07941	13.3418	0.000259562	0.0154861	PLCG2
peak_25056	2.80962	-2.57808	13.337	0.000260219	0.0154984	CCDC96
peak_14779	1.197	-0.517605	13.3272	0.000261586	0.0155528	HELZ
peak_4634	2.36563	-2.38346	13.3228	0.000262195	0.0155621	TM9SF3
peak_7115	2.59957	-2.42135	13.318	0.000262865	0.0155749	FAM66C
peak_9799	2.00682	-1.13381	13.3068	0.000264447	0.0156416	CDKN3
peak_10633	2.03135	-2.07315	13.3024	0.000265073	0.0156516	MAGEL2
peak_5054	1.78524	-1.00682	13.2865	0.000267323	0.0157565	MIR378C
peak_1682	2.25455	-2.39031	13.2834	0.000267767	0.0157565	NBPF6
peak_18957	1.85507	-1.83563	13.2726	0.000269308	0.01582	DYSF
peak_29843	2.55098	-2.59502	13.2627	0.000270738	0.0158768	GRIFIN
peak_16667	1.8837	-1.81113	13.2458	0.000273196	0.0159889	WIZ
peak_113	1.51366	0.485434	13.2431	0.000273582	0.0159889	MMEL1
peak_1275	2.15792	-2.16879	13.2231	0.00027652	0.0161331	SLC25A3P1
peak_22025	2.16304	-1.66929	13.1943	0.000280803	0.0163552	ADARB1
peak_34113	2.01846	-0.670934	13.1726	0.000284069	0.0165174	PNPLA7
peak_26196	2.14866	-1.49229	13.1659	0.000285093	0.0165489	TERT
peak_21118	2.16031	-1.89761	13.1624	0.000285621	0.0165515	SAMHD1
peak_20943	1.95341	-1.70318	13.1501	0.000287507	0.0166327	DEFB124
peak_29703	1.66334	-0.881312	13.1387	0.000289263	0.0167062	THBS2
peak_486	1.97371	-2.1372	13.1302	0.000290571	0.0167421	HP1BP3
peak_15986	1.64871	-0.772692	13.1283	0.000290861	0.0167421	BTBD2
peak_16407	1.04607	-0.0749538	13.1248	0.000291409	0.0167455	ATG4D
peak_15698	2.12416	-1.68372	13.1129	0.000293275	0.0168246	NEDD4L
peak_30966	1.9457	-1.42733	13.1051	0.000294499	0.0168666	LAMB4
peak_6936	2.5172	-0.871347	13.0936	0.000296303	0.0169416	LOC574538
peak_10938	2.22348	-2.28366	13.0808	0.000298331	0.0170292	SLC27A2
peak_345	3.38518	-2.6856	13.0702	0.000300024	0.0170903	PRAMEF15
peak_29947	2.32728	-2.03887	13.0679	0.000300398	0.0170903	CYTH3
peak_16944	2.64672	-2.48293	13.0622	0.00030132	0.0171144	ZNF728
peak_12727	1.77513	-1.61975	13.0367	0.000305453	0.0173205	TMEM208
peak_29538	2.49537	-2.43133	13.0263	0.000307145	0.0173751	SNX9
peak_17844	-1.1413	0.199979	13.0246	0.00030743	0.0173751	NKG7
peak_10666	2.5439	-2.59334	13.0153	0.000308962	0.017433	APBA2
peak_21508	2.34514	-2.04534	13.0119	0.000309519	0.0174357	SS18L1
peak_31453	2.03924	-2.11991	12.9572	0.000318692	0.0179231	MIR595
peak_7948	2.84107	-2.84421	12.9311	0.000323163	0.0181447	LRRC10
peak_10540	2.67276	-2.63279	12.9101	0.000326812	0.0183196	CEP170B
peak_17586	1.96734	-1.16347	12.8875	0.000330777	0.0185116	STRN4
peak_27789	2.50925	-2.58039	12.8602	0.000335645	0.0187535	CDYL
peak_11764	2.50575	-2.43501	12.8515	0.000337215	0.0188106	NPRL3
peak_22807	2.25745	-1.93794	12.8288	0.000341325	0.0190089	PACSIN2
peak_15260	-1.97304	-1.13906	12.7852	0.000349379	0.0194259	ZNF750
peak_7092	2.2642	-1.87205	12.7608	0.00035396	0.0196465	PEX5
peak_10802	1.83545	-1.7177	12.7551	0.000355032	0.0196465	RMDN3
peak_15834	2.26677	-2.39498	12.755	0.000355064	0.0196465	LOC284240
peak_21319	-1.81698	-0.327139	12.7482	0.000356343	0.0196772	B4GALT5
peak_3679	2.34692	-2.33136	12.746	0.000356766	0.0196772	ITIH5
peak_14452	1.97379	-2.09375	12.7216	0.000361463	0.0199016	IGF2BP1
peak_17650	2.06878	-1.82426	12.7188	0.000361995	0.0199016	EHD2
peak_22657	-1.82934	-0.965886	12.7114	0.000363443	0.0199492	APOBEC3H
peak_12304	1.8675	-1.73312	12.6722	0.000371138	0.0203234	SBK1
peak_10864	2.02274	-1.46223	12.6706	0.000371444	0.0203234	UBR1
peak_16200	1.88841	-1.70813	12.6553	0.000374508	0.0204584	FUT5
peak_15341	2.29079	-1.88511	12.6242	0.00038079	0.0207609	DLGAP1
peak_7694	2.32859	-2.51847	12.6215	0.00038134	0.0207609	NFE2
peak_9408	2.03769	-0.469766	12.6177	0.000382106	0.0207609	TUBGCP3
peak_4506	1.73858	-1.41472	12.616	0.000382467	0.0207609	CCSER2
peak_29948	2.10063	-2.1041	12.5943	0.000386925	0.0209517	CYTH3
peak_16144	2.10062	-2.1041	12.593	0.000387203	0.0209517	FSD1
peak_22296	2.32461	-2.23722	12.5887	0.000388085	0.0209664	IGLL1
peak_13587	1.98426	-2.09666	12.5801	0.000389886	0.0210305	MFSD6L
peak_5324	2.97537	-2.77802	12.546	0.000397065	0.0213489	HBG1
peak_14673	2.54002	-2.36033	12.5436	0.000397558	0.0213489	LOC105371855
peak_13984	2.46923	-1.89008	12.5432	0.000397656	0.0213489	ASIC2
peak_2644	1.80949	-1.4793	12.5383	0.000398688	0.0213709	FAM20B
peak_7783	2.09901	-1.7695	12.5266	0.000401205	0.0214681	HSD17B6
peak_1674	-3.10703	-1.92269	12.524	0.000401753	0.0214681	VAV3-AS1
peak_28338	2.56049	-2.40708	12.5174	0.000403183	0.021504	HLA-DRB1
peak_30357	1.87196	-2.04868	12.5151	0.000403678	0.021504	PURB
peak_29657	1.48077	-0.608069	12.5026	0.000406379	0.0215931	RPS6KA2
peak_23589	1.83203	-1.90569	12.5016	0.000406609	0.0215931	MAP4
peak_21012	2.02237	-1.95054	12.4948	0.000408086	0.021638	CDK5RAP1
peak_784	1.11381	-0.433322	12.4878	0.000409614	0.0216855	GMEB1
peak_33264	2.38677	-2.53967	12.4671	0.000414176	0.0218933
peak_14973	1.64361	-1.49095	12.4612	0.000415504	0.0219006	RNF157
peak_17318	2.27819	-2.21889	12.4608	0.000415591	0.0219006	CYP2S1
peak_11763	1.96812	-2.00575	12.4509	0.000417798	0.0219831	NPRL3
peak_26559	1.76021	-0.851595	12.4461	0.000418875	0.022006	IPO11-LRRC70
peak_17648	2.16198	-2.21529	12.4348	0.000421406	0.0221051	EHD2
peak_17312	2.98282	-2.82904	12.4142	0.000426082	0.0223163	CYP2F1
peak_33194	-2.99606	-2.02966	12.405	0.000428192	0.0223926	TLE4
peak_20600	1.64111	-0.850995	12.4003	0.000429263	0.0224145	LOC285095
peak_31447	2.11216	-1.50411	12.3859	0.000432587	0.0225501	LOC100506585
peak_20883	2.79781	-2.83436	12.3834	0.000433175	0.0225501	SYNDIG1
peak_22730	2.17569	-1.61354	12.373	0.000435596	0.0226418	ZC3H7B
peak_21987	2.40746	-2.49745	12.3687	0.000436592	0.0226463	TRPM2
peak_23996	2.10338	-2.10588	12.3669	0.000437004	0.0226463	FAM172BP
peak_14454	2.43906	-2.36829	12.3441	0.00044238	0.0228903	B4GALNT2
peak_22443	2.31386	-2.46205	12.3313	0.000445424	0.0230131	RNF185
peak_32641	2.17877	-1.83517	12.3166	0.000448936	0.0231597	MROH5
peak_29693	2.48899	-2.62826	12.31	0.000450546	0.023196	LOC105378146
peak_25198	-1.73003	-0.805863	12.3081	0.000450993	0.023196	MIR1255B1
peak_22033	2.13302	-1.26408	12.3023	0.000452408	0.023234	COL18A1
peak_5809	2.55627	-2.70376	12.293	0.000454671	0.0232958	VWCE
peak_2480	2.12661	-2.07528	12.291	0.000455157	0.0232958	LOC100505795
peak_5148	2.45306	-2.46481	12.2848	0.000456652	0.0232958	SCART1
peak_8861	2.66233	-2.68582	12.2837	0.00045694	0.0232958	KATNAL1
peak_13685	2.66233	-2.68582	12.2834	0.000457007	0.0232958	MPRIP
peak_23680	1.95558	-1.05002	12.2759	0.000458856	0.023325	HYAL1
peak_20941	1.92381	-1.86913	12.2739	0.000459333	0.023325	DEFB115
peak_29822	2.18438	-2.31596	12.2723	0.000459733	0.023325	SNORA114
peak_22478	2.10764	-2.15031	12.27	0.0004603	0.023325	TIMP3
peak_11768	1.75718	-1.48459	12.2616	0.000462375	0.0233587	HBM
peak_26583	2.208	-2.19216	12.2582	0.000463221	0.0233587	LINC02219
peak_10574	2.70441	-2.54835	12.2564	0.000463673	0.0233587	MIR8071-1
peak_28455	2.08609	-2.01764	12.2548	0.000464057	0.0233587	PPARD
peak_27840	-1.49936	-0.612537	12.251	0.000465006	0.0233587	SNRNP48
peak_23012	2.25798	-1.90677	12.2508	0.000465051	0.0233587	LOC105373100
peak_27101	2.11838	-2.28964	12.2117	0.000474899	0.0238185	MIR5692C1
peak_5781	1.97819	-2.01112	12.2003	0.000477818	0.02393	MIR6503
peak_14238	2.3404	-2.47314	12.1947	0.000479254	0.023931	CAVIN1
peak_23520	2.02987	-2.25378	12.1925	0.00047981	0.023931	LIMD1-AS1
peak_15183	1.79945	-1.41682	12.1921	0.000479932	0.023931	ACTG1
peak_27237	1.76357	-1.87511	12.1604	0.000488152	0.0242932	NDFIP1
peak_32285	2.75855	-2.81869	12.1586	0.000488611	0.0242932	MIR4471
peak_19285	2.41147	-2.60156	12.1435	0.000492595	0.0244211	IL1R1
peak_15390	1.88288	-1.70713	12.1434	0.000492608	0.0244211	ANKRD62
peak_33981	1.99006	-2.14413	12.1276	0.000496801	0.0245934	LINC02247
peak_34002	2.56198	-2.6539	12.1174	0.000499536	0.0246932	LOC401557
peak_18008	2.14382	-2.12402	12.1133	0.000500622	0.0247113	ZNF579
peak_24944	1.99859	-1.37631	12.107	0.000502341	0.0247605	TACC3
peak_31455	1.88542	-1.96937	12.0974	0.000504917	0.0248518	MIR595
peak_16088	2.78947	-2.40329	12.082	0.000509105	0.025022	SMIM24
peak_2083	2.64607	-2.68184	12.0737	0.000511385	0.0250733	ARNT
peak_30831	2.43123	-2.04761	12.0729	0.00051161	0.0250733	AGFG2
peak_11899	2.37499	-2.17703	12.0321	0.000522929	0.0255829	PDPK1
peak_24947	2.5058	-1.90046	12.03	0.0005235	0.0255829	LETM1
peak_27473	2.30059	-2.50929	12.0162	0.000527407	0.0257372	MAT2B
peak_2649	1.68588	-1.75836	12.0002	0.000531963	0.0259226	ABL2
peak_4000	2.89818	-2.86469	11.9812	0.000537402	0.0261183	FZD8
peak_20732	2.89818	-2.86469	11.9804	0.000537621	0.0261183	SLC23A2
peak_8639	2.00516	-1.86953	11.9782	0.000538262	0.0261183	PIWIL1
peak_9557	2.19969	-2.06783	11.967	0.000541504	0.0262385	OXA1L
peak_28834	2.05771	-1.92956	11.9638	0.000542444	0.0262469	SLC17A5
peak_12494	2.63272	-2.78259	11.9554	0.000544886	0.026328	LOC105369266
peak_11443	2.051	-2.31129	11.9497	0.00054657	0.0263722	RASGRF1
peak_12170	2.20413	-2.42089	11.9269	0.000553283	0.0266586	TMC5
peak_6180	2.06852	-0.815571	11.9232	0.00055438	0.026674	LINC01488
peak_26593	2.07079	-2.27065	11.9134	0.00055733	0.0267784	PIK3R1
peak_16058	2.73382	-2.71046	11.9004	0.000561217	0.0269274	ZNF77
peak_2284	1.82128	-1.98277	11.8926	0.000563576	0.0270028	SMG5
peak_4577	2.78885	-2.88737	11.8755	0.000568775	0.0271908	HECTD2
peak_4987	2.32757	-2.46942	11.8745	0.000569083	0.0271908	LHPP
peak_21797	1.85435	-2.04055	11.8314	0.000582404	0.02775	LINC01426
peak_18011	2.55094	-2.54932	11.8298	0.000582898	0.02775	FIZ1
peak_10576	2.26029	-2.25538	11.8288	0.000583213	0.02775	ELK2AP
peak_10335	2.57692	-2.54964	11.8219	0.000585369	0.027814	ITPK1-AS1
peak_6823	2.31209	-2.41416	11.8104	0.000588992	0.0279249	HYLS1
peak_34056	2.60159	-2.11049	11.8094	0.000589332	0.0279249	MIR6722
peak_18114	2.10348	-2.28441	11.7954	0.000593775	0.0280764	FAM110C
peak_16096	2.39352	-2.22602	11.7942	0.000594165	0.0280764	GIPC3
peak_32435	2.12918	-2.00036	11.7571	0.000606126	0.0285924	FAM83A
peak_26130	2.17828	-2.22467	11.7551	0.000606752	0.0285924	MIR4455
peak_4853	2.29642	-2.35679	11.7396	0.00061184	0.0287926	PDCD4-AS1
peak_22068	1.74701	-1.12954	11.7079	0.000622359	0.0292475	MCM3AP
peak_16850	2.52031	-2.69419	11.7051	0.00062329	0.0292512	COMP
peak_10630	1.38421	-0.632759	11.6734	0.000634012	0.0297137	TUBGCP5
peak_22612	1.72758	-1.12048	11.6667	0.000636277	0.0297791	PLA2G6
peak_18731	2.23955	-2.48659	11.661	0.000638253	0.0298216	ACYP2
peak_33516	2.00522	-2.24343	11.659	0.000638922	0.0298216	KLF4
peak_18006	2.0052	-2.24343	11.6554	0.000640148	0.0298382	SBK2
peak_29768	1.80928	-1.3398	11.6497	0.000642114	0.0298892	SUN1
peak_9246	-1.60176	-0.804914	11.6452	0.000643685	0.0299218	LINC00560
peak_12321	2.33166	-2.47114	11.6264	0.000650208	0.0301669	MIR6862-2
peak_13338	1.62801	-1.4841	11.625	0.000650718	0.0301669	METTL16
peak_9767	-2.18652	-1.5722	11.6059	0.000657447	0.0304377	FRMD6-AS2
peak_11730	1.81114	-1.97835	11.5987	0.000659991	0.0305143	CERS3
peak_31524	2.1123	-2.19803	11.5948	0.000661361	0.0305366	KBTBD11
peak_27393	-6.60874	-2.7158	11.5314	0.000684307	0.0315331	SGCD
peak_26340	1.96152	-2.22522	11.5301	0.000684783	0.0315331	GOLPH3
peak_1381	2.7804	-2.7225	11.514	0.000690748	0.0317652	DNAJC6
peak_31995	2.3211	-2.51642	11.5008	0.000695657	0.0319481	MOS
peak_14961	1.86626	-2.04727	11.4849	0.000701653	0.0321804	CDK3
peak_23997	1.88612	-1.46232	11.4408	0.000718502	0.0328678	TRMT10C
peak_10632	2.10218	-2.10767	11.4406	0.000718559	0.0328678	MAGEL2
peak_32565	-6.58478	-2.7423	11.4243	0.000724905	0.033114	CCN4
peak_13699	1.95243	-1.70925	11.4201	0.000726554	0.0331452	MED9
peak_8798	-1.15584	0.528005	11.404	0.000732844	0.0333877	TPTE2P6
peak_18021	1.84271	-0.956674	11.4015	0.000733859	0.0333896	EPN1
peak_34003	2.12942	-2.34351	11.3696	0.000746578	0.0339233	LOC401557
peak_5090	1.9958	-2.24001	11.329	0.000763076	0.0346271	PWWP2B
peak_24672	1.76006	-1.79419	11.3225	0.000765738	0.0346925	ECE2
peak_26590	2.64959	-2.79345	11.3206	0.000766539	0.0346925	PIK3R1
peak_115	1.34808	0.673293	11.3148	0.000768926	0.0347546	MMEL1
peak_23991	1.80404	-2.11137	11.3115	0.000770305	0.0347711	TFG
peak_10714	2.25732	-2.34865	11.3028	0.000773919	0.0348884	FMN1
peak_26152	2.11627	-2.43923	11.2887	0.000779813	0.035108	LINC02508
peak_29808	1.8549	-1.13916	11.2738	0.000786076	0.0353045	MIR4655
peak_11191	2.00996	-1.91064	11.2734	0.000786238	0.0353045	LOC102723493
peak_15289	2.07976	-1.39056	11.2692	0.000788026	0.0353386	RPL23AP87
peak_11294	2.19983	-2.52483	11.2659	0.000789419	0.0353548	MIR12135
peak_25388	1.91155	-2.20383	11.2634	0.0007905	0.0353571	MIR548AG1
peak_32659	2.10302	-2.15187	11.2453	0.000798256	0.0356575	CDC42P3
peak_33737	2.0127	-2.29563	11.2391	0.000800921	0.0357301	SH2D3C
peak_9279	2.37682	-2.59217	11.2282	0.000805658	0.0358724	MIR3170
peak_26734	1.52963	-1.53625	11.2269	0.000806203	0.0358724	EDIL3
peak_15158	1.64629	-1.49469	11.1939	0.000820683	0.0364693	LOC400627
peak_5639	1.68598	-1.27909	11.1909	0.000821993	0.0364803	PRDM11
peak_33399	1.77081	-1.91873	11.142	0.00084397	0.0374073	GAS2L1P2
peak_508	2.55549	-2.76319	11.1234	0.000852468	0.0377057	HSPG2
peak_10868	2.55548	-2.76319	11.1224	0.0008529	0.0377057	CCNDBP1
peak_25164	-1.27316	-0.310793	11.0962	0.000865049	0.0381935	TBC1D19
peak_20994	1.70796	-1.29096	11.0932	0.000866438	0.0382057	NOL4L
peak_17403	2.26813	-2.50009	11.0565	0.000883777	0.0389202	CD177
peak_495	2.06732	-2.2255	11.0338	0.00089464	0.0393481	ECE1
peak_27694	2.29057	-2.6136	11.0239	0.000899427	0.039508	RNF130
peak_22840	2.00856	-2.06848	11.0083	0.000907043	0.0397916	PARVG
peak_11567	2.36667	-2.48823	11.0009	0.000910664	0.0398994	KIF7
peak_14709	-1.44123	-0.581633	10.9971	0.000912562	0.0399316	ICAM2
peak_13150	2.12722	-2.16422	10.9811	0.000920446	0.0402252	ACSF3
peak_15320	1.73989	-1.78569	10.9767	0.000922663	0.0402708	LPIN2
peak_23701	1.71706	-1.59657	10.9549	0.000933571	0.0406952	MIR4787
peak_9424	2.27216	-1.30588	10.9386	0.000941821	0.0409773	F7
peak_5267	1.99793	-2.24177	10.9374	0.000942433	0.0409773	KCNQ1
peak_8521	2.29117	-2.15077	10.9224	0.000950091	0.041258	SETD1B
peak_4371	1.72763	-1.74232	10.8837	0.000970167	0.0420765	GLUD1P3
peak_5218	2.33095	-1.98013	10.8731	0.000975706	0.0422634	MUC6
peak_8479	1.71998	-1.19342	10.8574	0.000984	0.0425428	OASL
peak_31709	1.99859	-2.2904	10.8562	0.000984638	0.0425428	SLC25A37
peak_26158	1.84836	-1.62942	10.8331	0.000996995	0.0430225	PLEKHG4B
peak_3048	1.56171	-1.66057	10.8198	0.00100421	0.043226	IRF6
peak_31153	2.30046	-2.51133	10.8191	0.00100459	0.043226	TRIM24
peak_4074	1.78141	-1.35613	10.8174	0.00100549	0.043226	AGAP4
peak_16079	1.78629	-1.92609	10.7917	0.00101959	0.0437771	NCLN
peak_15235	1.8783	-1.67686	10.7782	0.00102704	0.0440421	SECTM1
peak_17647	1.73744	-1.30669	10.7567	0.00103902	0.0445001	EHD2
peak_16889	1.27978	-1.04515	10.748	0.00104391	0.0446539	CILP2
peak_11977	1.71636	-1.70079	10.7346	0.00105148	0.0449217	PAM16
peak_4615	2.53802	-2.75914	10.7187	0.0010606	0.0452547	SORBS1
peak_11076	2.11755	-2.39047	10.7004	0.00107115	0.0456338	RORA-AS2
peak_13844	1.87065	-2.09401	10.6965	0.00107336	0.0456338	FOXN1
peak_5222	2.46531	-2.47807	10.6963	0.00107347	0.0456338	MUC5AC
peak_15290	1.64407	-1.70444	10.6861	0.00107946	0.0458317	RPL23AP87
peak_32724	1.91609	-1.26389	10.677	0.00108477	0.0459671	MIR7112
peak_5022	1.86023	-1.9213	10.676	0.00108533	0.0459671	FOXI2
peak_16994	2.62855	-2.78936	10.6735	0.00108684	0.0459741	URI1
peak_21308	2.40845	-2.45565	10.6575	0.00109628	0.0463087	ARFGEF2
peak_15845	2.21245	-2.28883	10.6555	0.00109745	0.0463087	CTDP1
peak_21995	1.91425	-1.59904	10.649	0.00110129	0.046414	TSPEAR
peak_8376	3.61589	-3.0927	10.6461	0.00110301	0.0464293	RPH3A
peak_6537	1.78253	-1.92483	10.6319	0.00111156	0.0467254	RAB39A
peak_23934	1.67334	-0.95926	10.6298	0.00111277	0.0467254	LINC02008
peak_29866	2.14604	-2.50401	10.6199	0.00111875	0.0469172	GNA12
peak_6191	1.63908	-0.919159	10.6178	0.00112007	0.0469172	MIR548K
peak_27954	2.33208	-2.63096	10.6139	0.00112241	0.0469227	JARID2
peak_12154	1.80477	-2.10971	10.6114	0.00112393	0.0469227	LOC100288162
peak_13414	1.98642	-2.06132	10.6101	0.00112474	0.0469227	ZMYND15
peak_6610	1.96496	-2.32628	10.6085	0.00112567	0.0469227	NNMT
peak_21956	2.06332	-2.36809	10.6024	0.00112939	0.0469775	RRP1
peak_23260	-0.902276	0.697298	10.6001	0.00113079	0.0469775	SATB1-AS1
peak_529	2.03509	-2.40732	10.5996	0.0011311	0.0469775	TCEA3
peak_21420	2.35626	-2.39176	10.5877	0.00113842	0.0472245	FAM210B
peak_22606	2.09194	-2.28268	10.5838	0.00114084	0.0472504	SLC16A8
peak_34268	1.82142	-2.11771	10.5822	0.0011418	0.0472504
peak_21141	2.35616	-2.39176	10.5793	0.00114363	0.0472693	VSTM2L
peak_22549	-1.10628	0.575364	10.5703	0.00114921	0.0474426	IL2RB
peak_5316	2.26029	-2.60424	10.5529	0.00116003	0.0477875	OR52B4
peak_34158	-2.28498	-0.480403	10.5524	0.00116035	0.0477875
peak_4967	2.25331	-2.21698	10.5472	0.00116363	0.0478651	BUB3
peak_23152	2.81273	-2.90196	10.5365	0.00117039	0.0480857	IQSEC1
peak_34128	2.50855	-2.80603	10.5273	0.00117625	0.048247	LOC105376331
peak_28565	2.4683	-2.48009	10.5259	0.00117713	0.048247	LRFN2
peak_25332	2.25437	-2.60256	10.5194	0.00118127	0.0483588	USP46
peak_9597	2.27387	-2.60424	10.513	0.00118538	0.048469	CPNE6
peak_21059	2.36982	-2.70088	10.505	0.0011905	0.0485922	EDEM2
peak_13881	2.02521	-2.40252	10.5039	0.00119122	0.0485922	MYO18A
peak_9985	2.67888	-2.91902	10.4983	0.00119486	0.0486429	LOC100996664
peak_28419	2.07236	-2.37155	10.4976	0.0011953	0.0486429	GRM4
peak_32833	2.27462	-2.40514	10.4926	0.00119855	0.0487173	KDM4C
peak_2191	2.04434	-2.17342	10.4839	0.00120419	0.0488541	ADAR
peak_21653	2.88628	-2.75283	10.483	0.00120476	0.0488541	MIR3156-3
peak_29688	2.27773	-2.13561	10.4807	0.0012063	0.0488587	KIF25-AS1
peak_123	2.24289	-2.25193	10.4708	0.00121274	0.0490616	TTC34
peak_29364	-1.03987	0.074836	10.4574	0.0012216	0.0493618	TXLNB
peak_34103	2.25227	-2.49634	10.4512	0.00122572	0.04947	EXD3
peak_22065	1.76747	-2.14023	10.4415	0.00123218	0.0496386	LSS
peak_16996	1.94063	-2.26623	10.4405	0.00123279	0.0496386	TSHZ3
peak_17940	1.72333	-1.50516	10.4347	0.00123671	0.049738	LILRA6
peak_31076	1.99342	-2.39011	10.4171	0.00124855	0.05013	UBE2H
peak_14399	2.17352	-1.77573	10.4159	0.00124938	0.05013	EFCAB13
peak_22810	1.5027	-1.05515	10.4088	0.00125414	0.0502623	TTLL1
peak_29889	2.2183	-2.53515	10.4012	0.00125936	0.0503708	LOC105375131
peak_20717	1.82001	-2.02745	10.4005	0.00125979	0.0503708	SMOX
peak_24903	2.15639	-2.26619	10.3955	0.00126324	0.0504503	GAK
peak_1120	2.38613	-2.54858	10.3811	0.00127315	0.0507868	MPL
peak_26610	2.12648	-2.08496	10.3649	0.00128431	0.0511217	MCCC2
peak_29720	2.16005	-2.40964	10.3646	0.00128452	0.0511217	LOC100131532
peak_10761	2.57317	-2.20816	10.3617	0.00128655	0.0511428	GPR176
peak_29966	2.03553	-2.30796	10.3469	0.00129695	0.0514968	ZNF316
peak_12928	1.82179	-1.46206	10.3447	0.00129846	0.051497	DYNLRB2
peak_6912	1.33562	-0.841799	10.3416	0.00130068	0.0515256	OPCML
peak_9376	1.64013	-1.90017	10.3222	0.00131443	0.0520102	COL4A2-AS1
peak_22041	1.45208	-1.46454	10.3043	0.00132722	0.0524557	SLC19A1
peak_17264	1.65497	-1.9495	10.284	0.00134186	0.0529735	CNTD2
peak_23554	1.79418	-1.93147	10.273	0.00134993	0.0532306	LRRC2
peak_20603	1.68233	-1.9192	10.2668	0.00135444	0.053344	LINC01238
peak_17737	2.19702	-2.23962	10.2648	0.00135591	0.053344	TRPM4
peak_9938	1.4553	-1.33442	10.247	0.00136904	0.0537986	SPTB
peak_13299	1.91353	-2.16029	10.2358	0.00137738	0.0540647	WDR81
peak_15139	2.30427	-2.6767	10.2251	0.00138541	0.0542869	RNF213
peak_31497	2.15558	-2.30894	10.2241	0.00138621	0.0542869	TDRP
peak_5073	2.85065	-3.03371	10.2107	0.00139631	0.05462	BNIP3
peak_12497	1.62614	0.947225	10.2082	0.00139817	0.0546304	LOC105369266
peak_31457	2.2343	-2.25664	10.1945	0.00140862	0.0549764	MIR595
peak_1700	2.45691	-2.73131	10.1785	0.00142091	0.0553928	WDR47
peak_19408	-1.09037	-0.0389334	10.175	0.00142359	0.0554345	PSD4
peak_16176	2.03867	-2.40903	10.1655	0.00143091	0.055656	PLIN3
peak_28262	-1.13007	0.0258711	10.156	0.00143831	0.0558809	HLA-C
peak_13681	2.24673	-2.398	10.1423	0.00144906	0.0562347	LINC02090
peak_22312	-1.02741	0.358122	10.1389	0.00145169	0.0562731	DDT
peak_9422	1.84652	-1.99863	10.1266	0.00146147	0.0565884	MCF2L
peak_29773	2.03821	-2.40921	10.1173	0.00146883	0.056809	SUN1
peak_15785	1.66544	-1.35703	10.1102	0.00147452	0.0569648	LINC00683
peak_371	1.6918	-1.55418	10.0981	0.00148422	0.0572751	PLEKHM2
peak_21024	1.92915	-2.08007	10.0899	0.00149082	0.0574652	E2F1
peak_26724	1.58927	-1.07844	10.0769	0.00150136	0.0578065	ATG10
peak_15886	2.12832	-2.34946	10.0659	0.00151041	0.05809	PLPPR3
peak_2327	2.54648	-2.55356	10.0603	0.00151499	0.0582009	ETV3
peak_17780	1.88309	-1.82213	10.0329	0.00153766	0.0590057	MIR6799
peak_11489	2.11978	-2.44455	10.0288	0.00154112	0.0590236	RAMAC
peak_4213	-6.57595	-2.67657	10.0283	0.00154157	0.0590236	EGR2
peak_21551	2.23726	-2.17431	10.0228	0.00154612	0.0591318	HAR1B
peak_6578	1.72843	-1.74582	10.0135	0.00155399	0.0593665	DLAT
peak_10825	1.99776	-1.8384	10.0107	0.00155637	0.0593913	OIP5
peak_3286	2.52277	-2.50272	10.006	0.00156029	0.0594746	RNA5S13
peak_13836	2.3348	-2.58276	9.99578	0.00156899	0.0597402	LINC01992
peak_33273	-1.00492	0.00754415	9.98261	0.00158026	0.0601023
peak_17506	1.65204	-1.56687	9.97166	0.00158968	0.0603937	KLC3
peak_14159	1.36715	-1.05757	9.96021	0.0015996	0.0607033	MSL1
peak_12894	1.8165	-1.79003	9.95169	0.00160702	0.0609175	LOC100506281
peak_34102	2.13299	-2.35121	9.94819	0.00161008	0.0609192	EXD3
peak_197	2.51675	-2.7551	9.94388	0.00161385	0.0609192	PARK7
peak_13191	1.88805	-2.24415	9.94366	0.00161404	0.0609192	SPATA33
peak_8886	2.34668	-2.69527	9.94352	0.00161416	0.0609192	LINC00398
peak_15843	1.97792	-1.83179	9.92114	0.00163391	0.0615798	CTDP1
peak_27196	1.91392	-2.20812	9.91962	0.00163526	0.0615798	ANKHD1
peak_940	1.55422	-0.449439	9.91299	0.00164117	0.0617345	ADPRHL2
peak_25612	2.07179	-2.53119	9.90671	0.00164678	0.0618776	SNCA-AS1
peak_5325	2.58317	-2.83305	9.89413	0.00165807	0.0622338	HBG2
peak_17713	1.4381	-1.35653	9.8896	0.00166215	0.062319	HSD17B14
peak_21467	2.72873	-2.94124	9.86683	0.00168286	0.0630263	GNAS
peak_3032	2.44811	-2.67894	9.84502	0.00170293	0.0636819	PLXNA2
peak_24545	1.64456	-1.81886	9.84299	0.0017048	0.0636819	LOC105374194
peak_11913	1.84659	-1.80563	9.84177	0.00170593	0.0636819	PRSS22
peak_13903	-2.08172	-1.4155	9.83123	0.00171574	0.0639784	SSH2
peak_33259	1.89516	-2.24758	9.81474	0.00173118	0.0644843	S1PR3
peak_34185	-1.4084	-0.686062	9.78628	0.00175819	0.0653564	LOC100507412
peak_20583	1.1493	-0.840842	9.78605	0.00175841	0.0653564	BOK-AS1
peak_20258	2.3132	-2.62761	9.77393	0.00177004	0.0657116	SPEG
peak_10465	2.35909	-2.69923	9.7721	0.0017718	0.0657116	DYNC1H1
peak_6173	1.97362	-2.43646	9.74039	0.00180263	0.0667829	MIR3164
peak_17924	2.13323	-2.26093	9.73183	0.00181104	0.0669674	CACNG6
peak_30519	2.13322	-2.26093	9.73135	0.00181151	0.0669674	GALNT17
peak_6854	-0.920849	0.583935	9.72873	0.0018141	0.0669697	LINC02098
peak_8690	1.41307	-1.37847	9.72733	0.00181548	0.0669697	PXMP2
peak_10502	2.16037	-2.56879	9.72064	0.0018221	0.0670505	MARK3
peak_30721	1.73622	-2.17628	9.71955	0.00182318	0.0670505	RBM48
peak_12425	1.83527	-2.22077	9.71745	0.00182526	0.0670505	ZNF764
peak_31538	-2.21229	-1.54335	9.71723	0.00182549	0.0670505	MIR7160
peak_6876	-3.44698	-2.45415	9.71051	0.00183217	0.0671651	SENCR
peak_21588	2.22584	-2.59486	9.71016	0.00183252	0.0671651	ZBTB46-AS1
peak_33952	2.23131	-2.59702	9.70339	0.00183928	0.0672666	SURF4
peak_14872	1.6962	-1.8061	9.7018	0.00184088	0.0672666	BTBD17
peak_6957	2.047	-2.1367	9.70009	0.00184259	0.0672666	FBXL14
peak_15199	2.15405	-2.2229	9.69955	0.00184313	0.0672666	MCRIP1
peak_13256	2.33606	-2.30047	9.6945	0.00184821	0.067304	MIR3183
peak_29752	1.97943	-1.79286	9.69235	0.00185037	0.067304	PDGFA
peak_13251	1.42182	-1.41437	9.69111	0.00185162	0.067304	NXN
peak_20067	2.1297	-2.50272	9.69	0.00185274	0.067304	CFLAR-AS1
peak_553	-1.01177	0.370582	9.68878	0.00185397	0.067304	PNRC2
peak_13838	2.13325	-2.16958	9.68026	0.00186258	0.0675453	PYY2
peak_16594	2.25756	-2.66327	9.67624	0.00186666	0.0675967	PRKACA
peak_13655	2.07116	-2.47837	9.67498	0.00186794	0.0675967	SNORD163
peak_2342	-2.49667	-1.9466	9.66625	0.00187684	0.0677459	IFI16
peak_16730	2.40049	-2.60931	9.66431	0.00187882	0.0677459	F2RL3
peak_31431	2.00311	-2.39665	9.66079	0.00188242	0.0677459	MIR153-2
peak_28389	-1.38163	-0.710589	9.65998	0.00188325	0.0677459	SMIM40
peak_13238	1.83147	-2.17097	9.65921	0.00188405	0.0677459	VPS53
peak_15270	1.70065	-0.277642	9.65782	0.00188547	0.0677459	B3GNTL1
peak_33206	1.76158	-2.09141	9.65741	0.00188589	0.0677459	IDNK
peak_33849	1.64147	-1.70292	9.65088	0.00189261	0.0679126	MIR6855
peak_26253	2.48166	-0.806158	9.64906	0.00189449	0.0679126	ADCY2
peak_28625	2.76191	-2.89453	9.6372	0.00190676	0.068281	PRPH2
peak_32634	2.06387	-2.32409	9.63219	0.00191196	0.0683959	GPR20
peak_17020	2.60202	-2.78527	9.62755	0.00191681	0.0684979	CEBPG
peak_532	1.51486	-1.0397	9.61801	0.00192678	0.0687289	LOC101928163
peak_9912	1.68377	-1.42731	9.61754	0.00192728	0.0687289	SGPP1
peak_28762	-0.973981	0.14515	9.61024	0.00193495	0.0689308	RPS16P5
peak_9955	1.90956	-2.35565	9.60609	0.00193933	0.0689475	GPHN
peak_22981	1.66399	-1.44703	9.60599	0.00193944	0.0689475	SELENOO
peak_5076	2.73664	-2.94283	9.60078	0.00194494	0.0690717	JAKMIP3
peak_26481	2.01274	-2.40011	9.59398	0.00195216	0.0692563	ITGA2
peak_13030	2.10334	-2.38874	9.58427	0.00196251	0.0695516	GSE1
peak_21960	2.287	-2.51563	9.57848	0.00196871	0.0696994	AGPAT3
peak_15972	1.7435	-1.86883	9.57016	0.00197765	0.0699437	KLF16
peak_33031	2.43294	-2.51641	9.5486	0.00200102	0.0706973	TPM2
peak_29524	1.63254	-1.73598	9.54214	0.00200807	0.0708574	ARID1B
peak_12557	-2.00999	-0.924187	9.54067	0.00200968	0.0708574	BRD7
peak_27615	1.41462	-1.58856	9.53786	0.00201277	0.0708932	MXD3
peak_26574	1.36796	-1.45902	9.53031	0.00202106	0.0711125	MAST4
peak_7574	2.01379	-2.45451	9.52734	0.00202433	0.0711545	POU6F1
peak_6138	2.01377	-2.45451	9.52483	0.00202711	0.0711783	FAM86C2P
peak_8396	2.40076	-1.27876	9.52297	0.00202916	0.0711783	RBM19
peak_4957	2.05105	-2.22384	9.49709	0.00205798	0.0721155	TACC2
peak_16653	2.33707	-2.69296	9.47267	0.00208555	0.0730071	NOTCH3
peak_12875	1.73373	-2.07849	9.46101	0.00209885	0.0733978	CLEC18B
peak_16459	2.11254	-2.07741	9.45844	0.0021018	0.0734259	CCDC151
peak_29468	1.78781	-2.19954	9.4507	0.00211069	0.0736616	IYD
peak_6672	2.54408	-2.82568	9.44716	0.00211476	0.0737288	CD3D
peak_26384	1.83747	-2.17431	9.43152	0.00213287	0.0742458	WDR70
peak_13248	2.3366	-2.58446	9.43062	0.00213392	0.0742458	MRM3
peak_2093	-0.939019	0.181162	9.42129	0.00214481	0.0745489	CDC42SE1
peak_8352	1.88916	-1.86397	9.41193	0.00215579	0.0748547	SH2B3
peak_8935	-1.06811	-0.0283679	9.40145	0.00216814	0.0751769	LINC00598
peak_5116	2.2137	-2.20683	9.40034	0.00216945	0.0751769	NKX6-2
peak_29772	2.25008	-2.55296	9.39359	0.00217745	0.0753781	SUN1
peak_4415	2.41671	-2.61542	9.38151	0.00219184	0.0757998	LRMDA
peak_17563	2.57259	-2.9542	9.37629	0.0021981	0.0758086	HIF3A
peak_5196	2.07463	-2.48008	9.37405	0.00220079	0.0758086	IRF7
peak_20411	2.07462	-2.48008	9.37358	0.00220135	0.0758086	NGEF
peak_21350	-1.07686	0.221784	9.37161	0.00220372	0.0758086	LINC01271
peak_6898	2.009	-1.99909	9.37052	0.00220503	0.0758086	ST14
peak_24934	2.57656	-2.51547	9.36928	0.00220652	0.0758086	NKX1-1
peak_8709	2.53038	-2.70921	9.36841	0.00220757	0.0758086	ANHX
peak_23287	2.17339	-2.63199	9.36654	0.00220982	0.0758102	RPL15
peak_33154	1.7783	-2.01084	9.35856	0.00221947	0.0760466	LOC101927358
peak_25063	2.9615	-3.01182	9.35717	0.00222115	0.0760466	PSAPL1
peak_4062	1.57057	-1.86532	9.35393	0.00222508	0.0761053	ALOX5
peak_20605	1.95915	-1.69216	9.34934	0.00223066	0.0761671	LINC01880
peak_17692	1.77501	-1.80966	9.34879	0.00223133	0.0761671	SULT2B1
peak_13919	1.30455	-0.0327151	9.33892	0.00224337	0.0765021	GOSR1
peak_30978	1.62817	-1.42997	9.33143	0.00225256	0.0767392	IMMP2L
peak_171	1.39655	-1.61676	9.32699	0.00225803	0.076849	TNFRSF25
peak_17824	1.84718	-2.32879	9.32403	0.00226168	0.0768971	ACP4
peak_26611	2.25502	-2.35215	9.30982	0.00227929	0.0774192	MCCC2
peak_5079	1.66356	-2.09232	9.29363	0.00229952	0.0780291	DPYSL4
peak_21117	1.66171	-1.53895	9.2852	0.00231013	0.0783094	SAMHD1
peak_9341	-0.910986	0.196095	9.28344	0.00231235	0.0783094	TPP2
peak_31942	-3.04005	-1.98129	9.276	0.00232176	0.0785507	SPIDR
peak_23481	-1.48675	-0.805047	9.2622	0.00233932	0.0790459	SNRK-AS1
peak_13182	2.35715	-1.90021	9.26088	0.00234101	0.0790459	CPNE7
peak_12587	1.68164	-1.13002	9.256	0.00234726	0.0791789	RPGRIP1L
peak_22942	2.18156	-1.82739	9.25381	0.00235006	0.0791957	MIR4535
peak_13964	1.71134	-1.77791	9.24963	0.00235543	0.0792988	ARGFXP2
peak_10525	1.62608	-1.55706	9.21906	0.00239509	0.0805547	KIF26A
peak_27493	3.03517	-3.0249	9.21645	0.0023985	0.0805905	MIR218-2
peak_7393	2.43727	-2.79052	9.20099	0.00241884	0.0811763	ALG10B
peak_15822	2.43726	-2.79052	9.19941	0.00242093	0.0811763	SALL3
peak_33415	2.60089	-2.73684	9.19691	0.00242424	0.0811763	HEMGN
peak_17279	1.94006	-2.31929	9.1946	0.00242731	0.0811763	SPTBN4
peak_4402	-1.88963	-1.58896	9.19313	0.00242924	0.0811763	SNORD172
peak_8267	-0.899514	0.716062	9.19247	0.00243013	0.0811763	SELPLG
peak_29888	1.51411	-0.583886	9.18703	0.00243736	0.0813386	SDK1
peak_29700	1.72846	-2.03158	9.18092	0.00244551	0.0815212	LOC101929460
peak_212	2.00186	-2.45083	9.17937	0.00244758	0.0815212	SNORD128
peak_33719	2.42423	-2.84249	9.17324	0.00245579	0.0816513	ANGPTL2
peak_3471	2.42423	-2.84249	9.1729	0.00245625	0.0816513	KIF26B-AS1
peak_11116	1.56664	-1.86353	9.16344	0.00246898	0.0819949	SNX22
peak_20931	1.73514	-1.64733	9.15875	0.00247531	0.0821257	MLLT10P1
peak_6210	2.5218	-2.46442	9.15176	0.00248479	0.0823606	KRTAP5-11
peak_10159	1.88384	-2.15184	9.14057	0.00250003	0.0827858	LINC01629
peak_5911	2.77963	-2.89774	9.13822	0.00250324	0.0828123	MACROD1
peak_5012	1.20427	-0.723581	9.1178	0.00253134	0.0836155	FANK1
peak_12253	1.88156	-2.3451	9.11704	0.0025324	0.0836155	RBBP6
peak_31309	1.83081	-2.27042	9.11473	0.00253559	0.0836403	LOC100134040
peak_34111	-0.835144	0.739964	9.10546	0.00254847	0.0839845	NSMF
peak_2799	-1.73171	-0.480683	9.09153	0.00256796	0.0844742	MIR181B1
peak_24824	1.67001	-1.95897	9.09132	0.00256826	0.0844742	MUC20
peak_16186	1.78314	-2.24838	9.0849	0.00257728	0.084645	PTPRS
peak_28885	1.60475	-1.41841	9.08382	0.00257881	0.084645	CEP162
peak_27014	2.03157	-2.41223	9.07979	0.00258449	0.084645	ACSL6
peak_13163	1.50032	-0.33051	9.07905	0.00258554	0.084645	LOC105371414
peak_16020	1.05571	-0.31499	9.07809	0.0025869	0.084645	LMNB2
peak_3741	1.77982	-1.28358	9.07562	0.0025904	0.084645	MIR4480
peak_31452	2.01527	-1.01121	9.07428	0.0025923	0.084645	LOC100506585
peak_16092	2.06124	-1.98084	9.07365	0.00259319	0.084645	C19orf71
peak_26195	2.35737	-2.35568	9.04897	0.00262843	0.0857139	TERT
peak_13237	2.5766	-2.52789	9.03835	0.00264374	0.0861313	VPS53
peak_16418	1.95942	-2.33018	9.033	0.00265149	0.0863018	SLC44A2
peak_15110	1.86435	-2.01239	9.03076	0.00265474	0.0863255	CANT1
peak_19802	2.41604	-2.83998	9.02318	0.00266578	0.0866024	SLC25A12
peak_23800	2.55704	-2.77788	9.01747	0.00267411	0.0867909	SLMAP
peak_2977	1.76427	-2.23918	9.01314	0.00268045	0.0869145	MIR6769B
peak_16301	2.17747	-2.63366	9.00705	0.0026894	0.0871222	TIMM44
peak_11884	1.69917	-1.88934	9.00223	0.0026965	0.0872699	ABCA17P
peak_15768	1.49276	-1.708	8.99827	0.00270236	0.0873064	TIMM21
peak_6599	-1.57354	-0.731703	8.99803	0.00270272	0.0873064	ZBTB16
peak_21391	2.25999	-2.78246	8.99435	0.00270815	0.0873996	TSHZ2
peak_34013	1.47661	-1.54608	8.97093	0.00274309	0.0884439	UBAC1
peak_28896	2.35629	-1.49533	8.96661	0.00274958	0.0885701	HTR1E
peak_16805	1.46782	-1.54223	8.94661	0.00277984	0.0894573	IFI30
peak_33870	2.23203	-2.65767	8.94438	0.00278325	0.0894573	AIF1L
peak_19535	1.91841	-2.12403	8.942	0.00278688	0.0894573	LINC01087
peak_15321	1.46673	-1.77227	8.94155	0.00278755	0.0894573	LPIN2
peak_21336	-1.21775	-0.54784	8.93651	0.00279526	0.0896207	UBE2V1
peak_30780	1.91515	-2.0786	8.93289	0.0028008	0.0896425	PTCD1
peak_18171	2.32083	-2.8072	8.93266	0.00280116	0.0896425	NRIR
peak_2626	-1.78228	-1.47884	8.92776	0.00280869	0.0897995	TNR
peak_33565	-1.18261	-0.32906	8.92279	0.00281634	0.0899508	RGS3
peak_26186	2.10227	-2.12577	8.92128	0.00281866	0.0899508	MIR4635
peak_29484	2.52345	-2.93181	8.91904	0.00282213	0.0899777	ESR1
peak_20172	-6.48705	-2.88287	8.88859	0.00286958	0.0914055	SPAG16
peak_15848	2.49188	-2.54419	8.88563	0.00287424	0.091469	KCNG2
peak_27385	1.12066	-0.792822	8.86863	0.00290112	0.0922162	LARP1
peak_3561	1.62214	-1.2545	8.86739	0.00290309	0.0922162	LINC00200
peak_33210	1.68567	-2.10406	8.85734	0.00291913	0.0926398	GKAP1
peak_25172	-0.996514	0.0361262	8.84793	0.00293422	0.0930326	STIM2
peak_25554	-1.00816	0.269411	8.84297	0.00294219	0.0931993	COQ2
peak_34179	-0.946064	1.53003	8.83813	0.00295001	0.0933607	LOC283788
peak_29845	1.8656	-2.10055	8.83473	0.00295551	0.0934486	LFNG
peak_29856	2.27132	-2.32645	8.83261	0.00295895	0.0934712	IQCE
peak_20636	0.89669	-0.0299277	8.82909	0.00296466	0.0935653	RAD21L1
peak_7778	1.91719	-1.54271	8.82641	0.00296903	0.0936171	ATP5F1B
peak_1769	-0.853645	0.616172	8.82373	0.00297338	0.0936684	CHI3L2
peak_20543	1.86108	-2.05544	8.81794	0.00298282	0.0938796	COPS9
peak_9158	1.71858	-2.12028	8.81585	0.00298626	0.0939015	LINC00364
peak_5249	1.7594	-2.14033	8.81363	0.00298989	0.0939297	TNNT3
peak_13869	2.05529	-2.36993	8.81067	0.00299474	0.0939959	MIR4732
peak_24900	2.33512	-2.81128	8.80716	0.00300052	0.0940911	PCGF3
peak_34174	1.3143	-1.3904	8.79026	0.00302844	0.0948357
peak_4538	-1.26493	-0.579753	8.78944	0.00302979	0.0948357	PTEN
peak_4147	1.87802	-1.98142	8.78629	0.00303503	0.0949131	MIR605
peak_1109	1.55366	-1.94566	8.78341	0.00303982	0.0949764	SLC2A1
peak_28531	2.15043	-2.62642	8.77981	0.00304583	0.0950192	CCDC167
peak_9423	1.67486	-1.96287	8.77927	0.00304673	0.0950192	MCF2L
peak_14981	1.8597	-2.09876	8.76458	0.00307137	0.0957005	QRICH2
peak_23596	-0.873354	0.4108	8.76068	0.00307794	0.0958184	ZNF589
peak_23247	1.94249	-2.2747	8.75289	0.00309111	0.0960698	MIR3714
peak_19435	1.52044	-1.60642	8.75206	0.00309253	0.0960698	STEAP3
peak_23557	1.75	-1.69263	8.75094	0.00309442	0.0960698	TMIE
peak_10282	1.35059	-1.47887	8.74095	0.00311142	0.0965103	GPR68
peak_16244	1.79727	-1.90187	8.7376	0.00311715	0.0966007	TRIP10
peak_20199	1.94939	-2.4847	8.73424	0.00312289	0.0966913	SNORA115
peak_31653	1.7694	-2.2432	8.72672	0.0031358	0.0970035	NPM2
peak_21556	2.26462	-1.99991	8.72201	0.00314392	0.0970458	CHRNA4
peak_3061	1.85595	-2.28418	8.72189	0.00314412	0.0970458	RD3
peak_2261	1.07296	-0.559889	8.721	0.00314566	0.0970458	ARHGEF2
peak_6208	1.89607	-2.07321	8.71637	0.00315365	0.0972051	KRTAP5-7
peak_16188	1.97857	-2.55346	8.71298	0.00315952	0.0972985	ZNRF4
peak_30424	2.26322	-2.51184	8.71062	0.00316362	0.0973373	LANCL2
peak_3549	-6.69379	-2.6648	8.70559	0.00317236	0.0975188	IDI2-AS1
peak_16384	2.01293	-2.45647	8.6984	0.00318489	0.0978164	ICAM5
peak_33096	2.18537	-2.698	8.68758	0.00320385	0.0982627	ZNF658B
peak_182	1.88648	-2.15008	8.68536	0.00320777	0.0982627	LINC01672
peak_20540	2.58122	-2.90161	8.6843	0.00320964	0.0982627	NDUFA10
peak_4729	1.16462	-0.797541	8.68359	0.00321088	0.0982627	POLL
peak_6969	1.33794	-1.58535	8.67883	0.00321928	0.0984199	CACNA2D4
peak_17466	-0.932682	0.455468	8.67604	0.0032242	0.0984199	CBLC
peak_8488	-0.995319	0.120839	8.6758	0.00322463	0.0984199	P2RX4
peak_10500	1.85161	-2.05221	8.67237	0.0032307	0.0985177	EIF5
peak_17600	1.8761	-2.19778	8.66667	0.00324082	0.0987387	NPAS1
peak_382	-1.08398	-0.103933	8.66359	0.00324632	0.0988183	ZBTB17
peak_29805	2.03624	-2.46923	8.66131	0.00325038	0.0988541	ELFN1
peak_27970	2.03621	-2.46923	8.65832	0.00325571	0.0989287	GMPR
peak_1790	1.9879	-2.44715	8.64728	0.00327549	0.0993672	LINC01750
peak_1106	0.78858	0.633994	8.64704	0.00327594	0.0993672	SLC2A1
peak_24836	2.08472	-2.59971	8.63596	0.00329591	0.0998847	TFRC
peak_29686	2.19125	-2.1673	8.62628	0.00331348	0.100328	HGC6.3
peak_34186	1.54745	-0.87662	8.62379	0.00331801	0.100377	LOC100507412
peak_7809	1.54719	-1.51735	8.62043	0.00332413	0.100474	ARHGAP9
peak_30851	1.76603	-2.34707	8.60565	0.00335121	0.101203	MIR6875
peak_12131	1.83436	-2.37849	8.60002	0.00336159	0.101427	ABCC6
peak_442	1.92924	-1.9296	8.59322	0.00337417	0.101717	ARHGEF10L
peak_22944	1.94913	-2.32843	8.58059	0.00339765	0.102335	MIR3667
peak_1728	-7.17918	-2.37592	8.57612	0.003406	0.102497	GSTM1
peak_17261	2.31594	-2.68899	8.57176	0.00341417	0.102566	TTC9B
peak_2326	1.9964	-2.35027	8.57171	0.00341427	0.102566	ETV3
peak_488	1.76307	-1.35745	8.56965	0.00341813	0.102592	EIF4G3
peak_13735	1.88345	-2.15362	8.56293	0.00343077	0.102881	KRT17P2
peak_3243	2.13342	-2.45917	8.55322	0.00344912	0.103341	CDC42BPA
peak_12500	1.57599	-2.00317	8.5469	0.00346111	0.10361	MIR9901
peak_7841	-1.55328	-0.954266	8.54495	0.00346481	0.10363	SLC16A7
peak_5086	-1.07305	1.1074	8.53512	0.00348359	0.104101	LRRC27
peak_17736	2.01066	-2.26167	8.53301	0.00348762	0.10412	TRPM4
peak_7413	1.44934	-1.43112	8.53162	0.00349029	0.10412	PPHLN1
peak_28685	-1.93267	-1.54447	8.52847	0.00349633	0.10421	LINC02537
peak_16115	1.86375	-2.33982	8.52347	0.00350596	0.104406	MATK
peak_13078	1.89379	-2.46078	8.51724	0.00351797	0.104654	KLHDC4
peak_6895	2.90725	-2.88482	8.51561	0.00352113	0.104654	APLP2
peak_14204	2.30672	-2.29691	8.51437	0.00352353	0.104654	HAP1
peak_11653	1.92393	-2.53007	8.51283	0.00352651	0.104654	SLCO3A1
peak_30697	-6.25015	-2.95357	8.50863	0.00353466	0.104806	TEX47
peak_23968	1.58192	-1.5712	8.50354	0.00354457	0.105009	RIOX2
peak_31403	2.28513	-2.32073	8.48747	0.003576	0.105848	INSIG1
peak_17522	-0.804776	0.974266	8.48499	0.00358088	0.105873	FOSB
peak_26876	1.49697	-0.808631	8.48373	0.00358337	0.105873	LOC285638
peak_27384	1.75941	-1.92249	8.48234	0.0035861	0.105873	LARP1
peak_20942	2.38188	-2.27675	8.46585	0.00361876	0.106715	DEFB124
peak_15574	-2.01246	-1.71501	8.46481	0.00362083	0.106715	SETBP1
peak_29049	2.20206	-2.3907	8.4515	0.00364742	0.107363	SEC63
peak_13900	-1.33127	-0.673099	8.44838	0.00365369	0.107363	SSH2
peak_19070	1.66539	-1.25662	8.44712	0.00365622	0.107363	PARTICL
peak_6266	1.57699	-1.75015	8.44633	0.0036578	0.107363	FAM168A
peak_15156	1.54303	-1.89627	8.44476	0.00366097	0.107363	LOC101928855
peak_2885	-0.869035	0.40584	8.44444	0.00366161	0.107363	LINC01353
peak_34115	2.23878	-2.61033	8.43698	0.00367666	0.107712	PNPLA7
peak_22473	1.78474	-2.10498	8.42019	0.00371076	0.108574	RFPL3
peak_33605	2.65853	-2.93112	8.4194	0.00371239	0.108574	CDK5RAP2
peak_9436	1.62149	-1.37046	8.40927	0.00373314	0.109088	GRTP1
peak_16445	0.82766	-0.129674	8.40336	0.00374529	0.109171	KANK2
peak_6600	-1.00361	-0.0393282	8.40217	0.00374773	0.109171	ZBTB16
peak_20622	0.813428	0.53597	8.40208	0.00374792	0.109171	RBCK1
peak_26287	2.34086	-2.75787	8.40154	0.00374904	0.109171	SNORD170
peak_19777	1.84521	-2.43904	8.40014	0.00375191	0.109171	KLHL41
peak_21149	2.36559	-2.76355	8.39218	0.00376839	0.109558	KIAA1755
peak_33089	2.0511	-2.23352	8.38945	0.00377405	0.10963	ALDH1B1
peak_29910	2.16996	-2.69404	8.37772	0.00379848	0.110246	SLC29A4
peak_30154	1.66409	-1.8359	8.3683	0.00381822	0.110725	LOC102724484
peak_5962	2.12136	-1.91026	8.36385	0.0038276	0.110839	MIR6749
peak_13473	1.71003	-2.07169	8.36336	0.00382862	0.110839	BCL6B
peak_15379	1.99203	-2.50536	8.36092	0.00383377	0.110895	MIR7153
peak_15395	1.44148	-1.89111	8.35533	0.00384559	0.111143	TUBB6
peak_24867	1.4326	-1.75874	8.3468	0.00386368	0.111572	PIGZ
peak_30033	1.80083	-2.26006	8.34466	0.00386823	0.111609	ABCB5
peak_14473	1.8021	-2.41964	8.34146	0.00387504	0.111712	PHB
peak_728	1.86815	-2.39561	8.33093	0.00389756	0.112267	WASF2
peak_23004	2.30971	-2.53538	8.3218	0.00391721	0.112738	CPT1B
peak_26207	2.10349	-2.17318	8.30983	0.00394311	0.113248	SLC6A3
peak_26521	-0.897796	0.147484	8.30926	0.00394434	0.113248	C5orf67
peak_26511	1.97067	-1.73943	8.30682	0.00394966	0.113248	FLJ31104
peak_13854	1.45008	-1.64371	8.30674	0.00394983	0.113248	SDF2
peak_10524	1.79684	-1.68488	8.30596	0.00395151	0.113248	ASPG
peak_11654	1.96894	-2.44175	8.30448	0.00395474	0.113248	SLCO3A1
peak_22826	2.2409	-2.72276	8.3013	0.00396168	0.113263	MPPED1
peak_4	2.01537	-2.57145	8.29962	0.00396534	0.113263	FAM41C
peak_15694	1.86895	-1.44259	8.29932	0.003966	0.113263	LOC100505549
peak_4427	1.89084	-2.51458	8.29819	0.00396846	0.113263	DLG5
peak_21217	2.64877	-3.02655	8.29325	0.00397927	0.113379	JPH2
peak_26067	1.47717	-1.2069	8.29257	0.00398077	0.113379	FBXO8
peak_16733	1.72387	-2.27466	8.28896	0.00398868	0.113379	CPAMD8
peak_162	1.7657	-2.24039	8.28866	0.00398933	0.113379	GPR153
peak_25651	-1.13299	-0.419816	8.28626	0.00399462	0.113379	LOC101929353
peak_17305	-1.19838	-0.496234	8.28625	0.00399464	0.113379	CYP2A6
peak_32876	2.566	-3.08695	8.28486	0.0039977	0.113379	SH3GL2
peak_7665	1.92569	-2.27117	8.28429	0.00399895	0.113379	SP7
peak_1861	2.36034	-2.8285	8.27158	0.00402705	0.114081	LINC01762
peak_24030	1.98527	-2.50365	8.26414	0.00404359	0.114447	CBLB
peak_11787	1.97267	-1.87917	8.26149	0.00404949	0.114447	DECR2
peak_31193	2.0479	-2.53023	8.26039	0.00405195	0.114447	PARP12
peak_15844	1.88158	-2.02735	8.25977	0.00405333	0.114447	CTDP1
peak_27847	1.55217	-1.69965	8.24467	0.00408719	0.115287	HULC
peak_3546	1.47859	-1.3237	8.24284	0.00409131	0.115287	LOC101927762
peak_2930	2.07254	-2.38338	8.24202	0.00409315	0.115287	LRRN2
peak_23063	-1.34085	-0.183034	8.23135	0.00411729	0.115872	LMCD1-AS1
peak_26232	2.32111	-2.75459	8.22846	0.00412386	0.115962	CTD-2194D22.4
peak_17166	1.76268	-2.29366	8.22249	0.00413745	0.116248	CATSPERG
peak_43	1.86214	-2.19438	8.20595	0.00417534	0.117217	ANKRD65
peak_2853	1.08883	-0.878025	8.20007	0.00418887	0.117501	ARL8A
peak_27432	1.61639	-1.22701	8.19653	0.00419706	0.117634	LINC02227
peak_16389	1.83134	-2.22691	8.1937	0.00420362	0.117722	ICAM3
peak_16913	1.78357	-1.89882	8.19198	0.0042076	0.117737	ZNF737
peak_11831	1.79073	-2.20705	8.1879	0.00421706	0.11781	BAIAP3
peak_4132	1.68924	-1.97135	8.18702	0.00421912	0.11781	SNORA74C-2
peak_1625	-1.41487	-0.865625	8.18554	0.00422257	0.11781	MFSD14A
peak_16108	1.77585	-2.35291	8.18447	0.00422504	0.11781	APBA3
peak_22059	1.05262	-0.549412	8.18347	0.00422738	0.11781	COL6A2
peak_1209	1.79316	-2.41604	8.18007	0.00423532	0.117936	TAL1
peak_17912	-0.798643	0.514193	8.17272	0.0042525	0.118318	ZNF331
peak_12556	-1.87215	-0.766703	8.15889	0.00428506	0.119045	BRD7
peak_25230	-1.45871	-1.03733	8.15868	0.00428556	0.119045	KLF3-AS1
peak_9624	1.61285	-2.06982	8.15103	0.00430367	0.119451	NFATC4
peak_33874	-1.28436	-0.79344	8.14022	0.0043294	0.120068	FAM78A
peak_19785	1.41788	-1.79146	8.13261	0.00434761	0.120476	UBR3
peak_29787	0.968995	-0.613479	8.12235	0.00437229	0.121039	GPR146
peak_15406	-2.05943	-1.41697	8.12123	0.00437498	0.121039	PTPN2
peak_3782	2.31552	-2.5371	8.10169	0.00442241	0.122252	MEIG1
peak_14462	1.33403	-1.50672	8.09295	0.00444377	0.122658	FLJ40194
peak_4491	1.69486	-1.49473	8.09277	0.00444423	0.122658	LOC101929574
peak_12342	1.84698	-2.23377	8.08977	0.00445158	0.122762	RRN3P2
peak_8082	-2.28144	-2.14142	8.08621	0.00446032	0.122904	UBE2N
peak_8967	1.47808	-2.00306	8.07612	0.00448523	0.123491	MIR5006
peak_32578	1.68258	-1.84789	8.0711	0.00449769	0.123735	LOC101927798
peak_12454	1.01144	-0.589933	8.06908	0.0045027	0.123774	HSD3B7
peak_121	1.79347	-1.75545	8.06309	0.0045176	0.124084	TTC34
peak_5941	2.15734	-2.5799	8.05947	0.00452663	0.124232	NRXN2
peak_426	1.12612	-0.897412	8.05398	0.00454038	0.12451	CROCC
peak_29597	1.72755	-1.95126	8.04684	0.0045583	0.124902	LINC02529
peak_18046	2.70263	-2.88869	8.03023	0.0046003	0.125952	USP29
peak_10300	-1.46489	-1.03121	8.0263	0.00461028	0.126125	TC2N
peak_18317	2.25019	-2.8469	8.01954	0.00462754	0.126423	NBAS
peak_5720	2.25019	-2.8469	8.01914	0.00462855	0.126423	OR10AG1
peak_17821	1.89855	-1.87628	8.01314	0.00464391	0.126742	SHANK1
peak_7623	-0.929501	0.0199834	8.01086	0.00464976	0.1268	KRT74
peak_13935	2.0117	-2.46379	8.00933	0.00465369	0.126807	ADAP2
peak_26103	-2.11061	-1.92535	7.99978	0.0046783	0.127376	ENPP6
peak_20778	-2.12072	-1.90636	7.99586	0.00468844	0.127381	MKKS
peak_22931	2.42522	-2.73963	7.99562	0.00468907	0.127381	LOC339685
peak_15697	2.10696	-2.45372	7.99478	0.00469123	0.127381	NEDD4L
peak_31068	2.5337	-2.89317	7.99397	0.00469334	0.127381	SMKR1
peak_22892	2.02107	-2.63469	7.98474	0.00471732	0.127931	MIRLET7BHG
peak_15447	1.8419	-2.49642	7.97582	0.00474064	0.128391	MIR3156-2
peak_10086	1.06761	-0.92244	7.9745	0.00474409	0.128391	MIR4505
peak_3249	2.18515	-2.58715	7.97395	0.00474552	0.128391	ZNF847P
peak_15407	1.69101	-2.01985	7.97158	0.00475173	0.128458	PTPN2
peak_2343	-1.51837	-1.10172	7.96994	0.00475606	0.128473	IFI16
peak_21190	2.4962	-2.87293	7.95661	0.0047912	0.129111	CHD6
peak_27132	-6.33815	-2.97692	7.95423	0.00479752	0.129111	LOC105379194
peak_28375	-0.899887	-0.0353394	7.95378	0.0047987	0.129111	HSD17B8
peak_7143	-0.846621	0.646935	7.95228	0.00480269	0.129111	LOC374443
peak_14627	1.88617	-2.45881	7.95187	0.00480378	0.129111	MIR4729
peak_22227	-1.12955	-0.551974	7.95168	0.00480428	0.129111	YPEL1
peak_29617	1.98855	-2.44887	7.95103	0.004806	0.129111	AGPAT4-IT1
peak_19211	-2.7194	-2.24425	7.94052	0.00483401	0.129762	INPP4A
peak_22286	-0.964148	0.265531	7.92577	0.00487356	0.130614	FBXW4P1
peak_30397	-2.25014	-2.16257	7.92489	0.00487593	0.130614	IKZF1
peak_20692	1.83032	-1.96218	7.92415	0.00487793	0.130614	ATRN
peak_6276	1.94659	-2.38234	7.92249	0.00488239	0.130614	PAAF1
peak_25289	-1.16539	-0.173333	7.92161	0.00488479	0.130614	ATP8A1
peak_31448	2.13692	-2.41832	7.91944	0.00489065	0.130669	LOC100506585
peak_26298	1.85919	-2.18877	7.91512	0.00490234	0.130761	LOC401176
peak_29363	-1.37232	-0.807894	7.91409	0.00490513	0.130761	TXLNB
peak_22744	1.7471	-2.23635	7.91289	0.00490837	0.130761	XRCC6
peak_866	1.34768	-1.16285	7.91254	0.00490933	0.130761	FAM229A
peak_8029	-0.929847	-0.0559459	7.90399	0.00493258	0.131278	DUSP6
peak_25069	1.92176	-2.32132	7.89038	0.00496984	0.132167	MIR95
peak_12952	2.18346	-2.76305	7.88592	0.00498212	0.132391	LOC100129617
peak_20512	2.18344	-2.76305	7.88359	0.00498854	0.132459	LOC100287387
peak_2743	1.7131	-1.9054	7.87571	0.00501031	0.132934	LINC01037
peak_3269	1.86528	-2.45171	7.86943	0.00502775	0.133224	IBA57
peak_4992	2.07068	-2.48976	7.86898	0.00502901	0.133224	FAM53B-AS1
peak_10020	1.67151	-2.25085	7.86377	0.00504352	0.133376	EXD2
peak_10499	1.66281	-2.19509	7.86324	0.00504498	0.133376	LINC00605
peak_31423	2.14417	-2.68841	7.86041	0.00505289	0.133376	DNAJB6
peak_22125	2.14417	-2.68841	7.85998	0.00505409	0.133376	LINC00528
peak_20546	1.93189	-1.75757	7.85994	0.0050542	0.133376	GPC1
peak_22163	1.09099	-0.9051	7.8529	0.00507391	0.133794	COMT
peak_5708	-0.846208	0.717105	7.84881	0.00508541	0.133994	PTPRJ
peak_25963	-1.34933	-1.01943	7.84445	0.0050977	0.134215	TMEM131L
peak_19356	2.1331	-2.62474	7.84211	0.00510431	0.134286	ACOXL
peak_24088	1.47629	-1.69843	7.83747	0.00511741	0.134527	NEPRO
peak_1131	2.5002	-2.94253	7.83426	0.00512652	0.134589	MIR6079
peak_24395	1.82947	-2.43044	7.83387	0.00512761	0.134589	TFDP2
peak_28476	-0.879508	0.0924391	7.83216	0.00513248	0.134614	MAPK13
peak_6683	-0.958351	-0.0346217	7.82134	0.00516328	0.135318	IFT46
peak_31328	-0.828434	0.194858	7.81936	0.00516895	0.135358	GIMAP2
peak_30576	-1.38274	-0.892886	7.81792	0.00517308	0.135358	LAT2
peak_33092	1.78243	-2.30236	7.81668	0.00517663	0.135358	FAM95C
peak_22495	1.65956	-2.09553	7.81459	0.00518262	0.135411	RASD2
peak_15463	-1.87168	-1.21205	7.80165	0.00521985	0.13628	CTAGE1
peak_22472	1.68852	-2.15644	7.79967	0.00522557	0.136315	SLC5A4-AS1
peak_13659	2.10999	-2.73353	7.79688	0.00523365	0.136315	MIR1288
peak_33679	-1.12491	-0.375373	7.79638	0.00523509	0.136315	ARPC5L
peak_16582	2.01792	-2.22649	7.79489	0.00523943	0.136315	PODNL1
peak_26646	1.43928	-1.98349	7.79286	0.00524531	0.136315	ANKRD31
peak_33722	1.43927	-1.98349	7.79233	0.00524685	0.136315	GARNL3
peak_13418	1.47806	-2.05342	7.79159	0.00524901	0.136315	PLD2
peak_22291	1.65787	-2.09523	7.78864	0.00525758	0.136435	LINC01659
peak_18541	2.33806	-2.82436	7.77973	0.00528357	0.136948	CRIM1-DT
peak_20837	-1.03413	-0.24085	7.77783	0.00528912	0.136948	INSM1
peak_19	1.37308	-1.81239	7.77775	0.00528935	0.136948	RNF223
peak_10395	-2.04476	-1.97524	7.76819	0.00531743	0.137436	BCL11B
peak_11996	1.35859	-1.76159	7.76769	0.00531891	0.137436	MIR6769A
peak_16118	1.82368	-2.27545	7.76611	0.00532355	0.137436	MIR637
peak_24448	1.86389	-2.56532	7.76589	0.00532422	0.137436	SIAH2
peak_31265	1.94207	-2.54214	7.76208	0.00533544	0.137622	NOBOX
peak_5879	-0.842547	0.100289	7.75608	0.00535321	0.137869	WDR74
peak_31794	2.60339	-2.80465	7.75565	0.00535447	0.137869	DUSP4
peak_21502	2.215	-2.60643	7.75478	0.00535707	0.137869	LSM14B
peak_21649	2.02431	-2.6369	7.7453	0.00538526	0.138491	TPTE
peak_3757	1.59768	-2.21526	7.73966	0.0054021	0.13882	FRMD4A
peak_23444	2.01404	-2.41031	7.72491	0.00544642	0.139854	CTNNB1
peak_23655	1.19725	-1.36534	7.71899	0.0054643	0.140208	RNF123
peak_9573	1.67795	-1.46834	7.71586	0.00547377	0.140346	RNF212B
peak_11767	1.92566	-2.32308	7.71086	0.00548897	0.140508	HBM
peak_21009	1.69307	-1.85332	7.70984	0.00549206	0.140508	BPIFA4P
peak_30811	-0.932507	-0.0919654	7.70974	0.00549237	0.140508	PVRIG
peak_3258	1.70214	-1.82182	7.70605	0.0055036	0.14058	MIR5008
peak_15860	2.11623	-2.51279	7.7051	0.0055065	0.14058	SHC2
peak_12177	2.11623	-2.51279	7.70478	0.00550747	0.14058	ACSM1
peak_9498	2.18975	-2.76469	7.70101	0.005519	0.140769	RNASE10
peak_16544	-1.03598	-0.335944	7.69632	0.00553336	0.141031	NFIX
peak_3106	1.78885	-2.07235	7.69491	0.00553768	0.141036	RPS6KC1
peak_33797	1.83216	-2.33097	7.68372	0.00557212	0.141808	TBC1D13
peak_9701	1.67122	-1.84491	7.68059	0.00558178	0.141949	LRFN5
peak_13772	1.63244	-1.73869	7.67857	0.00558805	0.142003	AKAP10
peak_33108	1.98616	-2.56425	7.67632	0.00559501	0.142074	FLJ43315
peak_24053	-1.84278	-1.62132	7.67476	0.00559986	0.142092	MIR4445
peak_222	1.58938	-2.21114	7.66829	0.00561998	0.142478	SLC2A5
peak_17245	1.70486	-1.54553	7.66558	0.00562842	0.142478	FCGBP
peak_4294	2.00057	-1.93543	7.66502	0.00563018	0.142478	PALD1
peak_7385	1.31493	-1.20299	7.66399	0.00563339	0.142478	PKP2
peak_9751	1.52722	-2.02831	7.66227	0.00563876	0.142478	DMAC2L
peak_31884	1.61466	-1.66464	7.66187	0.00563999	0.142478	ADAM5
peak_17217	1.0759	-0.953251	7.65996	0.00564598	0.142525	LRFN1
peak_12816	1.61459	-1.66464	7.65602	0.00565831	0.142731	CLEC18A
peak_17270	2.08076	-1.60432	7.6544	0.00566341	0.142754	MIR6796
peak_6773	-0.986463	-0.179332	7.636	0.00572148	0.144077	UBASH3B
peak_12495	1.36462	0.548372	7.63511	0.00572429	0.144077	LOC105369266
peak_4841	-0.929163	0.0635424	7.62685	0.00575058	0.144633	DUSP5
peak_3507	1.55636	-2.19511	7.61697	0.00578216	0.145149	OR2M2
peak_20907	1.81933	-1.63682	7.61668	0.00578308	0.145149	NINL
peak_24406	2.08354	-2.55223	7.61588	0.00578564	0.145149	CHST2
peak_17818	1.69929	-2.266	7.61514	0.00578802	0.145149	C19orf81
peak_29125	-1.77637	-1.29149	7.61047	0.00580302	0.145419	FYN
peak_6680	-0.84366	0.498131	7.60443	0.00582249	0.1458	KMT2A
peak_7375	2.14227	-2.57819	7.60164	0.00583151	0.14592	RESF1
peak_11791	1.09899	-0.308481	7.59943	0.00583869	0.145993	RAB11FIP3
peak_32191	2.26529	-2.79495	7.59589	0.00585016	0.146173	CNGB3
peak_4455	2.03741	-2.42637	7.59169	0.00586379	0.146407	PPIF
peak_22427	2.20861	-2.656	7.58992	0.00586954	0.146444	SEC14L4
peak_6932	2.31733	-2.70462	7.57883	0.00590577	0.147241	B3GAT1
peak_20506	-1.49689	-0.999074	7.57015	0.00593428	0.147844	PER2
peak_18995	1.87599	-1.42832	7.56752	0.00594294	0.147952	BOLA3
peak_30817	-1.04449	0.196528	7.56273	0.00595876	0.148239	PILRA
peak_2004	2.05544	-1.44886	7.55985	0.00596828	0.148368	GPR89B
peak_23951	1.54462	-2.03766	7.54609	0.00601404	0.149333	PROS1
peak_434	1.92436	-1.89179	7.54556	0.0060158	0.149333	PADI2
peak_16651	1.70552	-2.32255	7.52243	0.00609356	0.151154	MIR6795
peak_3742	2.20829	-2.2669	7.51973	0.00610268	0.151216	MIR4480
peak_33177	2.41797	-2.85622	7.51908	0.00610488	0.151216	GNA14
peak_10197	-2.04128	-1.97358	7.51391	0.00612242	0.151541	CEP128
peak_14630	2.76217	-3.15751	7.50584	0.00614993	0.152032	LINC01476
peak_28263	2.70009	-3.11028	7.5051	0.00615247	0.152032	LINC02571
peak_26983	2.09402	-2.55606	7.50385	0.00615671	0.152032	2022-03-03
peak_10530	1.43663	-1.1617	7.50224	0.00616223	0.152032	INF2
peak_5256	1.90165	-2.58341	7.5016	0.00616442	0.152032	C11orf21
peak_15251	1.90293	-2.47185	7.49627	0.00618269	0.152317	MIR4525
peak_2251	2.48888	-2.75269	7.49564	0.00618484	0.152317	DAP3
peak_9491	1.51192	-1.97369	7.48648	0.0062164	0.152984	KLHL33
peak_30983	1.77277	-2.46704	7.48333	0.00622729	0.15305	LOC101928012
peak_27915	1.795	-2.36603	7.48312	0.00622799	0.15305	CD83
peak_18118	1.45943	-1.99375	7.4785	0.006244	0.153333	SH3YL1
peak_14817	-1.43775	-1.17164	7.47594	0.00625289	0.153442	AMZ2
peak_28163	-1.52365	-0.979451	7.4735	0.00626137	0.153481	ZSCAN23
peak_22000	1.78234	-2.30774	7.4726	0.0062645	0.153481	SUMO3
peak_16940	1.78233	-2.30774	7.47162	0.0062679	0.153481	ZNF257
peak_32986	2.42368	-2.85878	7.4694	0.00627565	0.153561	DCAF12
peak_17247	1.80593	-2.54015	7.4678	0.00628122	0.153588	FCGBP
peak_10290	1.74081	-2.23625	7.46352	0.00629617	0.153844	CCDC88C
peak_12514	1.64462	-2.09049	7.4619	0.00630184	0.153873	DNAJA2
peak_4468	1.64199	-2.29096	7.46035	0.00630727	0.153896	SFTPD
peak_927	2.1648	-2.75901	7.45766	0.00631672	0.153948	TFAP2E
peak_6619	2.29356	-2.63977	7.45718	0.00631841	0.153948	LOC105369509
peak_8682	-1.25784	-0.0964549	7.45504	0.00632589	0.154021	FBRSL1
peak_2858	-1.56448	-0.62479	7.44656	0.00635579	0.15464	LGR6
peak_13229	1.77272	-2.40883	7.436	0.00639319	0.155439	LOC100506388
peak_24956	1.47001	-1.86162	7.42578	0.0064296	0.156182	NAT8L
peak_7342	2.08139	-2.7836	7.42487	0.00643284	0.156182	TMTC1
peak_33326	2.26223	-2.92154	7.41703	0.00646095	0.156583	BICD2
peak_31775	-0.939431	0.373878	7.41667	0.00646224	0.156583	ZNF395
peak_10416	-1.52434	-1.22744	7.41644	0.00646306	0.156583	EVL
peak_33149	2.3167	-2.69065	7.40534	0.00650304	0.157441	LINC01474
peak_20924	2.36509	-2.90025	7.40257	0.00651307	0.157572	MIR4477B
peak_14950	0.780554	-0.0630174	7.39965	0.00652367	0.157718	UNC13D
peak_5721	1.85808	-2.56365	7.39536	0.00653925	0.157983	OR8K1
peak_15008	1.93073	-2.65621	7.38891	0.00656272	0.158438	LINC02080
peak_12466	1.06155	-0.321143	7.38098	0.00659174	0.159027	PYCARD-AS1
peak_9362	1.61881	-2.28059	7.37476	0.00661458	0.159443	FAM155A-IT1
peak_7810	2.04363	-2.6419	7.37294	0.00662124	0.159443	MIR6758
peak_18600	-2.26971	-2.13439	7.37208	0.00662443	0.159443	LINC01913
peak_16992	2.76508	-3.00234	7.37122	0.00662759	0.159443	URI1
peak_23367	1.9594	-2.67262	7.36691	0.00664352	0.159642	FBXL2
peak_3536	2.02913	-2.14871	7.36486	0.00665107	0.159642	LOC101930421
peak_406	1.67276	-2.0602	7.36357	0.00665585	0.159642	RNU1-4
peak_11269	0.960503	-0.728639	7.3627	0.00665909	0.159642	UACA
peak_3694	1.84032	-2.38839	7.36269	0.00665912	0.159642	LINC00709
peak_13631	1.3467	-1.13752	7.36001	0.00666903	0.15975	MYOCD
peak_18166	1.53964	-1.94407	7.35896	0.00667293	0.15975	LINC01304
peak_16405	-1.39846	-0.780519	7.35153	0.00670058	0.1603	S1PR5
peak_31952	1.65181	-2.24392	7.34398	0.00672878	0.160859	UBE2V2
peak_29727	2.08827	-2.61305	7.3417	0.00673732	0.160859	LOC154449
peak_17798	-1.61952	-1.43825	7.34151	0.00673803	0.160859	VRK3
peak_11594	1.49006	-2.10997	7.33882	0.00674811	0.160931	SEMA4B
peak_22196	2.15377	-2.37158	7.33821	0.00675041	0.160931	POM121L4P
peak_27938	-0.911054	0.116065	7.31953	0.00682091	0.162499	JARID2
peak_28201	1.48795	-1.96145	7.31411	0.00684151	0.162876	TRIM40
peak_681	1.83716	-2.43711	7.31061	0.00685486	0.162908	PIGV
peak_24894	1.91604	-1.71335	7.30945	0.00685928	0.162908	PDE6B
peak_2630	1.56895	-1.96028	7.30883	0.00686164	0.162908	PAPPA2
peak_17401	1.84433	-2.44631	7.30878	0.00686185	0.162908	PSG3
peak_34283	1.42992	-1.3615	7.30471	0.00687741	0.163165
peak_17404	1.82398	-2.32917	7.30141	0.00689004	0.163352	CD177
peak_30725	-1.38614	-1.09839	7.2971	0.00690661	0.163631	FAM133B
peak_13978	1.46978	-1.73746	7.28017	0.006972	0.165067	MYO1D
peak_11780	1.33749	-1.74677	7.27865	0.00697788	0.165092	AXIN1
peak_26338	1.96493	-2.3978	7.27495	0.00699227	0.165318	MIR4279
peak_4879	1.70514	-2.078	7.27219	0.00700303	0.165459	NRAP
peak_817	1.64555	-2.18996	7.27033	0.00701028	0.165516	NKAIN1
peak_13397	-0.733701	1.00735	7.26823	0.00701851	0.165596	UBE2G1
peak_21462	2.03416	-2.33159	7.25798	0.00705867	0.166429	APCDD1L
peak_34126	1.39855	-1.86799	7.2531	0.00707787	0.166742	LOC651337
peak_26199	2.17966	-1.68285	7.25207	0.00708192	0.166742	TERT
peak_22555	1.98473	-1.93231	7.25091	0.00708649	0.166742	SSTR3
peak_32935	1.23195	-1.38029	7.24202	0.00712166	0.167454	LINGO2
peak_16771	2.18705	-2.44365	7.23783	0.0071383	0.167731	UNC13A
peak_16973	1.60805	-2.22229	7.21964	0.00721102	0.169323	LINC00906
peak_22929	2.18947	-2.71308	7.19637	0.00730513	0.171302	TBC1D22A-AS1
peak_33219	2.03066	-2.70239	7.19605	0.00730643	0.171302	NTRK2
peak_12901	2.18945	-2.71308	7.19511	0.00731026	0.171302	CHST5
peak_1616	1.59708	-1.6951	7.19247	0.00732101	0.171437	PTBP2
peak_21270	1.70155	-1.97801	7.18994	0.00733135	0.171562	CDH22
peak_20593	-1.3295	-0.589779	7.18043	0.00737032	0.172356	NEU4
peak_33783	1.34374	-1.51514	7.16926	0.00741634	0.173314	CERCAM
peak_1681	2.00171	-2.75152	7.15936	0.00745738	0.174052	NBPF6
peak_6742	2.00171	-2.75152	7.15915	0.00745826	0.174052	TECTA
peak_122	1.57972	-1.31992	7.15737	0.00746565	0.174052	TTC34
peak_9413	1.8665	-2.57243	7.15641	0.00746967	0.174052	ATP11A
peak_33331	1.93286	-0.983347	7.15537	0.00747401	0.174052	ANKRD19P
peak_10441	1.7831	-2.07381	7.15432	0.00747836	0.174052	MIR379
peak_5855	-0.862428	0.685095	7.13624	0.00755415	0.175697	MTA2
peak_3385	1.803	-2.4836	7.13481	0.00756016	0.175713	ARID4B
peak_21133	1.59573	-2.0676	7.13364	0.00756509	0.175713	SRC
peak_28527	1.79753	-2.48189	7.12624	0.00759637	0.17632	RNF8
peak_2313	-0.802205	1.33605	7.12429	0.00760466	0.176393	SH2D2A
peak_14152	1.65659	-1.92355	7.11967	0.00762429	0.176729	THRA
peak_27409	-0.772419	0.269898	7.11602	0.00763981	0.176969	CYFIP2
peak_26208	1.67077	-2.15492	7.10853	0.0076718	0.17759	SLC6A3
peak_6914	2.43929	-3.12679	7.10573	0.00768381	0.177748	LINC02743
peak_11214	1.94564	-2.6687	7.09938	0.00771106	0.178258	CLN6
peak_15272	1.86589	-2.35099	7.09356	0.00773615	0.178718	B3GNTL1
peak_14990	-0.781426	0.875851	7.08338	0.00778022	0.179405	PRCD
peak_21823	-1.44655	-1.16238	7.08311	0.00778139	0.179405	DOP1B
peak_21784	-0.841031	0.0251611	7.08307	0.00778155	0.179405	LINC00649
peak_6390	1.4846	-1.74767	7.07815	0.00780293	0.179777	MIR4300HG
peak_7098	-1.09444	-0.582695	7.0726	0.00782718	0.18004	SLC2A3
peak_8678	1.03018	-0.981472	7.07058	0.00783598	0.18004	FBRSL1
peak_4889	2.00952	-2.69678	7.07005	0.00783832	0.18004	VWA2
peak_8278	-0.776553	0.358586	7.06992	0.00783888	0.18004	SSH1
peak_580	-0.853053	0.654848	7.06952	0.00784062	0.18004	MIR6731
peak_3701	-1.2962	-0.965579	7.05359	0.00791064	0.181527	CELF2
peak_15134	1.56653	-1.75477	7.05126	0.00792097	0.181642	SLC26A11
peak_15296	1.54752	-1.85749	7.04529	0.00794738	0.18207	CLUL1
peak_5043	2.17765	-2.71141	7.043	0.00795756	0.18207	MIR4297
peak_33837	1.19062	-1.04531	7.04288	0.0079581	0.18207	PTGES
peak_15779	1.00028	-0.41566	7.04226	0.00796085	0.18207	TSHZ1
peak_16705	1.77071	-2.11445	7.0394	0.00797356	0.182122	KLF2
peak_880	1.71126	-2.22596	7.03936	0.00797374	0.182122	KIAA1522
peak_33243	1.83949	-2.61995	7.03547	0.00799111	0.182397	CTSL
peak_12009	1.65708	-2.19525	7.03359	0.00799947	0.182467	RBFOX1
peak_27400	-0.785358	0.823029	7.03145	0.00800906	0.182479	MED7
peak_17178	1.55555	-1.70828	7.03109	0.00801066	0.182479	LOC105372397
peak_21914	1.63448	-1.48173	7.02548	0.00803577	0.18293	RSPH1
peak_13081	2.04968	-2.54457	7.02096	0.0080561	0.183271	KLHDC4
peak_8640	1.28911	-0.130282	7.01032	0.00810413	0.184241	RIMBP2
peak_24398	-1.07894	-0.414528	7.00724	0.0081181	0.184327	GK5
peak_6779	-1.17893	-0.649711	7.00712	0.00811864	0.184327	CRTAM
peak_16863	1.90327	-2.37148	7.00098	0.00814651	0.184837	SLC25A42
peak_20704	1.7159	-2.22773	6.99643	0.00816723	0.185185	CDC25B
peak_12476	-1.43072	-1.30452	6.9901	0.00819618	0.185719	ITGAX
peak_32658	1.99393	-2.68438	6.98786	0.00820644	0.185828	CDC42P3
peak_7697	1.43423	-1.84427	6.9824	0.00823153	0.186209	NFE2
peak_6473	1.73601	-2.39645	6.98055	0.00824002	0.186209	SESN3
peak_20925	1.5898	-1.93074	6.97976	0.00824366	0.186209	MIR4477B
peak_22077	2.13562	-2.75331	6.97948	0.00824496	0.186209	DIP2A
peak_4531	1.19557	-1.07754	6.97046	0.00828664	0.186962	MINPP1
peak_2086	0.756255	-0.0930553	6.9699	0.00828921	0.186962	CERS2
peak_6930	-1.20658	-0.86077	6.96327	0.00831997	0.187533	GLB1L2
peak_22770	1.87077	-2.57411	6.95924	0.00833873	0.187782	LOC101929829
peak_5343	0.800278	-0.158505	6.9575	0.00834686	0.187782	APBB1
peak_22448	1.84244	-2.2842	6.95737	0.00834746	0.187782	PIK3IP1
peak_29692	1.64583	-1.28087	6.94986	0.00838258	0.188449	LOC105378146
peak_21750	1.19686	-1.50789	6.94706	0.00839573	0.188621	OLIG1
peak_17932	1.18499	-1.39101	6.94471	0.00840675	0.188745	TMC4
peak_20134	-0.711375	1.235	6.94177	0.00842057	0.188902	MIR7845
peak_14786	-0.871208	0.292718	6.94088	0.00842475	0.188902	PITPNC1
peak_1938	1.94694	-2.60575	6.93967	0.00843048	0.188907	LSP1P5
peak_33461	1.68578	-1.98295	6.93687	0.00844368	0.189079	ERP44
peak_23138	-1.05645	-0.426689	6.93549	0.0084502	0.189101	LINC02022
peak_24849	1.93738	-2.66704	6.93018	0.00847532	0.18954	TM4SF19
peak_17120	-0.814815	0.24402	6.927	0.0084904	0.189654	ZNF529-AS1
peak_31505	2.14739	-2.6425	6.92678	0.00849145	0.189654	LOC401442
peak_23292	1.8007	-2.60127	6.92506	0.0084996	0.189712	LOC101927854
peak_14040	-1.06843	-0.367605	6.92226	0.00851294	0.189886	CCL18
peak_32221	1.35054	-1.25697	6.91964	0.0085254	0.189971	TMEM67
peak_1927	0.964008	-0.613803	6.91914	0.0085278	0.189971	FCGR1CP
peak_28180	1.73829	-2.33087	6.90975	0.00857271	0.190847	HLA-F
peak_3540	1.59368	-2.21713	6.90066	0.00861639	0.191695	DIP2C
peak_24605	1.47035	-2.04991	6.8992	0.00862344	0.191713	NAALADL2-AS1
peak_21046	1.3884	-1.47278	6.89728	0.00863271	0.191713	PIGU
peak_1111	1.19021	-1.29086	6.89702	0.00863398	0.191713	SLC2A1
peak_9283	1.4958	-2.16611	6.89321	0.00865239	0.191998	STK24
peak_9565	1.43501	-1.67974	6.89058	0.00866513	0.192156	LRP10
peak_32535	2.30171	-2.94541	6.88833	0.00867605	0.192274	ASAP1-IT2
peak_21512	0.819838	-0.347343	6.88541	0.00869019	0.192424	ADRM1
peak_15882	1.67496	-1.77695	6.88463	0.00869402	0.192424	PALM
peak_6141	1.40245	-2.01406	6.88095	0.00871191	0.192696	UNC93B1
peak_18979	-0.838557	-0.0490564	6.87814	0.00872565	0.192761	TPRKB
peak_20977	1.86089	-1.8299	6.87804	0.00872611	0.192761	TM9SF4
peak_29802	0.918962	-0.677389	6.86668	0.00878177	0.193819	MAFK
peak_34234	1.41957	-1.56139	6.86596	0.00878528	0.193819
peak_2132	-0.920601	0.358869	6.86371	0.00879636	0.193938	S100A11
peak_24343	1.84932	-2.34749	6.86144	0.00880758	0.194061	STAG1
peak_20129	1.60281	-1.01077	6.85176	0.00885538	0.19498	ZDBF2
peak_28349	-0.854571	0.272365	6.8507	0.00886068	0.19498	TAP2
peak_19353	-2.58924	-2.39929	6.84167	0.00890555	0.195842	NPHP1
peak_18992	2.05687	-2.77795	6.83796	0.00892407	0.196124	TET3
peak_29230	1.72185	-2.28317	6.83609	0.00893343	0.196204	LAMA2
peak_13228	2.25328	-2.74242	6.83063	0.00896074	0.196651	LINC02091
peak_29165	0.869624	-0.438525	6.82973	0.00896526	0.196651	DCBLD1
peak_5017	1.78474	-2.47818	6.82853	0.0089713	0.196658	ADAM12
peak_17536	-1.12194	-0.692575	6.82193	0.00900452	0.19726	EML2-AS1
peak_6389	-0.776463	0.181863	6.81167	0.00905641	0.19827	MIR4300
peak_16030	2.00452	-2.6854	6.81019	0.00906391	0.198308	GADD45B
peak_13654	1.98795	-2.74753	6.80881	0.0090709	0.198334	SNORD163
peak_27963	1.85747	-2.40404	6.80714	0.00907938	0.198393	DTNBP1
peak_24336	2.13135	-2.63856	6.80362	0.00909734	0.198659	EPHB1
peak_5760	1.10343	-0.943642	6.80206	0.00910529	0.198706	LOC283194
peak_14797	1.25458	-1.5784	6.80055	0.009113	0.198748	MIR548AA2
peak_31412	1.80822	-2.42812	6.79493	0.00914173	0.199248	LINC01006
peak_25005	1.47248	-1.8244	6.79349	0.00914909	0.199263	MSANTD1
peak_16613	-0.698446	0.911171	6.79253	0.00915402	0.199263	ADGRE5
peak_30338	1.725	-2.39283	6.79064	0.00916373	0.199347	CAMK2B
peak_7996	-0.717755	0.962571	6.77838	0.00922684	0.200515	ZDHHC17
peak_14915	1.77074	-2.41567	6.77795	0.00922909	0.200515	NT5C
peak_11190	1.44726	-2.14201	6.76843	0.00927846	0.20132	LINC02206
peak_8766	1.63917	-2.29441	6.76829	0.00927915	0.20132	LINC00424
peak_7552	2.10199	-2.68047	6.76653	0.00928832	0.20132	ASIC1
peak_15803	-1.69658	-1.74832	6.76604	0.0092909	0.20132	MBP
peak_31245	0.97822	-0.568833	6.76515	0.0092955	0.20132	EPHB6
peak_3844	1.23243	-1.65134	6.76285	0.0093075	0.201453	SPAG6
peak_17749	1.62142	-0.527364	6.7613	0.00931556	0.2015	ALDH16A1
peak_5723	1.45811	-1.32014	6.7583	0.00933125	0.201569	OR5M8
peak_16702	-0.728577	0.687618	6.75767	0.00933457	0.201569	KLF2
peak_18460	1.55276	-1.4323	6.75732	0.00933637	0.201569	ZNF512
peak_32875	1.77427	-2.592	6.75546	0.00934614	0.201653	CNTLN
peak_26140	1.35411	-1.59721	6.74525	0.00939975	0.202683	FAM149A
peak_24111	-1.0947	-0.459381	6.73792	0.00943846	0.203389	DRD3
peak_22364	1.53129	-2.29516	6.73554	0.00945105	0.203533	MIAT
peak_112	1.09476	0.341675	6.73357	0.00946153	0.203631	MMEL1
peak_18646	1.57075	-1.44644	6.732	0.00946981	0.203681	LRPPRC
peak_1613	1.7296	-2.39456	6.72926	0.00948439	0.203867	LINC02790
peak_32299	-0.711119	0.828973	6.72762	0.00949312	0.203927	YWHAZ
peak_5336	2.43	-2.9324	6.71849	0.00954185	0.204845	CCKBR
peak_16151	-0.825989	1.29549	6.71674	0.0095512	0.204918	CHAF1A
peak_31533	-1.11599	-0.566944	6.71323	0.00957003	0.205022	MIR7160
peak_24976	-1.23559	-0.673453	6.71096	0.00958219	0.205022	FAM193A
peak_21341	1.34509	-1.79727	6.71025	0.00958604	0.205022	LINC01273
peak_10031	2.10037	-2.57046	6.70961	0.00958945	0.205022	LOC646548
peak_8673	-0.712779	0.47276	6.70916	0.00959189	0.205022	DDX51
peak_22061	1.75659	-2.35539	6.70916	0.00959191	0.205022	FTCD-AS1
peak_13204	1.74439	-2.5181	6.70625	0.00960755	0.205228	SPIRE2
peak_22968	1.59712	-2.32858	6.70407	0.0096193	0.205351	MIR6821
peak_13690	0.796783	-0.212103	6.69412	0.00967317	0.206373	PLD6
peak_1739	1.49409	-2.16591	6.68851	0.00970361	0.206769	ALX3
peak_27396	1.56215	-1.87418	6.68848	0.0097038	0.206769	HAVCR1
peak_32916	1.66645	-1.84195	6.68727	0.00971037	0.206781	CDKN2B
peak_33459	-0.773965	1.00654	6.68288	0.0097343	0.207162	NR4A3
peak_9404	2.0851	-2.79612	6.67927	0.00975406	0.207349	LOC100506016
peak_11183	1.19778	-1.10837	6.67907	0.00975517	0.207349	SMAD6
peak_13594	-1.43901	-1.43645	6.67516	0.00977658	0.207605	PIK3R5
peak_5488	2.26635	-2.79987	6.67434	0.00978108	0.207605	ABCC8
peak_16559	1.36682	-1.39501	6.67355	0.00978539	0.207605	IER2
peak_7388	1.82255	-2.38477	6.67124	0.00979808	0.207644	ALG10B
peak_20517	-1.11817	-0.698569	6.67004	0.0098047	0.207644	MGC16025
peak_27717	1.4966	-2.06521	6.66992	0.00980538	0.207644	LINC00266-3
peak_11194	-1.58747	-1.46162	6.66769	0.00981764	0.207722	SMAD3
peak_29302	-1.65785	-1.78321	6.66705	0.00982118	0.207722	PDE7B
peak_15711	-0.762938	0.361077	6.66307	0.00984315	0.207992	PMAIP1
peak_17831	2.06389	-2.25559	6.66254	0.00984607	0.207992	CTU1
peak_16959	1.65184	-2.1498	6.65771	0.0098728	0.208244	LOC100505851
peak_17745	1.35182	-1.67468	6.65714	0.00987596	0.208244	SLC17A7
peak_17791	1.26721	-1.50996	6.65709	0.00987619	0.208244	MIR4750
peak_15610	2.12552	-2.47412	6.64581	0.00993894	0.209368	MIR4527
peak_32687	1.64487	-1.9103	6.64531	0.0099417	0.209368	NAPRT
peak_29795	1.89481	-2.22721	6.63814	0.00998183	0.210084	UNCX
peak_25065	-0.968044	-0.0253422	6.6339	0.0100056	0.210455	AFAP1-AS1
peak_33511	1.84682	-2.68873	6.63249	0.0100135	0.210492	KLF4
peak_19616	1.6908	-2.43262	6.62761	0.010041	0.210785	LOC101928386
peak_19348	-1.80983	-1.88431	6.62734	0.0100425	0.210785	MIR4266
peak_15214	-0.692014	0.86356	6.62675	0.0100459	0.210785	DCXR
peak_22609	1.79033	-2.5414	6.61871	0.0100913	0.211609	BAIAP2L2
peak_9233	1.20838	-1.20478	6.61574	0.0101081	0.211833	SLITRK1
peak_22408	2.23196	-2.62793	6.61052	0.0101378	0.212324	HORMAD2-AS1
peak_3441	1.82613	-2.10358	6.60841	0.0101498	0.212447	MIR4677
peak_16989	1.22966	-1.56461	6.60186	0.0101872	0.213099	CCNE1
peak_21164	-0.954337	-0.0786242	6.59763	0.0102115	0.213477	FAM83D
peak_1320	-0.952611	-0.351148	6.59172	0.0102454	0.214056	LINC01135
peak_12869	-1.34717	-1.24774	6.58625	0.010277	0.214584	C16orf47
peak_23432	2.01483	-2.64692	6.58274	0.0102972	0.214877	ENTPD3
peak_28007	-0.862934	-0.112771	6.57634	0.0103343	0.215519	E2F3
peak_9083	1.53466	-1.48574	6.57431	0.0103461	0.215634	KPNA3
peak_27606	0.710216	0.200331	6.56825	0.0103814	0.216238	UIMC1
peak_28137	-0.943652	-0.264009	6.56335	0.01041	0.216676	HIST1H3H
peak_32473	-1.37549	-0.801228	6.56249	0.0104151	0.216676	MTSS1
peak_26858	1.5825	-2.21374	6.55965	0.0104317	0.21689	RAB9BP1
peak_15639	1.79816	-2.37768	6.55448	0.010462	0.217389	LOC100129878
peak_34123	1.43965	-1.7667	6.5533	0.010469	0.217403	LOC651337
peak_16949	-0.747432	0.442027	6.55027	0.0104868	0.217641	ZNF91
peak_29779	1.76328	-1.27035	6.54843	0.0104977	0.217683	ADAP1
peak_30885	1.84575	-2.24375	6.54708	0.0105056	0.217683	SH2B2
peak_4891	1.77545	-2.47647	6.5467	0.0105079	0.217683	VWA2
peak_17338	2.26169	-2.86485	6.544	0.0105239	0.217883	PCAT19
peak_32188	1.75303	-2.58439	6.53553	0.0105741	0.218791	WWP1
peak_22937	1.86542	-2.35274	6.53017	0.010606	0.219318	TAFA5
peak_1266	-2.4726	-2.45682	6.52621	0.0106296	0.219675	SLC1A7
peak_23064	1.47676	-1.59725	6.52349	0.0106459	0.219878	LMCD1-AS1
peak_8631	-2.22607	-2.16029	6.51938	0.0106705	0.220076	SLC15A4
peak_30417	1.70937	-1.72498	6.51928	0.0106711	0.220076	EGFR-AS1
peak_22480	1.56799	-2.37213	6.51869	0.0106747	0.220076	TIMP3
peak_16823	2.49734	-3.01767	6.51686	0.0106856	0.220146	PGPEP1
peak_23651	1.84429	-2.29641	6.51573	0.0106925	0.220146	BSN-DT
peak_3571	1.6302	-1.99699	6.51418	0.0107018	0.220146	LINC02645
peak_5037	1.47551	0.505708	6.51318	0.0107078	0.220146	LINC01163
peak_139	1.6196	-2.23364	6.51279	0.0107102	0.220146	SMIM1
peak_27383	1.57766	-2.01722	6.50829	0.0107373	0.220571	LARP1
peak_30467	2.27294	-2.81446	6.50547	0.0107543	0.220761	MIR6839
peak_19485	1.04333	-1.11545	6.50463	0.0107594	0.220761	PROC
peak_10208	2.09247	-2.51072	6.49839	0.0107972	0.221357	LINC02301
peak_31199	1.50773	-2.07321	6.49771	0.0108013	0.221357	KDM7A-DT
peak_28924	-1.10558	-0.711938	6.49593	0.0108122	0.221446	UBE2J1
peak_28899	1.66532	-2.14983	6.48257	0.0108937	0.222983	SMIM8
peak_7822	1.62516	-2.34489	6.4767	0.0109298	0.223587	AGAP2-AS1
peak_26921	-1.24144	-0.745958	6.47378	0.0109477	0.223822	TRIM36
peak_13460	-0.823695	-0.062515	6.46875	0.0109788	0.224323	PIMREG
peak_23219	-3.0964	-2.74669	6.46524	0.0110005	0.224632	ANKRD28
peak_2412	-0.762494	0.397861	6.46219	0.0110194	0.224759	ARHGAP30
peak_10734	1.30431	-1.20314	6.46212	0.0110198	0.224759	NANOGP8
peak_5118	1.37467	-1.85847	6.44861	0.0111039	0.226341	LINC01168
peak_16454	1.94274	-2.34127	6.44577	0.0111217	0.226567	PLPPR2
peak_20447	-0.774826	0.434845	6.44468	0.0111285	0.226572	LINC01891
peak_29975	2.17658	-2.83382	6.44158	0.0111479	0.226774	LOC100131257
peak_18404	1.7116	-2.38922	6.44099	0.0111516	0.226774	DTNB
peak_5750	2.187	-2.78185	6.43782	0.0111715	0.226948	OR5B3
peak_31797	-1.08171	-0.731208	6.43752	0.0111734	0.226948	DUSP4
peak_4711	1.67504	-2.42727	6.43245	0.0112054	0.227462	PAX2
peak_31508	1.93857	-2.07242	6.43023	0.0112194	0.227612	LOC105377777
peak_28454	2.15577	-2.33433	6.42919	0.011226	0.227612	PPARD
peak_7710	1.48041	-1.49026	6.41373	0.0113241	0.229466	NCKAP1L
peak_17485	1.41837	-1.9751	6.41263	0.0113311	0.229472	GEMIN7
peak_2329	-1.44168	-1.29145	6.40795	0.011361	0.229942	FCRL5
peak_1233	1.62374	-2.13459	6.40595	0.0113739	0.230066	TTC39A
peak_8242	1.16276	-1.61146	6.39613	0.011437	0.231206	CRY1
peak_9405	1.88443	-2.58914	6.39117	0.0114689	0.231716	LOC100506016
peak_32387	-1.91892	-2.08319	6.38717	0.0114948	0.232102	MED30
peak_895	-0.849572	1.15553	6.38483	0.01151	0.232271	AZIN2
peak_16224	1.69922	-2.22431	6.37879	0.0115492	0.232735	MIR3940
peak_24921	1.68445	-1.8271	6.37857	0.0115506	0.232735	LOC100130872
peak_27345	-1.64368	-1.79433	6.37816	0.0115533	0.232735	TNIP1
peak_5200	1.59126	-0.421649	6.37532	0.0115718	0.232972	DRD4
peak_31960	1.39162	-1.69777	6.37176	0.0115951	0.233265	PXDNL
peak_9655	1.64119	-2.46963	6.3702	0.0116052	0.233265	ARHGAP5
peak_28461	1.66417	-2.31026	6.36996	0.0116068	0.233265	TULP1
peak_16268	1.62865	-2.40435	6.36767	0.0116218	0.233329	ARHGEF18
peak_18077	-0.778447	0.516475	6.3674	0.0116236	0.233329	ZNF417
peak_18536	1.62303	-2.39772	6.36279	0.0116538	0.23362	LTBP1
peak_2852	1.80877	-2.0907	6.36232	0.0116569	0.23362	ELF3
peak_29508	2.03551	-2.7182	6.36207	0.0116585	0.23362	ARID1B
peak_30478	1.5095	-2.22978	6.35696	0.0116922	0.234119	GUSB
peak_12014	1.91958	-2.78797	6.35577	0.0117	0.234119	METTL22
peak_119	1.29343	-0.593916	6.35518	0.0117039	0.234119	MMEL1
peak_22736	-0.691179	0.826608	6.34642	0.0117618	0.235141	TOB2
peak_6186	1.59046	-1.14667	6.34017	0.0118034	0.235834	FGF3
peak_14317	1.66297	-1.97798	6.33656	0.0118274	0.236177	FAM171A2
peak_3463	-1.18601	-0.878213	6.32935	0.0118756	0.236847	EFCAB2
peak_17148	-1.52627	-1.51602	6.3288	0.0118793	0.236847	ZNF781
peak_29704	1.73339	-1.80449	6.32844	0.0118817	0.236847	THBS2
peak_1162	2.07117	-2.67481	6.32339	0.0119155	0.23729	PTCH2
peak_4587	-0.680248	0.757289	6.32306	0.0119178	0.23729	2022-03-05
peak_28602	-0.900737	-0.298196	6.32113	0.0119308	0.237312	CCND3
peak_19362	-0.889798	-0.218611	6.32084	0.0119327	0.237312	ACOXL
peak_5470	2.01644	-2.38437	6.31767	0.011954	0.237598	CALCA
peak_26967	1.81159	-2.28584	6.30151	0.0120635	0.239636	LOC101927421
peak_4894	-0.883973	0.298007	6.29603	0.0121009	0.24007	ABLIM1
peak_6156	1.14589	-1.52	6.29498	0.0121081	0.24007	PPP6R3
peak_22198	-1.33607	-1.2563	6.29394	0.0121151	0.24007	TMEM191A
peak_24007	-1.00156	-0.595683	6.29376	0.0121164	0.24007	NFKBIZ
peak_26927	-0.68137	1.01561	6.29318	0.0121204	0.24007	TMED7-TICAM2
peak_4545	2.09507	-2.87025	6.29051	0.0121386	0.240293	LIPF
peak_17275	0.96698	-0.864692	6.28837	0.0121533	0.240445	SERTAD1
peak_15866	1.49151	-2.1136	6.2857	0.0121716	0.240668	CDC34
peak_17269	1.2489	-1.83861	6.2793	0.0122157	0.2414	MIR6796
peak_22251	1.84126	-2.4023	6.27211	0.0122653	0.242242	ZNF280B
peak_31266	-2.44388	-2.48859	6.27098	0.0122731	0.242256	TPK1
peak_33603	1.29824	-1.49419	6.26211	0.0123348	0.243074	LINC02578
peak_8519	1.29485	-1.95957	6.26168	0.0123377	0.243074	SETD1B
peak_18085	1.92988	-2.73228	6.26138	0.0123398	0.243074	ZSCAN18
peak_22130	1.69979	-2.17721	6.26094	0.0123429	0.243074	MICAL3
peak_25072	-0.733506	1.20238	6.2535	0.0123948	0.243957	ABLIM2
peak_34070	0.740799	-0.184855	6.25245	0.0124022	0.243962	PTGDS
peak_9266	0.905665	-0.771615	6.24735	0.0124379	0.244525	ABCC4
peak_10550	1.53655	-1.78537	6.24369	0.0124636	0.244845	GPR132
peak_17721	0.771907	-0.275656	6.243	0.0124685	0.244845	BAX
peak_1909	-0.817866	0.785994	6.23968	0.0124919	0.245165	RNVU1-19
peak_10399	-0.755339	0.0681021	6.23594	0.0125183	0.245542	BCL11B
peak_63	2.21162	-2.62622	6.22911	0.0125667	0.246143	CDK11A
peak_10274	-0.983145	-0.488509	6.22819	0.0125732	0.246143	GPR68
peak_33738	1.37261	-1.36572	6.2281	0.0125739	0.246143	SH2D3C
peak_33578	-0.751943	0.592263	6.22757	0.0125776	0.246143	AKNA
peak_4602	2.01939	-2.83825	6.22588	0.0125896	0.246237	MYOF
peak_32550	2.28335	-3.07959	6.22338	0.0126074	0.246445	TG
peak_21496	1.83797	-1.74642	6.21987	0.0126324	0.246689	CDH4
peak_30553	1.64005	-2.19754	6.21961	0.0126343	0.246689	TBL2
peak_15883	1.68956	-1.71621	6.21775	0.0126476	0.246808	MISP
peak_12808	-1.89455	-2.09913	6.21625	0.0126583	0.246814	CYB5B
peak_25413	-0.749233	0.568564	6.21569	0.0126623	0.246814	YTHDC1
peak_21241	1.39464	-1.82776	6.21412	0.0126735	0.246893	SDC4
peak_20718	1.28391	-1.34724	6.21303	0.0126813	0.246904	LINC01433
peak_24925	1.55649	-1.83286	6.21059	0.0126988	0.247043	CTBP1-AS
peak_6568	-1.34365	-1.02354	6.21003	0.0127029	0.247043	LOC100132078
peak_30371	1.87238	-2.63905	6.20649	0.0127283	0.247398	LOC730234
peak_15119	1.33829	-1.67013	6.20478	0.0127406	0.247497	ENPP7
peak_2236	0.930408	-0.607507	6.19981	0.0127764	0.248052	FAM189B
peak_4082	1.49715	-2.06998	6.19775	0.0127913	0.24819	LOC105378577
peak_16950	1.79896	-2.43527	6.19636	0.0128013	0.24819	LINC01224
peak_25405	1.92145	-2.73063	6.19539	0.0128084	0.24819	LOC101927237
peak_18294	-1.88937	-2.09912	6.19482	0.0128125	0.24819	MIR3681
peak_25076	-0.859415	1.16444	6.18857	0.0128578	0.248928	ACOX3
peak_4374	-1.35	-1.01464	6.18146	0.0129096	0.249789	FUT11
peak_22971	1.89453	-1.82866	6.1769	0.0129429	0.250293
peak_20747	-1.24038	-0.8289	6.17113	0.0129852	0.250907	GPCPD1
peak_15839	1.93749	-2.04015	6.17057	0.0129893	0.250907	LOC284241
peak_31548	1.53124	-1.95047	6.16796	0.0130084	0.251135	ANGPT2
peak_6757	-1.31252	-1.15843	6.16181	0.0130537	0.251868	SORL1
peak_17418	1.72414	-1.54127	6.15201	0.0131263	0.253125	ZNF575
peak_2548	-1.19023	-0.636159	6.14617	0.0131697	0.253792	MIR557
peak_14783	2.17604	-2.7794	6.14365	0.0131885	0.253792	HELZ
peak_30967	1.60651	-2.03484	6.14329	0.0131912	0.253792
peak_6756	-1.04068	-0.693304	6.14283	0.0131946	0.253792	SORL1
peak_17246	1.59381	-1.66861	6.14155	0.0132041	0.253792	FCGBP
peak_9249	-1.97019	-2.0232	6.1414	0.0132053	0.253792	LINC00440
peak_30617	-1.39771	-1.19899	6.13847	0.0132272	0.254071	HIP1
peak_3943	2.15685	-2.81652	6.12237	0.0133481	0.256252	LINC02644
peak_17240	1.53443	-1.82562	6.11736	0.0133861	0.256836	MIR6719
peak_268	-1.08005	-0.596362	6.11467	0.0134065	0.257084	PEX14
peak_14855	1.9312	-2.44915	6.1127	0.0134214	0.257226	CPSF4L
peak_22115	1.54269	-2.36151	6.11163	0.0134295	0.257238	CECR2
peak_25012	1.69422	-2.04128	6.11033	0.0134394	0.257283	FAM86EP
peak_29240	-1.11021	-0.383071	6.10721	0.0134632	0.257595	SAMD3
peak_14247	0.617823	0.409583	6.10246	0.0134994	0.258144	MLX
peak_4116	1.29273	-1.95682	6.08868	0.0136051	0.259875	WDFY4
peak_894	-0.896695	-0.252211	6.08797	0.0136105	0.259875	AZIN2
peak_30059	1.47634	-1.79231	6.0877	0.0136126	0.259875	NUP42
peak_6190	-0.687631	0.599221	6.08417	0.0136399	0.260115	PPFIA1
peak_12185	1.65675	-2.4219	6.0841	0.0136404	0.260115	DNAH3
peak_7633	1.44062	-1.8996	6.08003	0.0136718	0.26057	KRT78
peak_16734	1.43277	-1.5736	6.07881	0.0136813	0.260582	CPAMD8
peak_3400	-1.40369	-1.19559	6.07799	0.0136876	0.260582	LYST
peak_6163	1.70156	-2.56042	6.07169	0.0137365	0.261367	TESMIN
peak_14228	0.798916	-0.442251	6.06704	0.0137727	0.261911	STAT5B
peak_24909	2.12832	-2.87761	6.0649	0.0137894	0.262043	DGKQ
peak_5087	1.67986	-2.21911	6.06419	0.013795	0.262043	LRRC27
peak_21125	1.84268	-2.75663	6.0598	0.0138294	0.262551	RBL1
peak_30710	1.17525	-1.12761	6.05638	0.0138561	0.262764	MTERF1
peak_11812	1.53034	-1.56466	6.0549	0.0138678	0.262764	PRR25
peak_18477	-1.03109	-0.574084	6.05448	0.0138711	0.262764	FLJ31356
peak_28996	1.77714	-2.60122	6.05402	0.0138747	0.262764	HACE1
peak_27515	-1.06807	-0.736785	6.05349	0.0138789	0.262764	FBXW11
peak_18403	1.57393	-2.32158	6.05193	0.0138911	0.262851	DTNB
peak_4203	-3.05591	-2.74853	6.04836	0.0139192	0.263237	ZNF365
peak_14822	-0.76549	0.603288	6.04604	0.0139375	0.263438	ARSG
peak_4968	1.86892	-2.70579	6.04181	0.0139709	0.2637	BUB3
peak_25487	-0.656225	0.854376	6.04147	0.0139736	0.2637	CNOT6L
peak_33910	-1.12467	-0.92747	6.04137	0.0139744	0.2637	MED27
peak_17860	1.86891	-2.70579	6.04011	0.0139844	0.263743	HAS1
peak_29371	-0.721405	0.596601	6.03727	0.0140069	0.264023	VTA1
peak_21404	-1.2339	-1.11829	6.0294	0.0140695	0.265057	SUMO1P1
peak_19369	-2.42481	-2.51086	6.02704	0.0140883	0.265265	MIR4435-2HG
peak_31729	-1.06879	-0.308274	6.02359	0.0141159	0.265496	MIR6876
peak_584	-0.728448	0.243574	6.02357	0.014116	0.265496	RUNX3
peak_32772	-1.64606	-1.79118	6.00873	0.0142353	0.267592	DOCK8
peak_25827	-1.13553	-0.920337	6.00266	0.0142843	0.268298	JADE1
peak_29048	1.97383	-2.88716	6.00215	0.0142885	0.268298	SEC63
peak_10731	1.53718	-1.86257	5.99876	0.014316	0.268667	AQR
peak_9754	1.21843	-1.77233	5.99628	0.0143361	0.268898	CDKL1
peak_22053	1.29734	-1.7723	5.99123	0.0143771	0.26952	LOC101928796
peak_10480	1.26767	-1.75559	5.99	0.0143872	0.269561	ANKRD9
peak_33572	1.59804	-2.07893	5.98851	0.0143994	0.269642	KIF12
peak_22899	-0.951329	-0.359649	5.98481	0.0144296	0.270061	TTC38
peak_31498	2.11473	-2.75091	5.98253	0.0144482	0.270262	TDRP
peak_17304	-0.865294	0.377877	5.98123	0.0144589	0.270315	CYP2T1P
peak_7362	-1.64214	-1.79539	5.98026	0.0144669	0.270316	AMN1
peak_28540	1.30531	-1.82138	5.9766	0.014497	0.270693	MDGA1
peak_32902	1.91933	-2.24592	5.97562	0.014505	0.270693	IFNA17
peak_2513	-1.15313	-0.821299	5.97383	0.0145197	0.270693	CD247
peak_25256	1.98155	-2.64129	5.9734	0.0145233	0.270693	UBE2K
peak_16675	1.98154	-2.64129	5.973	0.0145265	0.270693	CYP4F3
peak_4343	-0.674367	0.810511	5.97172	0.0145371	0.270744	DDIT4
peak_30525	1.49414	-2.02275	5.96923	0.0145577	0.270979	GALNT17
peak_7112	-0.736512	0.898419	5.96449	0.0145969	0.271562	NECAP1
peak_26080	1.37259	-2.10441	5.96189	0.0146183	0.271814	TENM3
peak_22935	1.91966	-2.39049	5.95943	0.0146388	0.272046	MIR3201
peak_11681	-1.21339	-1.0354	5.95225	0.0146985	0.273008	MCTP2
peak_16366	-0.815994	0.387826	5.94964	0.0147203	0.27324	PPAN
peak_22877	1.38116	-1.73678	5.94782	0.0147355	0.27324	SMC1B
peak_7901	-1.2435	-1.10975	5.94556	0.0147544	0.27324	GRIP1
peak_13134	-0.705386	0.326023	5.94549	0.014755	0.27324	RNF166
peak_8357	1.40133	-1.92188	5.94513	0.014758	0.27324	ATXN2
peak_2071	1.01118	-1.19323	5.94504	0.0147587	0.27324	ADAMTSL4
peak_12099	0.989077	-1.14373	5.93985	0.0148023	0.273898	MRTFB
peak_28070	-0.84844	-0.000403377	5.93671	0.0148287	0.274239	HIST1H1E
peak_22591	1.82029	-2.4424	5.93094	0.0148773	0.274803	TRIOBP
peak_2366	1.18881	-1.7112	5.93009	0.0148845	0.274803	KCNJ9
peak_18958	1.53095	-2.24463	5.9289	0.0148945	0.274803	CYP26B1
peak_5077	1.96254	-2.57532	5.92863	0.0148968	0.274803	JAKMIP3
peak_17503	1.14254	-1.26574	5.92834	0.0148993	0.274803	MARK4
peak_11835	1.25201	-1.8375	5.9268	0.0149123	0.274897	UNKL
peak_32054	2.06123	-2.92175	5.9242	0.0149343	0.275089	LOC401463
peak_11213	1.94338	-2.21431	5.92367	0.0149388	0.275089	CALML4
peak_19743	-2.14449	-2.25085	5.92259	0.014948	0.27511	SLC38A11
peak_18442	1.59708	-2.17648	5.916	0.015004	0.275953	ABHD1
peak_14180	0.967676	-1.06426	5.91531	0.0150099	0.275953	CCR7
peak_20048	-0.807014	0.489487	5.91306	0.015029	0.276047	AOX3P-AOX2P
peak_33280	1.79405	-2.49332	5.91282	0.0150311	0.276047	UNQ6494
peak_17779	1.22416	-1.73068	5.91156	0.0150418	0.276097	AP2A1
peak_31195	1.80486	-2.55758	5.91039	0.0150519	0.276108	PARP12
peak_15473	-1.385	-1.08874	5.90961	0.0150585	0.276108	TMEM241
peak_1314	-1.45201	-1.58063	5.90748	0.0150767	0.276293	DAB1
peak_20561	1.5702	-2.06293	5.9008	0.015134	0.277195	SNED1
peak_10863	1.50658	-2.02912	5.89652	0.0151709	0.277722	TTBK2
peak_20508	1.36517	-2.04568	5.8955	0.0151796	0.277733	TRAF3IP1
peak_16997	1.78356	-2.66976	5.89457	0.0151876	0.277733	TSHZ3
peak_8626	-1.18582	-1.05884	5.89173	0.0152122	0.278034	SLC15A4
peak_2595	-1.23005	-0.92515	5.88592	0.0152624	0.278709	FASLG
peak_10345	1.5352	-2.19256	5.88477	0.0152724	0.278709	COX8C
peak_25941	1.58659	-2.44418	5.88464	0.0152735	0.278709	LOC729870
peak_8671	1.70652	-2.62864	5.87833	0.0153284	0.279561	EP400
peak_8448	1.45674	-1.52341	5.87732	0.0153371	0.279572	PXN
peak_9015	1.81728	-2.74865	5.87516	0.015356	0.279671	SIAH3
peak_8748	1.55331	-1.96554	5.87483	0.0153588	0.279671	LINC00367
peak_5880	-0.721369	1.69704	5.8736	0.0153696	0.279718	WDR74
peak_11858	1.42729	-1.98583	5.86789	0.0154195	0.280478	HS3ST6
peak_9451	1.86415	-2.58528	5.866	0.015436	0.280534	TMEM255B
peak_32763	-1.28792	-1.29581	5.86531	0.0154422	0.280534	DDX11L5
peak_27785	1.44269	-1.77509	5.86474	0.0154471	0.280534	KU-MEL-3
peak_29521	-1.38721	-1.47908	5.85748	0.015511	0.281545	ARID1B
peak_29404	1.30204	-1.29814	5.85622	0.0155221	0.281597	PLAGL1
peak_11789	1.40702	-1.59933	5.85514	0.0155316	0.281621	RAB11FIP3
peak_6755	-0.715746	0.277566	5.85368	0.0155445	0.281707	SORL1
peak_15720	1.15707	-1.69568	5.85197	0.0155596	0.281831	TNFRSF11A
peak_20056	1.55874	-1.61483	5.84518	0.0156198	0.282771	FAM126B
peak_28709	1.84961	-2.69951	5.84049	0.0156615	0.283377	LOC105375075
peak_15277	1.20636	-1.59436	5.83925	0.0156725	0.283427	B3GNTL1
peak_7850	1.44997	-2.04739	5.83723	0.0156906	0.283557	TAFA2
peak_27645	1.93733	-2.68154	5.83589	0.0157025	0.283557	LOC100128340
peak_21543	0.851176	-0.690618	5.83506	0.0157099	0.283557	SLC17A9
peak_23000	0.868754	-0.722333	5.83474	0.0157128	0.283557	ODF3B
peak_14656	-1.40015	-1.07381	5.82651	0.0157864	0.284736	LOC101927855
peak_22812	2.13876	-2.95679	5.82274	0.0158203	0.285197	TTLL1
peak_6152	1.33917	-2.03327	5.8216	0.0158305	0.285204	C11orf24
peak_10183	1.86258	-2.77264	5.82085	0.0158373	0.285204	TMEM63C
peak_18922	0.993946	-1.14257	5.81984	0.0158464	0.285219	LINC01816
peak_28235	-0.788577	0.0167312	5.81867	0.0158569	0.285259	PPP1R18
peak_28556	1.86252	-2.77264	5.81576	0.0158832	0.285581	SAYSD1
peak_22859	2.35865	-2.97867	5.81307	0.0159075	0.285869	ARHGAP8
peak_5326	2.07196	-2.86608	5.81187	0.0159184	0.285914	HBE1
peak_21209	1.55484	-2.31455	5.80816	0.015952	0.286052	TOX2
peak_30244	-0.965535	-0.346815	5.80764	0.0159567	0.286052	AOAH
peak_22953	1.61566	-2.09341	5.80749	0.015958	0.286052	BRD1
peak_828	1.61564	-2.09341	5.80677	0.0159646	0.286052	COL16A1
peak_31644	2.0877	-2.92752	5.80642	0.0159678	0.286052	GFRA2
peak_20203	-1.45112	-1.57869	5.80235	0.0160047	0.286565	CXCR2
peak_17192	1.44833	-1.23019	5.80033	0.0160232	0.286715	CAPN12
peak_21878	1.70136	-2.44719	5.79909	0.0160345	0.286715	TMPRSS2
peak_16033	1.73695	-2.40837	5.7976	0.0160481	0.286715	MIR7850
peak_11591	1.00965	-1.02587	5.79691	0.0160544	0.286715	IDH2
peak_22966	0.919556	-0.724645	5.79685	0.0160549	0.286715	MIR6821
peak_30264	-1.48799	-1.54933	5.79087	0.0161096	0.287543	GPR141
peak_18642	1.69163	-2.44351	5.78933	0.0161237	0.287644	ABCG8
peak_8329	-0.648642	0.689786	5.7821	0.0161902	0.28868	PPTC7
peak_34022	1.65481	-2.4828	5.77608	0.0162458	0.289521	TMEM250
peak_15408	-0.638215	0.894837	5.77202	0.0162833	0.289991	PTPN2
peak_6704	1.65369	-2.11356	5.7714	0.0162891	0.289991	UPK2
peak_28251	-0.688082	0.352645	5.76931	0.0163084	0.290185	GTF2H4
peak_32465	-1.3839	-1.34117	5.76697	0.0163302	0.290422	MTSS1
peak_33997	2.06104	-2.86446	5.76453	0.0163529	0.290575	COL5A1
peak_17	0.966621	-0.886013	5.76422	0.0163557	0.290575	LOC100288175
peak_21603	-1.36357	-1.35899	5.75842	0.0164098	0.291385	TCEA2
peak_13640	-0.727274	0.179047	5.75673	0.0164256	0.291515	MGC12916
peak_21801	0.904188	-0.879551	5.75284	0.016462	0.292009	RUNX1
peak_33081	0.657634	0.241638	5.74736	0.0165135	0.292771	DCAF10
peak_22523	0.982131	-1.07093	5.74337	0.016551	0.293216	MYH9
peak_32757	0.97513	-1.06824	5.74249	0.0165593	0.293216	ZNF250
peak_8792	2.03635	-2.78876	5.74197	0.0165642	0.293216	C1QTNF9
peak_2756	-1.20974	-0.769886	5.74003	0.0165825	0.293389	RGS13
peak_33550	2.03482	-2.66915	5.73643	0.0166166	0.293839	SLC46A2
peak_20779	-1.571	-1.8529	5.73239	0.0166548	0.294258	MKKS
peak_12612	1.21211	-1.91434	5.73124	0.0166657	0.294258	MT1F
peak_2432	1.52643	-2.41584	5.73121	0.016666	0.294258	PCP4L1
peak_11413	-1.25776	-1.32117	5.72841	0.0166926	0.294534	TBC1D2B
peak_12757	1.52333	-1.66881	5.72776	0.0166988	0.294534	CTRL
peak_25860	-2.13208	-2.27366	5.72633	0.0167124	0.294623	SETD7
peak_17557	1.57238	-1.85265	5.7242	0.0167327	0.294677	NOVA2
peak_23976	1.6618	-2.54783	5.7242	0.0167327	0.294677	DCBLD2
peak_14427	-1.81411	-2.16871	5.72247	0.0167492	0.294817	SKAP1
peak_27767	1.19804	-1.58993	5.71896	0.0167826	0.294847	TUBB2A
peak_12352	1.78005	-2.6029	5.71866	0.0167855	0.294847	SNX29P2
peak_22049	1.84282	-2.36072	5.71852	0.0167868	0.294847	PCBP3
peak_15411	-1.21284	-0.471784	5.71784	0.0167934	0.294847	SEH1L
peak_7340	1.59892	-2.33779	5.71704	0.016801	0.294847	OVCH1-AS1
peak_12050	-1.58887	-1.84104	5.71689	0.0168025	0.294847	CLEC16A
peak_2749	1.39586	-1.48705	5.71278	0.0168418	0.295031	BRINP3
peak_18716	1.77131	-2.72528	5.71205	0.0168489	0.295031	STON1-GTF2A1L
peak_16703	-0.923158	-0.424406	5.71183	0.016851	0.295031	KLF2
peak_26156	1.2877	-1.08737	5.71087	0.0168602	0.295031	LINC01262
peak_148	1.68699	-2.44156	5.71086	0.0168603	0.295031	LINC01345
peak_2701	1.31666	-1.65774	5.71041	0.0168646	0.295031	LAMC1-AS1
peak_24081	-1.43333	-1.59443	5.70853	0.0168826	0.295051	CCDC80
peak_20358	-1.14724	-1.0883	5.7085	0.0168829	0.295051	SPATA3-AS1
peak_10358	1.14603	-1.60276	5.70563	0.0169106	0.295227	CLMN
peak_22268	1.80874	-2.62236	5.70489	0.0169177	0.295227	MIR5571
peak_7017	1.6294	-2.59466	5.70478	0.0169188	0.295227	LINC02443
peak_26655	-0.665328	1.00098	5.70234	0.0169423	0.295487	IQGAP2
peak_11351	1.79892	-2.60842	5.69965	0.0169682	0.295789	PPCDC
peak_20496	1.80862	-2.62236	5.69824	0.0169819	0.295877	ESPNL
peak_3421	1.77561	-2.4318	5.69361	0.0170268	0.296336	LINC01139
peak_29937	1.28782	-1.72629	5.69293	0.0170334	0.296336	ZNF815P
peak_1184	-0.673058	1.22788	5.69285	0.0170342	0.296336	GPBP1L1
peak_13227	1.64581	-2.11176	5.69179	0.0170445	0.296364	DOC2B
peak_6845	-1.17112	-1.07006	5.68851	0.0170763	0.296768	LINC02098
peak_4373	-1.68726	-1.99242	5.6866	0.017095	0.296942	FUT11
peak_31393	2.34614	-2.80003	5.68292	0.0171308	0.297278	LOC101929998
peak_17695	-0.719498	1.3372	5.68185	0.0171413	0.297278	SPHK2
peak_33961	1.58622	-2.22501	5.68135	0.0171461	0.297278	FAM163B
peak_17678	1.44694	-1.99942	5.68106	0.017149	0.297278	KDELR1
peak_19531	1.73979	-2.52835	5.67954	0.0171639	0.29738	RAB6D
peak_18864	1.12911	-1.59035	5.67869	0.0171722	0.29738	WDR92
peak_28970	1.56729	-2.49994	5.67776	0.0171813	0.297387	MANEA
peak_34107	1.19412	-1.67111	5.67149	0.0172428	0.298301	ENTPD8
peak_6693	-0.760042	0.0286728	5.66965	0.0172609	0.298428	CXCR5
peak_31907	-1.52886	-1.50841	5.66897	0.0172675	0.298428	AP3M2
peak_12683	1.69655	-2.23568	5.66705	0.0172865	0.298542	GOT2
peak_7489	1.83051	-2.51639	5.66565	0.0173003	0.298542	OR8S1
peak_32374	1.55775	-2.43349	5.66489	0.0173078	0.298542	TRPS1
peak_10406	1.13096	-1.5114	5.66423	0.0173143	0.298542	CCNK
peak_17900	1.48059	-2.01819	5.66389	0.0173177	0.298542	ZNF347
peak_6989	-0.914599	-0.290351	5.66267	0.0173297	0.298588	CRACR2A
peak_4555	-0.670747	1.21115	5.66186	0.0173377	0.298588	LIPA
peak_33642	1.50564	-2.40398	5.6604	0.0173521	0.298687	PTGS1
peak_33091	1.6249	-2.29971	5.65565	0.0173993	0.299348	FAM95C
peak_30600	1.01457	-1.29299	5.65294	0.0174261	0.29966	NCF1C
peak_22468	1.36634	-2.10236	5.64986	0.0174568	0.299873	C22orf24
peak_28522	0.98364	-1.20618	5.64902	0.0174651	0.299873	PIM1
peak_22565	-1.24203	-1.2173	5.64884	0.0174669	0.299873	CYTH4
peak_25390	-1.19162	-0.705987	5.64818	0.0174735	0.299873	ADGRL3-AS1
[truncated: 32,307 more rows]
